# Supplementary material for: Tuning catalysis by surface-deposition of elements on oxidation catalystsviaatomic layer deposition
Source: Royal Society of Chemistry journal article supplement (doi:10.1039/d2cy02184f), 2023-01-01
Supplement: d2cy02184f1.xlsx [file d2cy02184f1.xlsx]

## Sheet: Sheet1
Ethane_Selective_Oxidation
Sample	MoVTeNbOx
Modification	Base
Weight	1.1184	g
Volume	1	ml
TOS[h]	Temperature_measured[°C]	GHSV[h-1]	Ethane_in[%vol]	Oxygen_in[%vol]	Steam_in[%vol]	Ethane_Conversion_direct[%]	Oxygen_Conversion[%]	Ethane_Conversion_product_based[%]	Selectivity_Ethylene_product_based[%]	Selectivity_CO_product_based[%]	Selectivity_CO2_product_based[%]	Selectivity_Acetic_Acid_product_based[%]
14.9846	250.788	1000	3	9	0	3.32638	0.264499	3.14738	100	0	0	0
23.7996	300.989	1000	3	9	0	9.40108	3.34724	13.8673	99.1485	0	0	0.851533
32.5693	351.367	1000	3	9	0	42.3372	9.97003	41.1689	96.3353	1.11613	2.2866	0.261947
41.3294	376.293	1000	3	9	0	60.5573	15.8107	59.9382	91.5406	4.88301	3.57639	0
51.5532	401.329	1000	3	9	0	77.2994	23.9274	77.1571	84.422	10.1785	5.39946	0
60.5305	376.232	1000	3	9	0	62.524	16.6242	62.1172	91.2343	5.20787	3.55786	0
69.5009	351.138	1000	3	9	0	44.9916	10.6226	44.1372	96.1831	1.50072	2.16643	0.149723
78.9829	300.984	1000	3	9	0	15.6687	3.27588	15.5226	99.0056	0	0	0.9944
88.8126	250.86	1000	3	9	0	3.42795	0.373322	3.38284	100	0	0	0
97.7222	326.126	1000	3	9	0	28.0512	5.7945	27.2623	98.6299	0	0.844233	0.525896
129.753	326.209	2000	3	9	0	15.8222	3.52931	15.8751	99.5549	0	0	0.445134
151.502	326.152	5000	3	9	0	7.48356	1.45812	7.29899	100	0	0	0
180.077	326.302	500	3	9	0	42.2844	9.1312	42.1365	96.7015	0.893681	1.91536	0.489501
Sample	MoVTeNbOx
Modification	POx
Weight	1.1313	g
Volume	1	ml
TOS[h]	Temperature_measured[°C]	GHSV[h-1]	Ethane_in[%vol]	Oxygen_in[%vol]	Steam_in[%vol]	Ethane_Conversion_direct[%]	Oxygen_Conversion[%]	Ethane_Conversion_product_based[%]	Selectivity_Ethylene_product_based[%]	Selectivity_CO_product_based[%]	Selectivity_CO2_product_based[%]	Selectivity_Acetic_Acid_product_based[%]
41.7097	250	1000	3	9	0	2.85549	0.0547435	0.262435	100	0	0	0
60.2736	300	1000	3	9	0	2.04045	0.548257	2.40258	100	0	0	0
83.3893	350	1000	3	9	0	11.8938	2.52341	12.5215	97.2863	0	2.71373	0
106.414	400	1000	3	9	0	28.979	7.10101	29.2072	92.6283	3.70885	3.66289	0
126.356	425	1000	3	9	0	81.9501	28.1132	82.3918	77.1703	16.9202	5.90957	0
146.286	400	1000	3	9	0	72.0797	20.5593	72.5875	86.199	9.79291	4.00804	0
166.261	350	1000	3	9	0	36.4851	7.87516	36.2469	98.2541	0.0399828	1.23001	0.475924
187.87	300	1000	3	9	0	11.9958	2.41262	11.2352	98.6671	0	0	1.3329
208.01	250	1000	3	9	0	-8.44547	0.428406	2.13044	100	0	0	0
307.033	325	1000	3	9	0	20.1913	3.26032	21.9265	98.8993	0	0	1.10067
328.499	325	2000	3	9	0	23.0687	6.54818	10.5532	96.0352	0	0	3.96484
351.474	325	5000	3	9	0	4.61477	0.427411	5.42353	99.4143	0	0	0.585652
380.577	325	500	3	9	0	32.8364	5.72238	34.4284	97.8117	0	0.975371	1.21292
Sample	MoVTeNbOx
Modification	BOx
Weight	1.162	g
Volume	1	ml
TOS[h]	Temperature_measured[°C]	GHSV[h-1]	Ethane_in[%vol]	Oxygen_in[%vol]	Steam_in[%vol]	Ethane_Conversion_direct[%]	Oxygen_Conversion[%]	Ethane_Conversion_product_based[%]	Selectivity_Ethylene_product_based[%]	Selectivity_CO_product_based[%]	Selectivity_CO2_product_based[%]	Selectivity_Acetic_Acid_product_based[%]
15.2869	250	1000	3	9	0	0.940545	0.0654411	1.66132	100	0	0	0
36.7092	300	1000	3	9	0	8.62425	1.15666	10.0715	99.4419	0	0	0.558126
58.1064	350	1000	3	9	0	40.6392	7.32653	42.9388	96.2715	1.2766	2.37565	0.0762284
81.0938	375	1000	3	9	0	63.0541	12.2183	66.191	90.4367	5.67387	3.88946	0
101.09	400	1000	3	9	0	81.3164	19.2737	83.7707	81.746	11.9603	6.29369	0
120.968	375	1000	3	9	0	68.2005	14.27	70.6393	89.4211	6.41722	4.1617	0
140.801	350	1000	3	9	0	50.0811	9.8859	51.97	94.973	2.3894	2.63765	0
162.159	300	1000	3	9	0	17.342	3.33593	18.157	99.0489	0	0	0.951054
203.593	250	1000	3	9	0	0	0	5.00328	99.0003	0	0.071542	0.928112
249.417	325	1000	3	9	0	22.867	0	31.3014	98.6434	0	1.35658	0
272.917	325	2000	3	9	0	13.0561	0	17.3429	99.9262	0	0.0738055	0
296.917	325	5000	3	9	0	4.87252	0	8.73231	100	0	0	0
326.417	325	500	3	9	0	31.5235	0	45.6165	95.8376	1.55712	2.51119	0.0940491
Sample	MoVTeNbOx
Modification	MnOx
Weight	1.1009	g
Volume	1	ml
TOS[h]	Temperature_measured[°C]	GHSV[h-1]	Ethane_in[%vol]	Oxygen_in[%vol]	Steam_in[%vol]	Ethane_Conversion_direct[%]	Oxygen_Conversion[%]	Ethane_Conversion_product_based[%]	Selectivity_Ethylene_product_based[%]	Selectivity_CO_product_based[%]	Selectivity_CO2_product_based[%]	Selectivity_Acetic_Acid_product_based[%]
14.9812	250	1000	3	9	0	0	0	0.00334584	83.3333	0	0	0
36.4036	300	1000	3	9	0	0	0	0.544472	96.0504	0	3.94961	0
59.3316	350	1000	3	9	0	3.69206	0	7.96153	93.6422	0.775065	5.58275	0
80.7839	400	1000	3	9	0	46.5155	9.70052	50.7579	86.6262	8.82381	4.55001	0
100.784	425	1000	3	9	0	78.635	23.3522	81.5296	73.8902	18.6156	7.49418	0
120.667	400	1000	3	9	0	69.1028	17.6936	71.5912	83.2707	11.4442	5.2851	0
140.495	350	1000	3	9	0	34.0097	6.04107	36.3238	96.4578	1.57371	1.96851	0
161.859	300	1000	3	9	0	10.6274	1.9684	11.5971	98.7036	0	0	1.29635
203.302	250	1000	3	9	0	0	0	3.14763	99.9624	0	0.015735	0.0219097
249.417	325	1000	3	9	0	10.4816	0	20.4738	99.1604	0	0.328741	0.51083
272.06	325	2000	3	9	0	6.23961	0	11.7532	99.7916	0	0	0.208413
296.917	325	5000	3	9	0	1.14458	0	5.19352	100	0	0	0
326.017	325	500	3	9	0	18.3073	0	32.6349	96.8932	0.757174	1.76842	0.581192
Sample	MoVOx
Modification	Base
Weight	0.9341	g
Volume	1	ml
TOS[h]	Temperature_measured[°C]	GHSV[h-1]	Ethane_in[%vol]	Oxygen_in[%vol]	Steam_in[%vol]	Ethane_Conversion_direct[%]	Oxygen_Conversion[%]	Ethane_Conversion_product_based[%]	Selectivity_Ethylene_product_based[%]	Selectivity_CO_product_based[%]	Selectivity_CO2_product_based[%]	Selectivity_Acetic_Acid_product_based[%]
15.6816	225	1000	3	9	0	15.9557	4.13424	15.6627	94.9888	0	1.06285	3.94835
35.6473	250	1000	3	9	0	35.3054	10.393	34.4634	85.7355	5.97789	4.16313	4.12344
58.5273	275	1000	3	9	0	61.7638	24.1381	62.9032	70.0623	17.2277	8.05611	4.65388
79.853	300	1000	3	9	0	85.641	46.731	86.2886	48.7612	33.2762	14.0956	3.86703
99.6618	300	1000	3	9	0	85.8471	46.7966	87.368	48.5394	33.3701	13.8046	4.28593
119.555	300	1000	3	9	0	86.8374	47.8435	87.9108	48.4422	33.4281	13.6657	4.46401
140.911	275	1000	3	9	0	69.2213	26.5953	69.6591	69.1555	16.9666	7.03993	6.83797
160.891	250	1000	3	9	0	45.1415	13.0454	45.0272	84.0687	5.84977	2.83113	7.25041
205.443	225	1000	3	9	0	24.7447	5.51916	22.6831	93.483	0	0.0454479	6.47159
278.792	250	1000	3	9	0	40.0626	9.9411	41.9354	85.8756	5.14865	2.60352	6.3722
301.705	250	2000	3	9	0	25.4376	5.52558	26.3019	94.5317	0	0.813624	4.65466
326.157	250	5000	3	9	0	9.15146	1.55561	13.0304	96.9093	0	0	3.09071
355.185	250	500	3	9	0	48.6447	13.0525	49.4839	83.2147	7.12954	3.58631	6.06945
Sample	MoVOx
Modification	POx
Weight	0.9393	g
Volume	1	ml
TOS[h]	Temperature_measured[°C]	GHSV[h-1]	Ethane_in[%vol]	Oxygen_in[%vol]	Steam_in[%vol]	Ethane_Conversion_direct[%]	Oxygen_Conversion[%]	Ethane_Conversion_product_based[%]	Selectivity_Ethylene_product_based[%]	Selectivity_CO_product_based[%]	Selectivity_CO2_product_based[%]	Selectivity_Acetic_Acid_product_based[%]
40.7777	225	1000	3	9	0	16.1537	3.89095	15.6798	95.6673	0	0	4.33266
60.8902	250	1000	3	9	0	33.9207	9.33521	33.1993	89.3407	3.22037	2.84952	4.58938
82.4698	275	1000	3	9	0	58.972	20.2881	59.277	76.4572	12.3265	6.04921	5.1671
107.028	300	1000	3	9	0	82.7543	38.5839	82.3688	59.1567	25.5917	10.7169	4.53475
126.97	300	1000	3	9	0	83.8636	38.9775	83.5579	58.6305	25.8803	10.623	4.86616
146.9	300	1000	3	9	0	83.7239	39.6986	84.2507	58.1182	26.1093	10.5993	5.17317
166.876	275	1000	3	9	0	63.5476	21.4105	63.6367	76.2885	11.6914	5.01915	7.00096
186.943	250	1000	3	9	0	39.3005	10.5539	38.948	88.6378	2.61441	1.67944	7.06832
208.628	225	1000	3	9	0	11.7409	4.75357	20.0416	93.7545	0	0	6.24552
307.647	250	1000	3	9	0	39.9209	9.88289	40.8981	87.1893	3.28458	1.96916	7.55694
327.581	250	2000	3	9	0	24.2606	5.2632	24.7021	94.8236	0	0.217751	4.95865
350.555	250	5000	3	9	0	12.1433	2.19278	12.6457	96.5458	0	0	3.45422
381.189	250	500	3	9	0	54.9564	16.6531	56.2637	76.3649	8.94087	4.34785	10.3464
Sample	MoVOx
Modification	BOx
Weight	0.9458	g
Volume	1	ml
TOS[h]	Temperature_measured[°C]	GHSV[h-1]	Ethane_in[%vol]	Oxygen_in[%vol]	Steam_in[%vol]	Ethane_Conversion_direct[%]	Oxygen_Conversion[%]	Ethane_Conversion_product_based[%]	Selectivity_Ethylene_product_based[%]	Selectivity_CO_product_based[%]	Selectivity_CO2_product_based[%]	Selectivity_Acetic_Acid_product_based[%]
14.0639	225	1000	3	9	0	17.4118	4.00596	17.3782	95.5411	0	0.107538	4.3514
37.0172	250	1000	3	9	0	37.1791	9.78584	37.6884	87.641	4.65493	2.8415	4.86261
58.412	275	1000	3	9	0	64.7789	22.5087	66.5622	72.2301	15.9201	6.87515	4.97468
79.8568	300	1000	3	9	0	86.4903	43.8329	87.8907	50.0479	33.0606	13.1949	3.69655
101.398	275	1000	3	9	0	66.2696	19.7313	70.6834	69.4073	17.3665	6.97872	6.24739
121.28	275	1000	3	9	0	68.509	23.4464	71.1152	68.9716	17.5502	7.07471	6.40355
141.104	275	1000	3	9	0	69.6916	25.6521	71.2256	68.8322	17.6058	7.1119	6.45013
162.462	250	1000	3	9	0	45.428	12.7571	45.6315	84.3964	5.90481	2.75335	6.94544
203.88	225	1000	3	9	0	19.3042	0	24.5228	93.0355	0.312915	0.187117	6.46448
250.083	225	1000	3	9	0	37.539	4.50278	44.2291	85.121	5.65738	2.6955	6.52608
272.917	225	2000	3	9	0	24.606	2.19553	25.9498	94.628	0.118625	0.673712	4.57967
297.345	225	5000	3	9	0	23.2309	14.2788	14.371	95.3376	0	0	4.66235
326.417	225	500	3	9	0	48.7388	6.43765	59.5036	73.4514	11.9191	5.31653	9.313
Sample	MoVOx
Modification	MnOx
Weight	1.3221	g
Volume	1	ml
TOS[h]	Temperature_measured[°C]	GHSV[h-1]	Ethane_in[%vol]	Oxygen_in[%vol]	Steam_in[%vol]	Ethane_Conversion_direct[%]	Oxygen_Conversion[%]	Ethane_Conversion_product_based[%]	Selectivity_Ethylene_product_based[%]	Selectivity_CO_product_based[%]	Selectivity_CO2_product_based[%]	Selectivity_Acetic_Acid_product_based[%]
15.8967	225	1000	3	9	0	5.66691	1.26336	5.85238	96.7374	0	0	3.26264
34.2643	250	1000	3	9	0	13.1137	3.20782	13.5295	95.039	0	1.9588	3.00222
58.7201	275	1000	3	9	0	26.4176	6.70282	29.333	84.8707	7.97248	4.42464	2.73218
80.1725	300	1000	3	9	0	48.9106	15.963	53.2312	71.9254	18.554	7.15921	2.36139
100.171	325	1000	3	9	0	73.8088	32.3725	77.6282	55.5378	31.6373	11.0931	1.73187
121.584	300	1000	3	9	0	57.4549	18.9858	60.9769	71.566	18.4002	6.82828	3.20555
141.412	275	1000	3	9	0	36.8154	9.27428	39.2462	84.5638	7.72052	3.58942	4.12632
162.773	250	1000	3	9	0	20.7679	5.02972	20.8008	94.259	0	1.01591	4.72507
202.405	225	1000	3	9	0	2.83509	0	9.66416	95.1364	0	0	4.86364
248.917	225	1000	3	9	0	10.573	0	19.8235	94.5568	0	0.955616	4.48758
272.917	225	2000	3	9	0	4.50024	0	10.5548	96.4887	0	0	3.51132
297.917	225	5000	3	9	0	7.18738	1.93692	9.07673	95.6283	0.719812	0.376277	3.27559
326.817	225	500	3	9	0	14.5242	0	31.0311	87.4971	4.38098	2.34927	5.7726
Sample	MoO3
Modification	Base
Weight	1.7106	g
Volume	1	ml
TOS[h]	Temperature_measured[°C]	GHSV[h-1]	Ethane_in[%vol]	Oxygen_in[%vol]	Steam_in[%vol]	Ethane_Conversion_direct[%]	Oxygen_Conversion[%]	Ethane_Conversion_product_based[%]	Selectivity_Ethylene_product_based[%]	Selectivity_CO_product_based[%]	Selectivity_CO2_product_based[%]	Selectivity_Acetic_Acid_product_based[%]
15.9889	300	1000	3	9	0	0	0	0	0	0	0	0
35.9501	350	1000	3	9	0	0.509509	0	0	0	0	0	0
57.3084	400	1000	3	9	0	0	0	0.337112	38.4787	0	61.5213	0
78.6346	425	1000	3	9	0	0	0	0.691722	41.1539	0	58.8461	0
99.968	450	1000	3	9	0	0	0	1.24067	43.6439	0	56.3561	0
119.863	425	1000	3	9	0	0	0	0.419379	52.975	0	47.025	0
139.685	400	1000	3	9	0	0	0	0.0522173	100	0	0	0
161.201	350	1000	3	9	0	1.10747	0	0	0	0	0	0
205.752	300	1000	3	9	0	0.00572164	0	0	0	0	0	0
277.573	450	1000	3	9	0	0	0	0.920278	49.5515	0	50.4485	0
302.011	450	2000	3	9	0	2.4182	0	0.233425	83.7556	0	16.2444	0
326.462	450	5000	3	9	0	0	0	0.157048	93.3849	0	6.61514	0
355.491	450	500	3	9	0	0	0	1.06104	49.1513	0	50.8487	0
Sample	MoO3
Modification	POx
Weight	1.3845	g
Volume	1	ml
TOS[h]	Temperature_measured[°C]	GHSV[h-1]	Ethane_in[%vol]	Oxygen_in[%vol]	Steam_in[%vol]	Ethane_Conversion_direct[%]	Oxygen_Conversion[%]	Ethane_Conversion_product_based[%]	Selectivity_Ethylene_product_based[%]	Selectivity_CO_product_based[%]	Selectivity_CO2_product_based[%]	Selectivity_Acetic_Acid_product_based[%]
40.1602	300	1000	3	9	0	0	0.0857316	0	0	0	0	0
60.2724	350	1000	3	9	0	0	0.0982244	0	0	0	0	0
83.392	400	1000	3	9	0	0.181785	0	0.341378	37.5475	0	62.4525	0
106.413	425	1000	3	9	0	0	0	0.88786	38.9992	0	61.0008	0
126.357	450	1000	3	9	0	0	0.128873	1.72858	41.1025	0	58.8975	0
146.288	425	1000	3	9	0	0.0122574	0	0.723291	45.2072	0	54.7928	0
166.257	400	1000	3	9	0	0	0	0.149552	70.6611	0	29.3389	0
187.869	350	1000	3	9	0	0.205453	0	0	0	0	0	0
206.462	300	1000	3	9	0	0.204478	0.123171	0	0	0	0	0
307.033	450	1000	3	9	0	0.25253	0.101353	1.42189	44.7934	0	55.2066	0
328.499	450	2000	3	9	0	0.0747248	0.0709012	0.504144	61.8892	0	38.1108	0
349.943	450	5000	3	9	0	0	0	0.0966177	100	0	0	0
379.045	450	500	3	9	0	0	0.0869634	2.53028	39.4296	0	60.4544	0.116071
Sample	MoO3
Modification	BOx
Weight	1.6319	g
Volume	1	ml
TOS[h]	Temperature_measured[°C]	GHSV[h-1]	Ethane_in[%vol]	Oxygen_in[%vol]	Steam_in[%vol]	Ethane_Conversion_direct[%]	Oxygen_Conversion[%]	Ethane_Conversion_product_based[%]	Selectivity_Ethylene_product_based[%]	Selectivity_CO_product_based[%]	Selectivity_CO2_product_based[%]	Selectivity_Acetic_Acid_product_based[%]
15.374	300	1000	3	9	0	0.226167	0	0	0	0	0	0
36.8694	350	1000	3	9	0	0.00584322	0	0.0144542	0	0	80	0
58.2218	400	1000	3	9	0	0.0733876	0	0.895773	26.9002	0	73.0998	0
79.5493	425	1000	3	9	0	0	0	1.61197	29.2514	0	70.7486	0
99.3569	450	1000	3	9	0	0.304733	0.112907	2.63704	31.6939	0	68.3061	0
120.778	425	1000	3	9	0	0	0.177604	1.15474	33.4324	0	66.5676	0
140.599	400	1000	3	9	0	0	0	0.416523	35.1893	0	64.8107	0
160.586	350	1000	3	9	0	0.182854	0	0	0	0	0	0
205.14	300	1000	3	9	0	0.0108956	0	0	0	0	0	0
278.487	450	1000	3	9	0	0.972633	0	1.79492	37.4945	0	62.5055	0
301.398	450	2000	3	9	0	0	0.0796933	0.811239	44.4243	0	55.5757	0
325.853	450	5000	3	9	0	0	0	0.0942122	100	0	0	0
354.877	450	500	3	9	0	0.0903252	0	2.18417	37.3259	0	62.6741	0
Sample	MoO3
Modification	MnOx
Weight	1.679	g
Volume	1	ml
TOS[h]	Temperature_measured[°C]	GHSV[h-1]	Ethane_in[%vol]	Oxygen_in[%vol]	Steam_in[%vol]	Ethane_Conversion_direct[%]	Oxygen_Conversion[%]	Ethane_Conversion_product_based[%]	Selectivity_Ethylene_product_based[%]	Selectivity_CO_product_based[%]	Selectivity_CO2_product_based[%]	Selectivity_Acetic_Acid_product_based[%]
15.6809	300	1000	3	9	0	0.0507861	0.0114889	0	0	0	0	0
35.6442	350	1000	3	9	0	0	0.33794	0.258942	0	0	100	0
57.0037	400	1000	3	9	0	2.80991	0.938297	1.42801	15.1674	0	84.8326	0
79.8538	425	1000	3	9	0	0.110136	0.936171	2.27513	19.2015	0	80.7985	0
99.6625	450	1000	3	9	0	0.838113	1.17368	3.36713	23.2517	0	76.7483	0
119.558	425	1000	3	9	0	0	0.785309	1.59024	21.1606	0	78.8394	0
140.905	400	1000	3	9	0	0.576451	0.316672	0.665042	15.7892	0	84.2108	0
160.894	350	1000	3	9	0	0.429242	0.086582	0	0	0	0	0
205.446	300	1000	3	9	0	0.248948	0	0	0	0	0	0
278.792	450	1000	3	9	0	3.75298	0.638201	2.14997	27.6278	0	72.3722	0
301.705	450	2000	3	9	0	0.464586	0.397321	1.01465	30.8786	0	69.1214	0
326.157	450	5000	3	9	0	0	0	0.174932	46.0744	0	53.9256	0
355.184	450	500	3	9	0	0.0273961	0.867578	2.57684	28.3151	0	71.6849	0
Sample	V2O5
Modification	Base
Weight	0.9462	g
Volume	1	ml
TOS[h]	Temperature_measured[°C]	GHSV[h-1]	Ethane_in[%vol]	Oxygen_in[%vol]	Steam_in[%vol]	Ethane_Conversion_direct[%]	Oxygen_Conversion[%]	Ethane_Conversion_product_based[%]	Selectivity_Ethylene_product_based[%]	Selectivity_CO_product_based[%]	Selectivity_CO2_product_based[%]	Selectivity_Acetic_Acid_product_based[%]
15.717	301.123	1000	3	9	0	1.83406	1.50978	0.563846	40.8588	0	59.1412	0
24.5299	351.471	1000	3	9	0	0	4.98848	3.12012	33.0308	1.19067	65.7786	0
33.2965	401.515	1000	3	9	0	13.5498	11.8955	11.5744	20.7386	24.6924	54.569	0
42.0609	426.454	1000	3	9	0	18.7485	17.4747	17.6571	17.1179	26.1049	56.7772	0
52.2819	451.542	1000	3	9	0	28.3959	25.9576	25.7927	13.5269	22.8669	63.6062	0
61.257	426.389	1000	3	9	0	15.1353	14.5801	14.0763	19.5052	16.0964	64.3983	0
70.2267	401.449	1000	3	9	0	8.55583	7.89824	6.89942	27.2198	6.00541	66.7748	0
79.7077	351.424	1000	3	9	0	2.39023	2.36555	1.36901	41.811	0	58.189	0
89.5372	301.137	1000	3	9	0	0.76725	0.78606	0.0432233	100	0	0	0
98.4467	451.444	1000	3	9	0	23.9843	23.8288	23.4172	14.1374	16.3751	69.4875	0
130.479	451.555	2000	3	9	0	13.188	13.1747	12.191	21.3568	3.8526	74.7906	0
152.228	451.531	5000	3	9	0	6.88128	6.06845	5.87434	30.7743	0	69.2257	0
180.807	451.472	500	3	9	0	32.1553	36.0338	33.2936	6.73265	0	93.2674	0
Sample	V2O5
Modification	POx
Weight	1.0325	g
Volume	1	ml
TOS[h]	Temperature_measured[°C]	GHSV[h-1]	Ethane_in[%vol]	Oxygen_in[%vol]	Steam_in[%vol]	Ethane_Conversion_direct[%]	Oxygen_Conversion[%]	Ethane_Conversion_product_based[%]	Selectivity_Ethylene_product_based[%]	Selectivity_CO_product_based[%]	Selectivity_CO2_product_based[%]	Selectivity_Acetic_Acid_product_based[%]
16.0794	300.839	1000	3	9	0	1.6255	1.1595	0.637373	100	0	0	0
24.8908	351.081	1000	3	9	0	0	2.85972	2.04314	79.3643	0	20.6357	0
33.6564	401.128	1000	3	9	0	9.403	6.91322	8.12454	45.9153	27.7766	26.3081	0
42.4232	426.067	1000	3	9	0	17.6424	12.9592	16.1981	33.7281	40.8688	25.4031	0
52.6418	451.184	1000	3	9	0	34.9655	22.2129	27.4264	25.5428	49.0932	25.364	0
61.6167	426.116	1000	3	9	0	19.3478	14.3671	18.2903	33.1156	44.4845	22.3998	0
70.5856	401.254	1000	3	9	0	12.9792	9.04746	11.343	41.332	37.9112	20.7568	0
80.0665	350.972	1000	3	9	0	4.7789	3.37819	2.90682	71.6832	9.80396	18.5129	0
89.8958	300.794	1000	3	9	0	1.62197	1.22988	0.536808	100	0	0	0
98.8053	451.118	1000	3	9	0	30.0093	23.3747	29.605	24.7709	51.6578	23.5712	0
130.838	451.203	2000	3	9	0	18.4559	12.9433	17.5742	39.6219	41.5602	18.818	0
152.587	451.169	5000	3	9	0	9.30871	5.50909	7.9072	60.5526	23.8112	15.6362	0
181.167	451.178	500	3	9	0	43.0835	35.4726	43.7941	16.0845	58.6641	25.2514	0
Sample	V2O5
Modification	BOx
Weight	0.9444	g
Volume	1	ml
TOS[h]	Temperature_measured[°C]	GHSV[h-1]	Ethane_in[%vol]	Oxygen_in[%vol]	Steam_in[%vol]	Ethane_Conversion_direct[%]	Oxygen_Conversion[%]	Ethane_Conversion_product_based[%]	Selectivity_Ethylene_product_based[%]	Selectivity_CO_product_based[%]	Selectivity_CO2_product_based[%]	Selectivity_Acetic_Acid_product_based[%]
13.7589	300	1000	3	9	0	0	0	0.0637946	100	0	0	0
35.1812	350	1000	3	9	0	0	0	0.505953	100	0	0	0
58.1079	400	1000	3	9	0	0	0	2.94616	54.3555	37.6925	7.95201	0
79.5539	425	1000	3	9	0	0	0	6.51562	36.8073	50.3889	12.8039	0
101.091	450	1000	3	9	0	0	0.574458	12.2573	26.8198	56.9598	16.2204	0
120.975	425	1000	3	9	0	0	0.300489	6.51063	36.3605	48.4532	15.1863	0
140.801	400	1000	3	9	0	0	0.0136128	2.54625	57.4217	28.4064	14.1719	0
162.167	350	1000	3	9	0	0	0.171763	0.358646	100	0	0	0
202.04	300	1000	3	9	0	0	0	0	0	0	0	0
248.417	450	1000	3	9	0	0	0.51467	11.2595	28.2415	54.791	16.9675	0
272.417	450	2000	3	9	0	0	0.234623	5.20421	45.2441	39.913	14.843	0
295.631	450	5000	3	9	0	0	0	1.34791	91.7148	0	8.28525	0
324.617	450	500	3	9	0	0	0.350478	18.6981	18.4321	59.2847	22.2832	0
Sample	V2O5
Modification	MnOx
Weight	1.037	g
Volume	1	ml
TOS[h]	Temperature_measured[°C]	GHSV[h-1]	Ethane_in[%vol]	Oxygen_in[%vol]	Steam_in[%vol]	Ethane_Conversion_direct[%]	Oxygen_Conversion[%]	Ethane_Conversion_product_based[%]	Selectivity_Ethylene_product_based[%]	Selectivity_CO_product_based[%]	Selectivity_CO2_product_based[%]	Selectivity_Acetic_Acid_product_based[%]
14.0619	300	1000	3	9	0	0	0.00780264	0.0403617	100	0	0	0
35.4868	350	1000	3	9	0	0	0.895224	1.19853	8.35429	0	91.6457	0
58.4149	400	1000	3	9	0	0.21755	2.19923	4.3402	18.333	0	81.667	0
79.8606	425	1000	3	9	0	0.0956377	2.06135	7.4253	24.4455	17.3194	58.2351	0
99.8592	450	1000	3	9	0	0.558846	2.32387	12.7656	23.1096	37.7911	39.0993	0
121.276	425	1000	3	9	0	0.445312	1.5182	6.95319	30.9752	30.6591	38.3658	0
141.104	400	1000	3	9	0	0	0.876023	2.99624	42.7444	6.72204	50.5335	0
160.942	350	1000	3	9	0	0	0.731259	0.591178	31.4013	0	68.5987	0
202.383	300	1000	3	9	0	0	0	0.585143	1.36743	2.15323	1.7425	0
248.417	450	1000	3	9	0	0	1.56705	11.488	26.2323	41.9321	31.8356	0
272.75	450	2000	3	9	0	0.243178	0.68708	5.2757	42.0344	30.3809	27.5848	0
295.917	450	5000	3	9	0	0	0	1.51038	76.6196	0	23.3804	0
325.117	450	500	3	9	0	1.15936	1.63765	18.852	18.3294	51.2674	30.4031	0
Sample	VPP
Modification	Base
Weight	0.9263	g
Volume	1	ml
TOS[h]	Temperature_measured[°C]	GHSV[h-1]	Ethane_in[%vol]	Oxygen_in[%vol]	Steam_in[%vol]	Ethane_Conversion_direct[%]	Oxygen_Conversion[%]	Ethane_Conversion_product_based[%]	Selectivity_Ethylene_product_based[%]	Selectivity_CO_product_based[%]	Selectivity_CO2_product_based[%]	Selectivity_Acetic_Acid_product_based[%]
14.6782	300	1000	3	9	0	3.47512	1.35621	3.36845	96.9735	0	3.02651	0
36.1005	350	1000	3	9	0	12.2419	6.00344	12.789	68.0905	17.2067	14.7028	0
59.0246	400	1000	3	9	0	31.2116	19.6452	34.898	42.3273	37.3583	20.3144	0
80.4742	425	1000	3	9	0	43.7405	30.1576	49.0006	32.0418	46.5521	21.4061	0
100.476	450	1000	3	9	0	59.5056	43.144	63.8077	22.8067	54.9802	22.2132	0
120.367	425	1000	3	9	0	42.242	28.8514	47.6196	33.4579	46.1442	20.3979	0
141.717	400	1000	3	9	0	28.7453	17.375	32.0474	45.9247	36.2143	17.8611	0
161.553	350	1000	3	9	0	10.3654	4.70593	10.3622	78.0758	12.6838	9.2404	0
202.96	300	1000	3	9	0	0	0	5.72939	95.964	2.8865	1.14946	0
249.25	450	1000	3	9	0	21.9071	11.3625	31.1223	46.8201	35.8946	17.2853	0
271.917	450	2000	3	9	0	15.1532	6.14698	19.9794	64.0219	25.8741	10.104	0
296.488	450	5000	3	9	0	7.20431	0.899192	9.93883	87.9005	8.53229	3.56725	0
325.517	450	500	3	9	0	29.9495	20.2224	43.5068	33.2795	41.3222	25.3983	0
Sample	VPP
Modification	POx
Weight	0.8795	g
Volume	1	ml
TOS[h]	Temperature_measured[°C]	GHSV[h-1]	Ethane_in[%vol]	Oxygen_in[%vol]	Steam_in[%vol]	Ethane_Conversion_direct[%]	Oxygen_Conversion[%]	Ethane_Conversion_product_based[%]	Selectivity_Ethylene_product_based[%]	Selectivity_CO_product_based[%]	Selectivity_CO2_product_based[%]	Selectivity_Acetic_Acid_product_based[%]
40.4699	300	1000	3	9	0	1.13219	0.461171	1.16741	100	0	0	0
60.5806	350	1000	3	9	0	5.30337	1.62959	4.11484	100	0	0	0
83.6994	400	1000	3	9	0	11.8076	4.84193	11.2716	75.0484	19.483	5.4686	0
106.72	425	1000	3	9	0	18.3466	9.36776	19.1596	58.9406	31.7494	9.30993	0
126.664	450	1000	3	9	0	31.7954	19.7452	33.6349	43.0893	44.1345	12.7762	0
146.595	425	1000	3	9	0	20.8956	11.424	22.1502	56.5869	32.8982	10.5149	0
166.565	400	1000	3	9	0	13.0562	5.80305	12.8907	72.3912	19.893	7.71576	0
186.635	350	1000	3	9	0	3.94829	1.4746	3.58059	100	0	0	0
206.772	300	1000	3	9	0	0	0.409249	0.86055	100	0	0	0
307.34	450	1000	3	9	0	14.4627	6.46093	15.3787	68.5119	23.0202	8.46797	0
328.806	450	2000	3	9	0	8.60318	2.81613	7.96707	91.2244	5.95156	2.82405	0
350.249	450	5000	3	9	0	4.01146	0.831688	4.16279	100	0	0	0
379.351	450	500	3	9	0	21.4445	11.879	23.7836	53.1189	33.1812	13.6819	0.018037
Sample	VPP
Modification	BOx
Weight	0.9179	g
Volume	1	ml
TOS[h]	Temperature_measured[°C]	GHSV[h-1]	Ethane_in[%vol]	Oxygen_in[%vol]	Steam_in[%vol]	Ethane_Conversion_direct[%]	Oxygen_Conversion[%]	Ethane_Conversion_product_based[%]	Selectivity_Ethylene_product_based[%]	Selectivity_CO_product_based[%]	Selectivity_CO2_product_based[%]	Selectivity_Acetic_Acid_product_based[%]
14.3675	300	1000	3	9	0	3.09605	1.13119	2.83599	99.5555	0	0.444509	0
35.7899	350	1000	3	9	0	9.94034	4.30939	10.4044	75.8568	15.4219	8.72129	0
58.7176	400	1000	3	9	0	26.0065	13.889	29.59	51.7197	36.3845	11.8957	0
80.1674	425	1000	3	9	0	40.7199	24.8912	45.7922	38.1782	46.6914	15.1304	0
100.17	450	1000	3	9	0	57.5786	40.8598	63.6071	25.2379	56.4306	18.3314	0
121.576	425	1000	3	9	0	44.0581	29.7116	49.0544	33.5714	48.241	18.1877	0
141.411	400	1000	3	9	0	30.5286	18.5328	33.7632	44.6244	38.7963	16.5793	0
161.243	350	1000	3	9	0	11.3586	5.26262	11.2464	74.9799	14.852	10.1681	0
202.673	300	1000	3	9	0	0	0	6.01002	95.938	3.01993	1.04204	0
248.417	450	1000	3	9	0	23.7373	12.7402	32.9168	45.0735	38.6673	16.2593	0
271.917	450	2000	3	9	0	16.7789	7.31181	21.5705	61.6341	27.4644	10.9015	0
295.917	450	5000	3	9	0	8.23142	1.47887	10.9498	85.1693	10.3404	4.49036	0
325.417	450	500	3	9	0	33.0368	21.7666	45.4679	31.8049	46.6551	21.5399	0
Sample	VPP
Modification	MnOx
Weight	1.0966	g
Volume	1	ml
TOS[h]	Temperature_measured[°C]	GHSV[h-1]	Ethane_in[%vol]	Oxygen_in[%vol]	Steam_in[%vol]	Ethane_Conversion_direct[%]	Oxygen_Conversion[%]	Ethane_Conversion_product_based[%]	Selectivity_Ethylene_product_based[%]	Selectivity_CO_product_based[%]	Selectivity_CO2_product_based[%]	Selectivity_Acetic_Acid_product_based[%]
40.7795	300	1000	3	9	0	0.639003	0.29203	0.252727	100	0	0	0
60.8891	350	1000	3	9	0	4.90761	0.882293	1.22853	100	0	0	0
84.0068	400	1000	3	9	0	9.88165	5.35948	9.2033	57.7861	27.0841	15.1299	0
105.493	425	1000	3	9	0	20.1465	13.5452	21.1851	39.5736	41.9253	18.5011	0
126.971	450	1000	3	9	0	34.3644	26.3103	36.5489	27.0524	51.2889	21.6587	0
146.902	425	1000	3	9	0	23.8111	16.5487	24.7753	36.4063	44.9746	18.619	0
166.872	400	1000	3	9	0	14.9124	9.36614	15.1127	47.7412	36.1339	16.1249	0
186.944	350	1000	3	9	0	5.79564	2.65039	3.77705	85.7341	3.75902	10.5069	0
207.081	300	1000	3	9	0	0	0.672096	0.884944	100	0	0	0
307.647	450	1000	3	9	0	3.24441	2.11656	3.55693	61.6176	10.3459	28.0253	0.0112098
329.112	450	2000	3	9	0	2.92671	0.974422	1.59633	83.4985	0	16.5015	0
350.555	450	5000	3	9	0	0.454319	0.118826	0.637369	100	0	0	0
379.657	450	500	3	9	0	6.58282	5.35763	8.61109	36.615	32.736	30.649	0
Sample	SmMnO3
Modification	Base
Weight	0.9434	g
Volume	1	ml
TOS[h]	Temperature_measured[°C]	GHSV[h-1]	Ethane_in[%vol]	Oxygen_in[%vol]	Steam_in[%vol]	Ethane_Conversion_direct[%]	Oxygen_Conversion[%]	Ethane_Conversion_product_based[%]	Selectivity_Ethylene_product_based[%]	Selectivity_CO_product_based[%]	Selectivity_CO2_product_based[%]	Selectivity_Acetic_Acid_product_based[%]
15.9887	250	1000	3	9	0	8.58092	11.5128	9.71438	0	0	99.8376	0.162369
35.9529	300	1000	3	9	0	36.5416	40.5512	34.4607	0.193034	0	99.7259	0.0810975
57.3077	350	1000	3	9	0	70.329	85.8206	72.2711	0.135043	0	99.7815	0.0834755
80.1576	375	1000	3	9	0	80.9436	97.8956	82.239	0.10683	0	99.7959	0.0972367
99.9674	375	1000	3	9	0	79.411	97.7109	82.0909	0.113742	0	99.7886	0.0976344
119.86	350	1000	3	9	0	68.0853	84.109	71.0835	0.172181	0	99.7221	0.105704
141.217	325	1000	3	9	0	58.0572	69.3603	52.8707	0.27007	0	99.6347	0.0952664
161.199	300	1000	3	9	0	59.3626	71.6403	33.4626	0.31335	0	99.6023	0.0843732
205.749	250	1000	3	9	0	9.34401	11.0171	8.46204	0	0	99.8523	0.147706
279.096	300	1000	3	9	0	28.1438	36.2768	32.1644	0.338032	0	99.574	0.0879432
302.011	300	2000	3	9	0	18.4222	23.1015	20.5994	0.662922	0	99.2531	0.0840089
326.462	300	5000	3	9	0	8.11222	13.7404	12.7465	1.06033	0	98.8967	0.0430001
355.492	300	500	3	9	0	35.1747	42.8449	38.5266	0.0173271	0	99.8995	0.0831242
Sample	SmMnO3
Modification	POx
Weight	0.9264	g
Volume	1	ml
TOS[h]	Temperature_measured[°C]	GHSV[h-1]	Ethane_in[%vol]	Oxygen_in[%vol]	Steam_in[%vol]	Ethane_Conversion_direct[%]	Oxygen_Conversion[%]	Ethane_Conversion_product_based[%]	Selectivity_Ethylene_product_based[%]	Selectivity_CO_product_based[%]	Selectivity_CO2_product_based[%]	Selectivity_Acetic_Acid_product_based[%]
40.468	250	1000	3	9	0	5.88908	5.4347	4.31037	0	0	100	0
60.5822	300	1000	3	9	0	18.1076	22.5341	19.1986	0.567153	0	99.4328	0
83.6967	350	1000	3	9	0	48.6158	59.4719	50.5459	0.503689	0	99.4963	0
106.721	375	1000	3	9	0	65.3448	79.1407	66.6484	0.357003	0	99.643	0
126.663	400	1000	3	9	0	77.782	94.1544	78.8754	0.269902	0	99.7301	0
146.593	375	1000	3	9	0	63.8905	78.2225	65.8432	0.386058	0	99.6139	0
166.568	350	1000	3	9	0	45.7702	55.9802	47.5257	0.533917	0	99.4661	0
188.18	300	1000	3	9	0	20.2455	19.3666	16.3447	0.465732	0	99.5343	0
208.319	250	1000	3	9	0	0	4.38041	3.46658	0	0	100	0
307.34	275	1000	3	9	0	6.2763	9.05287	8.598	0.0480688	0	99.911	0.0408995
327.274	275	2000	3	9	0	3.5449	5.35862	4.85808	0.00255435	0	99.9709	0.0265014
351.78	275	5000	3	9	0	1.57982	2.52378	2.36804	0	0	100	0
380.883	275	500	3	9	0	10.1812	14.0688	13.5397	0.0579333	0	99.8676	0.0744514
Sample	SmMnO3
Modification	BOx
Weight	1.014	g
Volume	1	ml
TOS[h]	Temperature_measured[°C]	GHSV[h-1]	Ethane_in[%vol]	Oxygen_in[%vol]	Steam_in[%vol]	Ethane_Conversion_direct[%]	Oxygen_Conversion[%]	Ethane_Conversion_product_based[%]	Selectivity_Ethylene_product_based[%]	Selectivity_CO_product_based[%]	Selectivity_CO2_product_based[%]	Selectivity_Acetic_Acid_product_based[%]
16.6032	250	1000	3	9	0	1.38036	1.96713	1.43511	0	0	99.0998	0.900224
36.5615	300	1000	3	9	0	6.2907	8.30673	7.31545	1.07949	0	98.6197	0.30086
57.9179	350	1000	3	9	0	20.7438	26.9182	23.8271	1.50974	0	98.4038	0.0864944
79.2438	400	1000	3	9	0	51.5485	62.9456	54.2288	1.08459	0	98.798	0.1174
100.579	425	1000	3	9	0	65.9261	81.822	69.9145	0.81068	0	99.0864	0.102878
120.474	400	1000	3	9	0	48.8717	62.3317	53.5197	1.04448	0	98.8456	0.109942
140.298	350	1000	3	9	0	34.4842	42.0225	36.3819	1.24854	0	98.6534	0.0980883
161.818	300	1000	3	9	0	22.3569	25.4561	21.9538	1.33387	0	98.5815	0.084613
206.364	250	1000	3	9	0	5.79448	6.37785	5.25263	0.384689	0	99.5234	0.0918846
278.182	300	1000	3	9	0	1.34588	4.05416	5.07022	0.432562	0	99.3303	0.237154
301.092	300	2000	3	9	0	0.959415	2.52584	2.82059	0	0	99.819	0.181027
327.072	300	5000	3	9	0	0	1.65635	1.93233	0	0	99.9731	0.0269096
356.104	300	500	3	9	0	3.78678	5.646	6.67003	0	0	99.7502	0.249757
Sample	SmMnO3
Modification	MnOx
Weight	1.0019	g
Volume	1	ml
TOS[h]	Temperature_measured[°C]	GHSV[h-1]	Ethane_in[%vol]	Oxygen_in[%vol]	Steam_in[%vol]	Ethane_Conversion_direct[%]	Oxygen_Conversion[%]	Ethane_Conversion_product_based[%]	Selectivity_Ethylene_product_based[%]	Selectivity_CO_product_based[%]	Selectivity_CO2_product_based[%]	Selectivity_Acetic_Acid_product_based[%]
16.9106	250	1000	3	9	0	10.5175	13.4188	11.3218	0	0	99.9416	0.058443
36.8678	300	1000	3	9	0	38.4189	47.5104	40.4282	0.187301	0	99.7523	0.060374
58.2227	350	1000	3	9	0	76.3136	92.7214	77.9099	0.067249	0	99.8896	0.043192
79.5483	350	1000	3	9	0	76.5337	92.8285	78.1155	0.0703919	0	99.8934	0.0362533
99.3559	350	1000	3	9	0	75.1732	92.7857	78.1428	0.0710227	0	99.8989	0.0301138
120.78	325	1000	3	9	0	58.0732	72.3112	61.5265	0.148971	0	99.8169	0.0340873
140.604	300	1000	3	9	0	38.8462	47.3146	40.4838	0.235089	0	99.7311	0.0338022
160.584	275	1000	3	9	0	21.1188	26.42	22.6133	0.187779	0	99.7998	0.0124609
206.671	250	1000	3	9	0	10.4087	12.5836	10.5785	0	0	99.9977	0.00232842
278.487	300	1000	3	9	0	35.2515	44.67	39.0442	0.250622	0	99.7084	0.0409388
301.398	300	2000	3	9	0	25.1699	32.1222	27.82	0.480597	0	99.4894	0.0300075
325.853	300	5000	3	9	0	12.0992	18.622	16.9503	0.92637	0	99.0712	0.00247223
356.411	300	500	3	9	0	43.1617	51.6385	46.0244	0	0	99.9627	0.0372997
Propane_Selective_Oxidation
Sample	MoVTeNbOx
Modification	Base
Weight	1.1197	g
Volume	1	ml
TOS[h]	Temperature_measured[°C]	GHSV[h-1]	Propane_in[%vol]	Oxygen_in[%vol]	Steam_in[%vol]	Propane_Conversion_direct[%]	Oxygen_Conversion[%]	Propane_Conversion_product_based[%]	Selectivity_Ethane_product_based[%]	Selectivity_Ethene_product_based[%]	Selectivity_CO_product_based[%]	Selectivity_CO2_product_based[%]	Selectivity_Acetic_Acid_product_based[%]	Selectivity_Acrylic_Acid_product_based[%]	Selectivity_Furan_product_based[%]	Selectivity_Acetaldehyde_product_based[%]	Selectivity_Propene_product_based[%]
44.7364	251.825	1000	3	9	20	11.0994	7.52387	13.4619	0.295138	0.136945	14.0799	5.63737	23.0176	49.2252	0.00359845	0.0178169	7.18776
58.2575	301.89	1000	3	9	20	31.3636	25.689	36.3601	0.114541	0.0469509	9.74762	7.0767	18.2455	60.3988	0.000713932	0.0202152	4.0357
70.7924	352.765	1000	3	9	20	62.3389	61.5736	66.713	0.158109	0.0600483	17.3407	15.25	12.2456	52.7621	0.000190225	0.0286917	1.87046
152.193	378.504	1000	3	9	20	75.288	84.4595	77.6507	0.217205	0.0899192	26.4443	23.6682	8.51499	39.5298	0	0.0270513	1.25765
198.195	378.521	1000	3	9	20	75.5365	84.4306	78.0086	0.218023	0.091592	26.3168	23.6666	9.03637	39.1616	0	0.0197927	1.24339
210.741	352.746	1000	3	9	20	63.1883	61.1855	67.3225	0.162861	0.0613425	17.0691	14.7509	12.0713	53.774	0	0.00937451	1.83021
223.659	327.184	1000	3	9	20	47.119	40.4591	52.5191	0.135216	0.0542959	11.5726	9.02356	14.7174	61.4662	0.000313023	0.00104015	2.76902
236.836	301.818	1000	3	9	20	31.3568	24.7167	36.5674	0.125553	0.051093	9.82892	6.15787	17.1507	62.3574	0.000430758	0	4.06182
250.58	251.774	1000	3	9	20	11.9104	7.6719	12.787	0.281397	0.0987808	10.5779	4.82631	24.224	51.9507	0.00286734	0	7.64989
856.695	301.809	1000	3	9	20	31.8163	24.2549	38.3995	0.108896	0.0533825	9.1225	5.66713	17.0517	63.7088	0.000350654	0	3.99799
876.961	301.863	2000	3	9	20	19.0678	13.2757	22.4361	0.178898	0.0781116	8.15824	4.11934	15.4013	64.0293	0.00210551	0	7.76415
897.348	301.899	4000	3	9	20	12.827	6.59497	13.8315	0.281867	0.179823	13.0728	2.72378	13.0738	58.334	0.00322951	0	12.0461
925.733	301.71	500	3	9	20	48.6198	42.2673	54.3936	0.0864822	0.0553093	10.9289	8.75079	19.2503	58.5059	0.00106833	0.015818	2.04611
Sample	MoVTeNbOx
Modification	POx
Weight	1.134	g
Volume	1	ml
TOS[h]	Temperature_measured[°C]	GHSV[h-1]	Propane_in[%vol]	Oxygen_in[%vol]	Steam_in[%vol]	Propane_Conversion_direct[%]	Oxygen_Conversion[%]	Propane_Conversion_product_based[%]	Selectivity_Ethane_product_based[%]	Selectivity_Ethene_product_based[%]	Selectivity_CO_product_based[%]	Selectivity_CO2_product_based[%]	Selectivity_Acetic_Acid_product_based[%]	Selectivity_Acrylic_Acid_product_based[%]	Selectivity_Furan_product_based[%]	Selectivity_Acetaldehyde_product_based[%]	Selectivity_Propene_product_based[%]
45.062	252.11	1000	3	9	20	0.834981	0.691369	1.53082	1.2919	0	0.0400433	4.5395	17.3741	40.5848	0.0499116	0.148386	34.1593
58.5906	301.723	1000	3	9	20	5.05761	3.55892	7.08465	0.301055	0.134099	18.8835	4.29746	14.7623	43.587	0	0.130164	17.5289
71.1228	351.497	1000	3	9	20	15.1673	11.956	19.6221	0.27489	0.118048	12.5189	5.95328	14.497	56.9963	0.00114656	0.121787	9.29296
152.522	376.728	1000	3	9	20	34.5847	30.2881	40.1368	0.207535	0.0837826	15.8068	9.55525	11.9852	57.6459	0.0018695	0.0683146	4.47458
198.523	402.727	1000	3	9	20	75.7433	81.3535	78.9939	0.312729	0.106638	25.9769	18.9787	8.52934	44.6342	0.000364318	0.0387493	1.23034
211.068	377.363	1000	3	9	20	62.0662	57.3711	67.1385	0.203251	0.0746085	16.0351	11.414	11.8613	58.2071	0.00111132	0.0215852	1.98392
223.987	352.089	1000	3	9	20	45.3827	36.6326	51.4577	0.153267	0.0626886	10.9741	6.56093	13.6283	65.2813	0.00222888	0.00697491	3.18137
237.163	301.978	1000	3	9	20	18.6448	14.1002	22.9828	0.16667	0.0842154	9.4864	2.66701	16.9821	63.6272	0.00168745	0	6.7928
250.905	252.159	1000	3	9	20	6.46647	3.92684	7.15618	0.198027	0.00832871	13.4933	1.49764	20.1304	52.1585	0.0116079	0	12.1399
857.02	301.971	1000	3	9	20	20.8715	13.9045	25.6173	0.154685	0.0812142	8.46718	2.60264	17.5417	64.8039	0.00247652	0	6.1404
877.289	301.977	2000	3	9	20	12.2129	7.33414	14.8399	0.208275	0.0775266	9.43842	1.66581	14.2279	62.3344	0.00197084	0	11.8065
897.674	301.985	4000	3	9	20	7.35505	4.32439	7.82585	0.289618	0.0297457	0.00535885	1.02803	12.123	63.2665	0.0182795	0	22.6946
926.059	301.996	500	3	9	20	33.9515	27.0202	39.6175	0.101288	0.0691292	9.59268	4.77416	20.1792	61.8668	0.00139651	0.0180346	3.2351
Sample	MoVTeNbOx
Modification	BOx
Weight	1.1585	g
Volume	1	ml
TOS[h]	Temperature_measured[°C]	GHSV[h-1]	Propane_in[%vol]	Oxygen_in[%vol]	Steam_in[%vol]	Propane_Conversion_direct[%]	Oxygen_Conversion[%]	Propane_Conversion_product_based[%]	Selectivity_Ethane_product_based[%]	Selectivity_Ethene_product_based[%]	Selectivity_CO_product_based[%]	Selectivity_CO2_product_based[%]	Selectivity_Acetic_Acid_product_based[%]	Selectivity_Acrylic_Acid_product_based[%]	Selectivity_Furan_product_based[%]	Selectivity_Acetaldehyde_product_based[%]	Selectivity_Propene_product_based[%]
45.3877	252.39	1000	3	9	20	10.1955	7.38971	13.2946	0.31101	0.166805	12.1824	4.81631	22.8198	51.6712	0.00403679	0.0180764	7.5936
58.9233	302.264	1000	3	9	20	31.3887	24.8491	37.1228	0.12045	0.0524546	8.83986	5.96248	17.3083	63.2572	0.000966411	0.0150719	4.16327
71.4535	352.864	1000	3	9	20	67.9127	63.6395	72.4562	0.142691	0.0556201	14.6257	12.5891	11.6699	59.0718	0.000567382	0.02256	1.56685
152.85	378.432	1000	3	9	20	83.04	89.8942	85.2966	0.213101	0.0847204	23.2537	20.6892	8.56791	46.0894	0	0.0301986	0.831634
198.85	378.513	1000	3	9	20	83.4627	90.9832	85.8863	0.213703	0.0862575	23.4126	20.8481	8.39336	45.9752	0	0.0291561	0.798217
211.395	352.884	1000	3	9	20	68.6595	63.5222	73.3485	0.140802	0.0564316	14.0029	11.7563	11.1903	61.0354	0.000179151	0.00862596	1.57326
224.314	327.451	1000	3	9	20	49.6879	40.7879	56.0114	0.116428	0.0515176	9.71617	7.21717	13.1893	66.802	0.000219644	0.000840154	2.68915
237.489	302.242	1000	3	9	20	31.8271	24.8108	38.0267	0.111682	0.0471059	7.77529	5.08161	15.8046	66.764	0	0	4.19337
251.231	252.343	1000	3	9	20	10.2224	6.6833	12.844	0.272922	0.0854829	10.012	4.21084	21.9968	54.7906	0.00178178	0.00506704	8.28584
857.346	302.222	1000	3	9	20	31.5713	23.073	38.3012	0.0939154	0.0398875	7.41683	4.87875	16.1375	66.9593	0.00173075	0	4.22645
877.617	302.242	2000	3	9	20	18.0184	12.1764	22.3881	0.134481	0.0929187	6.48664	3.24474	14.0763	67.0156	0.00228257	0	8.73255
898	302.241	4000	3	9	20	12.6428	6.23065	12.7819	0.210754	0.0558973	7.48007	2.14344	11.296	62.3364	0.00931069	0	16.1619
926.384	302.177	500	3	9	20	50.0939	42.7746	56.1204	0.0815749	0.0534903	10.3499	7.95314	18.0454	61.1007	0.000614909	0.0138433	2.07046
Sample	MoVTeNbOx
Modification	MnOx
Weight	1.1226	g
Volume	1	ml
TOS[h]	Temperature_measured[°C]	GHSV[h-1]	Propane_in[%vol]	Oxygen_in[%vol]	Steam_in[%vol]	Propane_Conversion_direct[%]	Oxygen_Conversion[%]	Propane_Conversion_product_based[%]	Selectivity_Ethane_product_based[%]	Selectivity_Ethene_product_based[%]	Selectivity_CO_product_based[%]	Selectivity_CO2_product_based[%]	Selectivity_Acetic_Acid_product_based[%]	Selectivity_Acrylic_Acid_product_based[%]	Selectivity_Furan_product_based[%]	Selectivity_Acetaldehyde_product_based[%]	Selectivity_Propene_product_based[%]
45.7139	251.55	1000	3	9	20	0.786346	0	2.04099	1.02655	0	10.1579	8.15136	8.80648	31.6864	0.00644926	0.00407211	38.7541
59.2559	301.181	1000	3	9	20	1.83054	3.68916	7.14808	0.532157	0.366674	21.501	11.9537	10.0032	27.8369	0.007306	0.0728589	27.3585
71.7852	351.148	1000	3	9	20	33.9236	40.2717	38.251	0.190681	0.375747	29.3558	28.914	13.8735	20.2313	0.000494196	0.0761603	6.75043
153.179	376.332	1000	3	9	20	68.8344	86.2913	71.6661	0.195492	0.172551	32.1978	32.2014	11.8951	21.028	0	0.0296288	1.89432
199.177	401.331	1000	3	9	20	76.0364	100	79.0123	0.200358	0.249507	35.1965	35.6742	10.7412	16.0099	0	0.430959	1.39959
211.722	376.375	1000	3	9	20	73.4408	90.658	75.9375	0.20464	0.158815	31.4668	31.3131	15.5242	19.2225	0.000778095	0.0321045	1.63064
224.641	351.264	1000	3	9	20	58.1951	62.1675	62.5672	0.155296	0.160592	21.7853	21.2907	19.7992	33.631	0.000707083	0.0205809	2.56462
237.815	301.334	1000	3	9	20	25.1428	21.5366	30.3166	0.15907	0.206623	11.5997	9.15055	18.8415	53.3578	0.00184882	0	6.10037
251.557	251.56	1000	3	9	20	8.88638	5.4456	10.5401	0.378486	0.208523	13.6575	5.01053	20.0141	48.8414	0	0	11.3109
857.672	301.367	1000	3	9	20	25.6168	20.7694	30.8708	0.143417	0.21286	12.1311	9.0264	19.2512	52.5616	0.00499231	0	6.07079
877.945	301.331	2000	3	9	20	15.1243	10.9401	18.3586	0.193914	0.211117	10.5982	6.11732	16.2191	54.6407	0.00141985	0	11.5293
898.326	301.311	4000	3	9	20	8.715	5.55051	10.6992	0.320192	0.217722	11.3225	3.81337	12.7174	51.1644	0.0119448	0	20.0842
926.709	301.314	500	3	9	20	40.8718	39.0171	46.5884	0.0920811	0.212969	14.5048	13.5358	21.952	45.7381	0.00134572	0.0271709	3.14592
Sample	MoVOx
Modification	Base
Weight	0.9561	g
Volume	1	ml
TOS[h]	Temperature_measured[°C]	GHSV[h-1]	Propane_in[%vol]	Oxygen_in[%vol]	Steam_in[%vol]	Propane_Conversion_direct[%]	Oxygen_Conversion[%]	Propane_Conversion_product_based[%]	Selectivity_Ethane_product_based[%]	Selectivity_Ethene_product_based[%]	Selectivity_CO_product_based[%]	Selectivity_CO2_product_based[%]	Selectivity_Acetic_Acid_product_based[%]	Selectivity_Acrylic_Acid_product_based[%]	Selectivity_Furan_product_based[%]	Selectivity_Acetaldehyde_product_based[%]	Selectivity_Propene_product_based[%]
46.0398	226.805	1000	3	9	20	20.8162	22.4424	24.012	0.0833767	0.0685179	30.8467	18.29	43.0037	5.67324	0.00051571	0.00411839	1.92497
59.588	252.211	1000	3	9	20	40.6145	46.2689	43.3329	0.0837138	0.0654833	34.3924	22.9872	36.0305	5.06684	0.000384261	0.00170368	1.27279
72.117	277.923	1000	3	9	20	62.0453	76.8573	64.9114	0.0391972	0.0533642	39.4753	28.0657	26.5259	5.04217	0	0.00143692	0.744231
153.508	303.474	1000	3	9	20	75.18	99.2014	77.7035	0.0305173	0.0426287	44.2593	32.4619	18.015	4.6922	0	0.00119559	0.475908
179.311	303.439	1000	3	9	20	75.4861	99.2677	78.0967	0.0310478	0.0472588	43.6818	31.8548	19.2739	4.62528	0	0.00419926	0.481684
212.049	303.41	1000	3	9	20	75.9774	99.2377	78.4472	0.0301256	0.0490555	43.2914	31.6302	19.7159	4.77482	0.000243898	0.00102383	0.481708
224.968	277.833	1000	3	9	20	63.3664	77.406	66.3525	0.0359231	0.063613	37.8064	27.0282	27.4508	6.7865	0	0	0.743564
238.141	252.194	1000	3	9	20	40.9485	46.0644	44.3318	0.0788084	0.08658	31.7459	22.3555	34.7331	9.49847	0.00133602	0	1.36423
251.882	226.789	1000	3	9	20	22.2319	22.8347	25.046	0.0680811	0.143231	27.9662	18.1347	40.4861	10.8258	0.00140663	0	2.19399
857.998	226.811	1000	3	9	20	21.2282	21.4282	25.2751	0.00716336	0.108776	26.1784	17.511	41.1523	12.6155	0.000912402	0.00263259	2.20929
878.273	226.873	2000	3	9	20	13.174	12.5434	15.9413	0.0287538	0.140657	26.0534	15.2846	39.3424	15.3243	0.00138312	0	3.65889
898.652	226.965	4000	3	9	20	8.73879	7.072	9.70612	0.0278181	0.301863	23.9664	12.9553	37.74	18.5056	0.00373744	0	6.09421
927.034	226.709	500	3	9	20	32.6745	36.261	36.7532	0.0411224	0.0730102	28.3203	20.2188	38.824	10.8968	0.000646122	0.00933515	1.45866
Sample	MoVOx
Modification	POx
Weight	1.0179	g
Volume	1	ml
TOS[h]	Temperature_measured[°C]	GHSV[h-1]	Propane_in[%vol]	Oxygen_in[%vol]	Steam_in[%vol]	Propane_Conversion_direct[%]	Oxygen_Conversion[%]	Propane_Conversion_product_based[%]	Selectivity_Ethane_product_based[%]	Selectivity_Ethene_product_based[%]	Selectivity_CO_product_based[%]	Selectivity_CO2_product_based[%]	Selectivity_Acetic_Acid_product_based[%]	Selectivity_Acrylic_Acid_product_based[%]	Selectivity_Furan_product_based[%]	Selectivity_Acetaldehyde_product_based[%]	Selectivity_Propene_product_based[%]
46.3663	228.253	1000	3	9	20	13.4429	13.9946	16.0496	0.0729675	0.0478705	27.1685	16.1141	42.3349	10.8198	0.00414561	0.00976771	3.25534
59.9194	253.485	1000	3	9	20	29.2019	32.4964	32.3052	0.118865	0.0788439	33.4479	20.622	35.1544	8.42474	0.000504159	0.0189325	1.9646
72.4493	279.312	1000	3	9	20	52.363	64.2189	55.4228	0.0520761	0.0590406	39.7046	26.4262	27.7539	4.85372	0.000614851	0.00996705	1.0375
153.836	305.32	1000	3	9	20	74.7015	97.9299	77.1565	0.031987	0.0453385	45.7376	31.1331	20.2337	2.30203	0	0.00541919	0.474321
179.638	305.369	1000	3	9	20	76.1385	98.9325	78.439	0.031851	0.0488156	45.12	30.353	21.6524	2.31073	0	0.00604641	0.434325
212.376	305.307	1000	3	9	20	76.4358	99.1554	78.7974	0.0309833	0.0525889	44.2226	30.0087	22.5772	2.62927	0	0.00646194	0.421391
225.295	279.644	1000	3	9	20	63.1037	75.603	66.0286	0.0366123	0.0692369	37.3422	25.3732	30.511	5.8202	0.000212334	0	0.705588
238.468	253.919	1000	3	9	20	40.2293	44.4713	44.0956	0.0832683	0.0917418	30.5866	20.2133	36.8711	10.6423	0.000582152	0	1.30707
252.208	228.501	1000	3	9	20	21.1997	21.6957	25.0035	0.044525	0.0771242	25.2263	16.2447	43.08	12.9363	0.00215922	0	2.19349
858.324	228.52	1000	3	9	20	21.4863	21.1219	25.2931	0.0183309	0.112042	24.7536	15.8115	44.0204	12.9478	0.00210383	0	2.11675
878.601	228.472	2000	3	9	20	14.0759	13.0599	16.4021	0	0.0752655	24.1578	13.4934	41.7262	16.8899	0.0068729	0	3.42801
898.978	228.531	4000	3	9	20	8.31121	7.2813	10.2312	0.0437162	0.193206	21.6493	11.1741	39.8209	20.9811	0.00782262	0	5.75702
927.36	228.204	500	3	9	20	33.028	35.6951	36.6038	0.0574137	0.0802239	27.4184	18.7339	42.7771	9.36526	0.00161392	0.0104078	1.35268
Sample	MoVOx
Modification	BOx
Weight	0.9603	g
Volume	1	ml
TOS[h]	Temperature_measured[°C]	GHSV[h-1]	Propane_in[%vol]	Oxygen_in[%vol]	Steam_in[%vol]	Propane_Conversion_direct[%]	Oxygen_Conversion[%]	Propane_Conversion_product_based[%]	Selectivity_Ethane_product_based[%]	Selectivity_Ethene_product_based[%]	Selectivity_CO_product_based[%]	Selectivity_CO2_product_based[%]	Selectivity_Acetic_Acid_product_based[%]	Selectivity_Acrylic_Acid_product_based[%]	Selectivity_Furan_product_based[%]	Selectivity_Acetaldehyde_product_based[%]	Selectivity_Propene_product_based[%]
46.6931	228.684	1000	3	9	20	21.0945	22.9039	24.6979	0.0480954	0.0509337	29.5895	17.8523	44.424	5.95398	0.00129872	0.0024079	1.97276
60.2506	254.651	1000	3	9	20	41.8674	48.195	44.6674	0.0859687	0.0642483	33.7783	22.961	37.4024	4.41553	0.000884355	0.00399326	1.2159
72.7824	280.96	1000	3	9	20	63.3744	79.1464	65.9316	0.0381536	0.051522	39.8464	28.3751	28.3018	2.655	0	0.00400895	0.691779
154.164	306.33	1000	3	9	20	71.327	99.9546	76.076	0.0246188	0.033047	43.5842	35.1067	19.4262	1.34209	0	0.00159625	0.481613
179.964	306.323	1000	3	9	20	75.0304	100	78.065	0.0305392	0.0447858	44.2263	32.4602	21.2584	1.53416	0	0.00141365	0.443798
212.703	306.32	1000	3	9	20	74.701	99.9526	77.8712	0.0298165	0.0483336	43.5265	32.0779	22.1409	1.72764	0	0.00368402	0.445324
225.622	280.811	1000	3	9	20	64.5271	79.5035	67.3253	0.0351549	0.0630656	38.0655	27.6791	29.8118	3.58202	0	0	0.693372
238.794	254.607	1000	3	9	20	42.106	48.2228	45.8815	0.080472	0.086261	31.869	22.458	37.0151	7.0913	0.00118236	0	1.2711
252.534	228.669	1000	3	9	20	22.124	23.2505	25.6771	0.0444268	0.0747976	26.6524	18.8419	42.5903	9.42201	0	0	2.1911
858.65	228.708	1000	3	9	20	23.0052	23.4032	26.5419	0.00711911	0.0689371	27.9358	18.072	42.6587	9.00522	0.00418522	0	2.04216
878.929	228.84	2000	3	9	20	14.3559	13.9207	16.799	0.0112784	0.140368	27.1167	15.7154	41.3563	12.0904	0.00318695	0	3.4646
899.304	229.011	4000	3	9	20	8.40247	7.77433	10.1321	0	0.0714819	24.6195	13.2677	40.1818	15.6146	0.0100289	0	5.84464
927.685	228.37	500	3	9	20	34.944	39.342	38.4163	0.00624339	0.0750192	29.4295	21.0111	41.484	6.54714	0.00327206	0.0098253	1.29726
Sample	MoVOx
Modification	MnOx
Weight	1.0248	g
Volume	1	ml
TOS[h]	Temperature_measured[°C]	GHSV[h-1]	Propane_in[%vol]	Oxygen_in[%vol]	Steam_in[%vol]	Propane_Conversion_direct[%]	Oxygen_Conversion[%]	Propane_Conversion_product_based[%]	Selectivity_Ethane_product_based[%]	Selectivity_Ethene_product_based[%]	Selectivity_CO_product_based[%]	Selectivity_CO2_product_based[%]	Selectivity_Acetic_Acid_product_based[%]	Selectivity_Acrylic_Acid_product_based[%]	Selectivity_Furan_product_based[%]	Selectivity_Acetaldehyde_product_based[%]	Selectivity_Propene_product_based[%]
16.5581	228.446	1000	3	9	20	15.8779	15.9815	17.2643	0.0733668	0.0562226	26.8593	13.1105	52.585	4.76016	0	0	2.26028
28.889	253.75	1000	3	9	20	29.7605	31.8943	31.9708	0.0766672	0.0903064	29.885	16.6594	46.8248	4.58206	0	0.0066831	1.72453
41.2293	279.379	1000	3	9	20	48.4628	55.4578	50.3175	0.0372808	0.0766321	33.7583	20.9438	40.5241	3.26964	0	0.010874	1.24826
56.3842	305.151	1000	3	9	20	66.5273	81.9735	67.2663	0.0277983	0.0675503	39.0774	26.6248	31.5948	1.67698	0	0.0136862	0.853928
134.569	304.985	1000	3	9	20	64.2538	78.8485	64.9943	0.0251858	0.0811256	38.2127	26.7239	31.9231	1.96075	0	0.00341796	0.987542
147.652	279.146	1000	3	9	20	44.8876	50.4049	46.1685	0.0396189	0.0986812	32.2847	21.1135	40.3576	4.31861	0	0.00262706	1.62419
160.985	253.566	1000	3	9	20	26.8652	27.576	27.7675	0.0760713	0.114812	28.317	16.9597	45.2182	6.60198	0	0.00355807	2.46199
174.974	228.308	1000	3	9	20	14.3064	12.7485	14.5154	0.113338	0.140293	24.7979	13.4472	50.3188	7.3802	0	0	3.48376
187.431	228.389	1000	3	9	20	13.9913	13.2196	14.6226	0.111877	0.132867	24.7459	13.6097	50.2343	7.37099	0	0	3.47176
210.47	228.428	1000	3	9	20	8.40411	7.62356	8.67615	0.263766	0.159757	22.9596	11.5151	50.0908	8.80113	0	0	5.62666
332.907	228.45	2000	3	9	20	8.24404	7.72622	9.02178	0.232919	0.204399	23.3199	11.7233	50.097	8.49916	0	0	5.36213
352.128	228.469	4000	3	9	20	6.06441	5.36653	6.42846	0.306121	0.162922	22.1506	10.5973	49.0815	9.4874	0	0	7.39933
397.832	228.366	500	3	9	20	13.9926	13.6936	15.1361	0.14151	0.152926	25.01	13.8273	50.0486	7.16938	0	0	3.3285
Sample	MoO3
Modification	Base
Weight	1.3971	g
Volume	1	ml
TOS[h]	Temperature_measured[°C]	GHSV[h-1]	Propane_in[%vol]	Oxygen_in[%vol]	Steam_in[%vol]	Propane_Conversion_direct[%]	Oxygen_Conversion[%]	Propane_Conversion_product_based[%]	Selectivity_Ethane_product_based[%]	Selectivity_Ethene_product_based[%]	Selectivity_CO_product_based[%]	Selectivity_CO2_product_based[%]	Selectivity_Acetic_Acid_product_based[%]	Selectivity_Acrylic_Acid_product_based[%]	Selectivity_Furan_product_based[%]	Selectivity_Acetaldehyde_product_based[%]	Selectivity_Propene_product_based[%]
17.3539	300.581	1000	3	9	20	0.847623	0.313345	0.354575	0	0	12.428	22.3267	24.2428	0	0.237963	0	27.0759
29.8352	350.18	1000	3	9	20	2.05572	0.823701	0.908626	0	0	23.0114	31.0729	4.997	0	0.137675	0	35.1697
42.2802	399.811	1000	3	9	20	2.80038	2.45368	2.35673	0	0.192149	31.9662	30.7013	0	0	0.0157956	0	35.0139
54.6172	424.614	1000	3	9	20	4.13515	4.04789	3.61366	0.0617329	0.559848	38.6552	27.8856	0	0	0.00742973	0	31.4698
66.9456	449.459	1000	3	9	20	7.67937	6.4304	5.60981	0.0289054	0.362417	45.29	27.1195	0	0	0.0132974	0	26.2613
79.3873	424.587	1000	3	9	20	3.86834	3.22525	3.10321	0	0.275934	39.0266	23.6407	0	0	0.0198127	0	35.7568
91.8053	399.743	1000	3	9	20	2.55287	1.67248	1.7373	0	0.219376	32.2465	20.9864	0.255552	0	0.0208714	0	44.2782
104.577	350.123	1000	3	9	20	0.590781	0.410036	0.607285	0	0	18.365	14.1701	15.2661	0	0.169935	0	46.2383
117.57	300.523	1000	3	9	20	0.783335	0.119711	0.268429	0	0	8.77396	8.57864	29.1374	0	0.853194	0	31.7483
130.301	449.449	1000	3	9	20	6.46419	5.67511	5.09993	0.0315704	0.370079	44.9331	24.9409	0.270149	0	0.0212905	0	28.4599
150.49	449.47	2000	3	9	20	3.08012	1.9269	2.44119	0	0.372254	31.8656	18.2726	0	0	0	0	47.2018
175.989	449.503	3000	3	9	20	2.62334	1.17812	1.61534	0	0.363146	23.9332	13.8315	1.10447	0	0.107796	0	57.4874
204.409	449.437	500	3	9	20	10.1786	11.4273	9.20645	0	0.427193	54.7558	27.3175	0	0	0.00771865	0	16.9232
Sample	MoO3
Modification	POx
Weight	1.4237	g
Volume	1	ml
TOS[h]	Temperature_measured[°C]	GHSV[h-1]	Propane_in[%vol]	Oxygen_in[%vol]	Steam_in[%vol]	Propane_Conversion_direct[%]	Oxygen_Conversion[%]	Propane_Conversion_product_based[%]	Selectivity_Ethane_product_based[%]	Selectivity_Ethene_product_based[%]	Selectivity_CO_product_based[%]	Selectivity_CO2_product_based[%]	Selectivity_Acetic_Acid_product_based[%]	Selectivity_Acrylic_Acid_product_based[%]	Selectivity_Furan_product_based[%]	Selectivity_Acetaldehyde_product_based[%]	Selectivity_Propene_product_based[%]
17.6811	301.966	1000	3	9	20	1.03294	0.126971	0.20852	0	0	7.90268	19.1935	17.1807	0	0.446729	0	31.8136
30.1629	351.414	1000	3	9	20	0.764629	0.336097	0.464707	0	0.273781	13.2502	20.3022	4.32112	0	0.17553	0	51.2647
42.6065	400.994	1000	3	9	20	1.88894	1.29834	1.44159	0	0.623025	26.8224	23.755	0.344715	0	0.0266383	0	44.8217
54.9434	425.762	1000	3	9	20	3.55156	2.61531	2.55238	0.688425	1.08085	36.0053	24.0357	0	0	0.0748955	0	36.1752
67.2719	450.582	1000	3	9	20	7.58997	4.84068	4.34906	0.56468	1.13098	44.3108	24.1572	0.555084	0	0.0344222	0	28.1523
79.7127	425.75	1000	3	9	20	3.51978	2.17164	2.19732	0.498454	1.01382	34.4012	22.0165	0	0	0.0207925	0	40.9762
92.1306	400.956	1000	3	9	20	2.25877	1.01305	1.13176	0	0.619874	24.7222	18.941	0.466559	0	0.035272	0	52.4243
104.901	351.419	1000	3	9	20	0.428114	0.137315	0.353697	0	0	10.8126	12.8762	10.3495	0	0.264242	0	50.5829
117.895	301.919	1000	3	9	20	0.958081	0.058898	0.149113	0	0	7.1142	11.3128	21.4602	0	1.12958	0	29.8283
130.626	450.506	1000	3	9	20	5.75923	4.29739	3.99046	0.567196	1.13853	43.3941	22.8363	0.146451	0	0.00965723	0	30.6175
150.815	450.516	2000	3	9	20	2.96677	1.44172	1.8886	0	0.713187	27.5905	15.1996	0	0	0.0613465	0	53.8475
176.316	450.549	3000	3	9	20	2.31368	0.783386	1.37493	0	0.569936	18.848	9.25374	2.12405	0	0.0794658	0	65.5234
204.735	450.5	500	3	9	20	9.40454	9.36138	7.97332	0.0917225	0.875829	53.1139	24.2211	0.387678	0	0.0128283	0	20.602
Sample	MoO3
Modification	BOx
Weight	1.5336	g
Volume	1	ml
TOS[h]	Temperature_measured[°C]	GHSV[h-1]	Propane_in[%vol]	Oxygen_in[%vol]	Steam_in[%vol]	Propane_Conversion_direct[%]	Oxygen_Conversion[%]	Propane_Conversion_product_based[%]	Selectivity_Ethane_product_based[%]	Selectivity_Ethene_product_based[%]	Selectivity_CO_product_based[%]	Selectivity_CO2_product_based[%]	Selectivity_Acetic_Acid_product_based[%]	Selectivity_Acrylic_Acid_product_based[%]	Selectivity_Furan_product_based[%]	Selectivity_Acetaldehyde_product_based[%]	Selectivity_Propene_product_based[%]
18.0084	301.363	1000	3	9	20	0.939236	0.187203	0.253702	0	0	10.2318	21.4988	9.41018	0	1.00706	0	37.8309
30.4895	350.988	1000	3	9	20	1.33257	0.601373	0.733906	0	0	21.462	26.3236	1.75094	0	0.179982	0	43.3865
42.9324	400.63	1000	3	9	20	2.08109	1.96515	2.0232	0	0.211454	30.7294	26.6793	0	0	0.130422	0	40.1631
55.2695	425.44	1000	3	9	20	3.78278	3.50318	3.23387	0	0.261738	37.5796	26.4031	0	0	0.0133247	0	34.7012
67.5986	450.257	1000	3	9	20	7.04957	5.90458	6.8515	2.31305	1.72848	37.783	23.6875	0.832943	0	0.0120042	0	30.9063
80.0374	425.419	1000	3	9	20	4.69501	2.92104	2.85963	0	0.272425	37.3749	23.4513	0	0	0.0341196	0	37.7235
92.4563	400.595	1000	3	9	20	2.16398	1.42789	1.5806	0	0.236504	29.5566	20.3486	0	0	0.0805061	0	48.2493
105.225	350.974	1000	3	9	20	0.595119	0.357046	0.508654	0	1.40964	15.8219	14.8316	4.76093	0	0.109704	0	56.7705
118.22	301.355	1000	3	9	20	0.818553	0.0212833	0.183632	0	0	8.33487	11.9678	11.18	0	0.395391	0	43.1837
130.951	450.251	1000	3	9	20	5.82012	5.20361	4.80282	0	0.574164	44.4802	24.8233	0.159853	0	0.0115216	0	28.8925
151.141	450.258	2000	3	9	20	3.1341	2.00674	2.35956	0	0.841619	32.0441	17.9247	0	0	0.0218142	0	46.8921
176.643	450.261	3000	3	9	20	1.98406	1.23677	1.56177	0	0.353674	24.8263	12.69	1.00203	0	0.0133064	0	57.6677
205.062	450.25	500	3	9	20	9.56275	10.5146	8.53445	0	0.568648	54.7201	26.1625	0.13301	0	0.0185654	0	17.7644
Sample	MoO3
Modification	MnOx
Weight	1.4348	g
Volume	1	ml
TOS[h]	Temperature_measured[°C]	GHSV[h-1]	Propane_in[%vol]	Oxygen_in[%vol]	Steam_in[%vol]	Propane_Conversion_direct[%]	Oxygen_Conversion[%]	Propane_Conversion_product_based[%]	Selectivity_Ethane_product_based[%]	Selectivity_Ethene_product_based[%]	Selectivity_CO_product_based[%]	Selectivity_CO2_product_based[%]	Selectivity_Acetic_Acid_product_based[%]	Selectivity_Acrylic_Acid_product_based[%]	Selectivity_Furan_product_based[%]	Selectivity_Acetaldehyde_product_based[%]	Selectivity_Propene_product_based[%]
18.3359	301.502	1000	3	9	20	1.14569	0	0.19347	0	0	6.98958	23.2109	8.77153	0	0.462826	0	35.3358
30.8161	351.125	1000	3	9	20	0.787022	0.270688	0.582202	0	0	10.8885	23.3358	0	0	0.207933	0	57.0854
43.2589	400.75	1000	3	9	20	1.91126	1.11525	1.6086	0	0.244808	18.2346	24.2714	0	0	0.0870661	0	54.0441
55.5956	425.556	1000	3	9	20	3.09606	2.15701	2.61185	0.183804	0.436304	23.9711	23.4188	0	0	0.0542209	0	50.1029
67.9253	450.38	1000	3	9	20	4.87022	3.83137	7.99147	2.64511	2.10022	24.1781	19.6778	0	0	0.00539146	0	49.9371
80.3625	425.523	1000	3	9	20	3.59024	1.65024	2.22159	0.48322	0.5621	22.8676	19.9821	0	0	0.0456204	0	55.0603
92.7822	400.714	1000	3	9	20	2.15257	0.781439	1.19833	0	0.303258	16.5758	16.7647	0	0	0.113462	0	64.2475
105.549	351.078	1000	3	9	20	1.17118	0.0455865	0.480417	0	0	8.49604	11.3209	3.80297	0	0.176515	0	67.5096
118.545	301.46	1000	3	9	20	1.15078	0	0.170483	0	0	5.27491	10.5476	8.74833	0	0.209092	0	43.0536
131.276	450.343	1000	3	9	20	4.7502	3.46126	3.97762	0.52612	0.782248	30.1818	22.1791	0	0	0	0	45.0546
151.466	450.357	2000	3	9	20	2.3475	1.04429	1.90939	0.0828714	0.502626	19.5123	14.8404	0	0	0	0	62.4302
176.969	450.397	3000	3	9	20	1.53657	0.719889	1.26961	0	0.459225	14.6563	10.4549	0.368835	0	0.0742553	0	69.9938
205.389	450.332	500	3	9	20	7.66887	7.07078	6.80503	0.294625	0.660104	41.9507	24.3518	0.0959793	0	0.0157333	0	31.839
Sample	V2O5
Modification	Base
Weight	1.0323	g
Volume	1	ml
TOS[h]	Temperature_measured[°C]	GHSV[h-1]	Propane_in[%vol]	Oxygen_in[%vol]	Steam_in[%vol]	Propane_Conversion_direct[%]	Oxygen_Conversion[%]	Propane_Conversion_product_based[%]	Selectivity_Ethane_product_based[%]	Selectivity_Ethene_product_based[%]	Selectivity_CO_product_based[%]	Selectivity_CO2_product_based[%]	Selectivity_Acetic_Acid_product_based[%]	Selectivity_Acrylic_Acid_product_based[%]	Selectivity_Furan_product_based[%]	Selectivity_Acetaldehyde_product_based[%]	Selectivity_Propene_product_based[%]
16.0455	301.402	1000	3	9	20	6.15294	6.80615	5.6816	0	0.0258989	53.2561	20.7932	14.2462	0	0.0177485	0	10.9452
28.5271	351.216	1000	3	9	20	12.7209	15.8003	12.1521	0	0	64.9416	23.4151	3.66081	0	0.0137715	0	7.57021
40.9753	401.396	1000	3	9	20	28.9342	37.5132	28.0893	0	0.043847	72.4547	23.1685	0	0	0.00409909	0	4.09859
53.3141	426.564	1000	3	9	20	40.0938	52.3934	39.2683	0.00600073	0.0321621	74.5863	21.9263	0	0	0.00148579	0	3.26637
65.6414	451.723	1000	3	9	20	52.5948	67.6539	50.6656	0.0127591	0.0741919	75.7908	21.6014	0	0	0.00295208	0	2.45927
78.0861	426.331	1000	3	9	20	36.1252	45.7898	34.5654	0	0.0747123	74.8364	20.9196	0.0149828	0	0.0214159	0	3.80024
90.5038	401.073	1000	3	9	20	22.7588	28.2207	21.4817	0.01118	0.0578363	72.2341	20.7978	0.433719	0	0.00895968	0	5.71219
103.279	350.979	1000	3	9	20	7.49498	9.06767	7.5265	0	0	60.0994	18.8187	7.96093	0	0.0228446	0	11.3998
116.27	301.206	1000	3	9	20	3.0479	2.85498	2.55662	0	0	44.8992	14.3782	22.7886	0	0.118976	0	16.3444
129.001	426.337	1000	3	9	20	35.4731	44.8179	33.9162	0	0.0389964	75.0814	20.8425	0	0	0.00188614	0	3.87399
149.189	426.441	2000	3	9	20	21.4073	25.5168	19.9728	0	0.131629	72.4678	19.4819	0.0253769	0	0.00392828	0	7.62063
174.682	426.465	3000	3	9	20	15.3624	17.58	13.937	0	0.0932205	69.3093	18.474	0.330793	0	0	0	11.4218
203.102	426.055	500	3	9	20	49.0817	64.4829	47.7231	0	0.0458162	74.279	23.3186	0	0	0.000837506	0	2.28655
Sample	V2O5
Modification	POx
Weight	1.027	g
Volume	1	ml
TOS[h]	Temperature_measured[°C]	GHSV[h-1]	Propane_in[%vol]	Oxygen_in[%vol]	Steam_in[%vol]	Propane_Conversion_direct[%]	Oxygen_Conversion[%]	Propane_Conversion_product_based[%]	Selectivity_Ethane_product_based[%]	Selectivity_Ethene_product_based[%]	Selectivity_CO_product_based[%]	Selectivity_CO2_product_based[%]	Selectivity_Acetic_Acid_product_based[%]	Selectivity_Acrylic_Acid_product_based[%]	Selectivity_Furan_product_based[%]	Selectivity_Acetaldehyde_product_based[%]	Selectivity_Propene_product_based[%]
16.3722	301.541	1000	3	9	20	5.40677	2.38227	3.52864	0	0.0838268	18.5275	8.68434	19.4941	0.47615	0.017246	0	51.204
28.8544	351.289	1000	3	9	20	12.5418	10.4716	10.7254	0.0761118	0.279567	38.6105	17.5204	15.6568	0.15235	0.00798316	0	27.2927
41.3016	401.491	1000	3	9	20	27.6816	32.3487	25.5187	0.11669	0.284246	60.5077	27.1623	0.019661	0	0.00564947	0	11.6579
53.6397	426.636	1000	3	9	20	36.4798	45.8424	35.1431	0.0869218	0.27974	65.5903	26.2343	0.0209226	0	0.00742579	0	7.59574
65.9672	451.876	1000	3	9	20	48.8826	62.1427	46.7827	0.0673019	0.28081	69.0762	25.2493	0.0298324	0	0.00163174	0	5.11528
78.4116	426.533	1000	3	9	20	35.7243	42.9031	33.4011	0.106387	0.261203	65.7349	24.896	0	0	0.00252899	0	8.69553
90.829	401.343	1000	3	9	20	24.7402	27.6583	22.7749	0.111913	0.26208	59.538	22.5702	3.02035	0	0.00410023	0	13.8045
103.604	351.296	1000	3	9	20	12.1863	10.0793	11.148	0.0161027	0.154743	37.3493	12.1919	21.6773	0.559339	0.0137187	0	26.8416
116.595	301.589	1000	3	9	20	5.95802	3.39851	5.06506	0	0.0675163	22.4331	5.5686	28.4298	0.727057	0.00645655	0	41.6163
129.326	426.511	1000	3	9	20	35.3823	42.7567	33.3492	0.0860999	0.2556	65.6263	25.1644	0.0173255	0	0.00169846	0	8.69449
149.514	426.625	2000	3	9	20	23.5964	24.7424	20.7135	0.152871	0.314286	59.7569	22.7252	0.333882	0	0.00198787	0	16.4409
175.009	426.644	3000	3	9	20	18.4742	17.4418	15.3695	0.186842	0.340309	53.6398	20.2736	2.23267	0	0	0	22.9685
203.428	426.278	500	3	9	20	49.1093	64.0164	47.923	0.0430314	0.188546	68.7094	26.1713	0.0100749	0	0.00446749	0	4.81191
Sample	V2O5
Modification	BOx
Weight	0.9611	g
Volume	1	ml
TOS[h]	Temperature_measured[°C]	GHSV[h-1]	Propane_in[%vol]	Oxygen_in[%vol]	Steam_in[%vol]	Propane_Conversion_direct[%]	Oxygen_Conversion[%]	Propane_Conversion_product_based[%]	Selectivity_Ethane_product_based[%]	Selectivity_Ethene_product_based[%]	Selectivity_CO_product_based[%]	Selectivity_CO2_product_based[%]	Selectivity_Acetic_Acid_product_based[%]	Selectivity_Acrylic_Acid_product_based[%]	Selectivity_Furan_product_based[%]	Selectivity_Acetaldehyde_product_based[%]	Selectivity_Propene_product_based[%]
16.6995	301.513	1000	3	9	20	5.15504	4.35909	4.21872	0	0.0355313	45.8939	19.6223	17.9604	0	0.0313848	0	15.7246
29.1816	351.018	1000	3	9	20	9.90723	12.4301	9.17261	0	0.0330165	42.0038	44.8986	1.53603	0	0.00773578	0	11.1166
41.6276	400.94	1000	3	9	20	24.591	32.4012	23.7905	0.0152018	0.1126	62.2797	31.8835	0	0	0.00650563	0	5.45541
53.9655	426.077	1000	3	9	20	35.7796	47.7313	35.067	0	0.0385447	67.8115	27.8591	0	0	0.0024446	0	4.11101
66.2932	451.259	1000	3	9	20	49.7522	64.578	47.706	0	0.0971205	70.5526	26.1738	0	0	0.00206754	0	3.10939
78.7371	425.902	1000	3	9	20	32.7394	42.0485	31.5027	0	0.125046	70.0902	24.9005	0	0	0.00190639	0	4.58312
91.1545	400.701	1000	3	9	20	20.444	25.188	19.1267	0.0120781	0.189188	66.4252	25.7227	0.372778	0	0.00344245	0	6.5332
103.928	350.859	1000	3	9	20	6.61378	7.85034	6.70682	0	0.166161	48.6944	26.8491	10.0856	0.0499553	0.0113408	0	12.7066
116.92	301.376	1000	3	9	20	2.60569	2.08859	2.36069	0	0	39.8683	12.5461	27.8445	0	0.0420284	0	17.8383
129.651	425.935	1000	3	9	20	32.5009	41.2717	31.0914	0	0.127731	70.9139	24.2084	0	0	0.00124919	0	4.58977
149.84	426.111	2000	3	9	20	19.0538	22.74	17.9242	0	0.0727317	68.1351	22.7749	0.113253	0	0.00521945	0	8.60675
175.336	426.143	3000	3	9	20	14.0467	15.19	12.4424	0	0.0332729	64.8221	21.4843	0.410522	0	0	0	12.8503
203.755	425.608	500	3	9	20	47.0908	62.3093	45.919	0	0.0771127	71.2091	25.8794	0	0	0.000967937	0	2.76969
Sample	V2O5
Modification	MnOx
Weight	0.9204	g
Volume	1	ml
TOS[h]	Temperature_measured[°C]	GHSV[h-1]	Propane_in[%vol]	Oxygen_in[%vol]	Steam_in[%vol]	Propane_Conversion_direct[%]	Oxygen_Conversion[%]	Propane_Conversion_product_based[%]	Selectivity_Ethane_product_based[%]	Selectivity_Ethene_product_based[%]	Selectivity_CO_product_based[%]	Selectivity_CO2_product_based[%]	Selectivity_Acetic_Acid_product_based[%]	Selectivity_Acrylic_Acid_product_based[%]	Selectivity_Furan_product_based[%]	Selectivity_Acetaldehyde_product_based[%]	Selectivity_Propene_product_based[%]
17.0267	301.303	1000	3	9	20	5.39944	5.02341	4.33932	0	0	48.6393	22.3108	14.8304	0	0.0184582	0	13.6772
29.5085	351.058	1000	3	9	20	11.5836	14.0431	10.9143	0	0.101435	61.3389	25.3825	1.78692	0	0.00922331	0	10.9114
41.9538	400.899	1000	3	9	20	27.8275	35.6745	26.6814	0.00916145	0.113891	69.1505	25.123	0.0197611	0	0.00722743	0	5.3488
54.2912	425.835	1000	3	9	20	39.2251	50.6899	37.7516	0.0238403	0.0578671	72.3865	23.5955	0	0	0.00101143	0	3.7621
66.6193	450.791	1000	3	9	20	51.167	66.6127	49.25	0.0396079	0.0665625	74.1721	22.9899	0.0167442	0	0.00165569	0	2.65807
79.0622	425.794	1000	3	9	20	35.3072	44.6497	33.4619	0.0232223	0.0870384	73.3917	21.9042	0	0	0.00394642	0	4.2727
91.4798	400.818	1000	3	9	20	22.7502	28.1084	21.3785	0	0	70.8524	21.726	0.0961527	0	0.0109702	0	6.54184
104.253	351.002	1000	3	9	20	8.98346	9.4761	7.97148	0	0	58.7859	19.2781	7.27164	0	0.00796857	0	12.9875
117.245	301.275	1000	3	9	20	2.88366	2.57332	2.61271	0	0	42.8787	14.8383	20.9651	0	0.0727795	0	19.1034
129.976	425.807	1000	3	9	20	34.7545	43.8076	33.0151	0.0239617	0.0871305	73.6731	21.7407	0	0	0.00190002	0	4.31039
150.165	425.859	2000	3	9	20	20.7209	24.1176	19.229	0.0167918	0.0570314	70.7314	20.2596	0	0	0	0	8.6566
175.662	425.874	3000	3	9	20	14.772	16.4878	13.4121	0.023655	0.154823	67.1718	19.0981	0.181627	0	0.00159952	0	12.9815
204.082	425.742	500	3	9	20	48.5839	64.5577	47.5579	0	0.0800489	72.503	24.9015	0	0	0.00344859	0	2.43968
Sample	VPP
Modification	Base
Weight	0.8963	g
Volume	1	ml
TOS[h]	Temperature_measured[°C]	GHSV[h-1]	Propane_in[%vol]	Oxygen_in[%vol]	Steam_in[%vol]	Propane_Conversion_direct[%]	Oxygen_Conversion[%]	Propane_Conversion_product_based[%]	Selectivity_Ethane_product_based[%]	Selectivity_Ethene_product_based[%]	Selectivity_CO_product_based[%]	Selectivity_CO2_product_based[%]	Selectivity_Acetic_Acid_product_based[%]	Selectivity_Acrylic_Acid_product_based[%]	Selectivity_Furan_product_based[%]	Selectivity_Acetaldehyde_product_based[%]	Selectivity_Propene_product_based[%]
21.7598	301.008	1000	3	9	20	3.4198	2.36588	4.71392	0.470602	0.737478	29.4433	8.14262	26.551	5.65782	0.0226814	0	27.9076
34.1518	350.915	1000	3	9	20	13.9878	13.6266	14.9818	0.246966	1.78157	30.0504	16.3084	28.3318	12.1772	0.00596575	0	10.7696
46.5632	401.738	1000	3	9	20	38.1397	47.6501	38.8575	0.476248	2.22798	48.1326	29.063	10.8433	4.92314	0.00415756	0.850482	3.26382
58.8856	427.428	1000	3	9	20	53.8685	72.4028	54.2072	0.539345	2.15081	56.7748	33.6303	3.26534	0.769573	0	0.814891	1.8343
71.2344	452.97	1000	3	9	20	67.8306	93.0443	67.9911	0.378077	1.94101	61.8395	34.2512	0.140419	0.0467359	0.00427249	0.271255	1.07955
83.7256	427.546	1000	3	9	20	55.5275	73.9238	56.1902	0.41508	2.01649	57.0211	31.2455	4.57832	2.50411	0.00168555	0.471863	1.64043
96.2721	401.908	1000	3	9	20	41.4729	51.2876	42.2266	0.35104	2.05625	49.4426	25.8879	12.1075	6.76813	0.00113706	0	2.69673
109.065	350.982	1000	3	9	20	16.4158	16.0029	17.3175	0.2034	1.93984	30.5225	12.9981	32.3764	12.1527	0.0123729	0	8.36032
122.127	301.026	1000	3	9	20	4.29202	3.48179	5.06575	0.0338606	0.702571	28.8257	4.72073	33.9609	7.61348	0.00980712	0	23.1638
146.751	376.413	1000	3	9	20	29.8108	31.2422	29.9118	0.259007	2.1006	39.1702	19.5859	22.3583	10.0983	0.00201269	0	4.64905
167.011	376.57	2000	3	9	20	18.0847	16.9645	19.1225	0.291533	2.01951	31.5544	13.1645	27.7932	15.5306	0.00560975	0	8.13861
203.908	376.709	3000	3	9	20	14.1089	12.5387	14.8877	0.314074	1.97032	26.6171	10.8878	29.7861	18.4009	0.000551712	0	10.7452
228.231	376.254	500	3	9	20	44.0666	53.3908	44.5986	0.163123	1.98231	48.127	25.8194	14.4257	4.59002	0.00273477	0	2.43639
Sample	VPP
Modification	POx
Weight	0.906	g
Volume	1	ml
TOS[h]	Temperature_measured[°C]	GHSV[h-1]	Propane_in[%vol]	Oxygen_in[%vol]	Steam_in[%vol]	Propane_Conversion_direct[%]	Oxygen_Conversion[%]	Propane_Conversion_product_based[%]	Selectivity_Ethane_product_based[%]	Selectivity_Ethene_product_based[%]	Selectivity_CO_product_based[%]	Selectivity_CO2_product_based[%]	Selectivity_Acetic_Acid_product_based[%]	Selectivity_Acrylic_Acid_product_based[%]	Selectivity_Furan_product_based[%]	Selectivity_Acetaldehyde_product_based[%]	Selectivity_Propene_product_based[%]
22.0847	301.608	1000	3	9	20	0.543658	0.394062	3.03557	0.0787414	0.0743329	41.762	4.77232	9.94714	3.81307	0.0630008	0	37.7449
34.4766	351.268	1000	3	9	20	5.90603	4.79327	6.92391	0.523211	0.875572	26.7903	9.34286	18.8891	16.3465	0.012877	0	26.5621
46.8899	401.354	1000	3	9	20	22.6675	25.3247	24.0799	0.818865	1.91214	40.8316	20.3619	13.7318	14.9704	0.00717661	0	6.75955
59.212	426.837	1000	3	9	20	42.3071	52.7809	43.0303	0.991173	2.10988	52.3097	26.7636	6.2999	7.34548	0.00362714	0	3.30964
71.5614	452.391	1000	3	9	20	62.5469	82.7832	62.5107	0.792141	2.01864	59.4557	30.4835	2.34065	2.77671	0.00775929	0	1.62211
84.0513	427.13	1000	3	9	20	50.2624	64.3145	51.4022	0.615454	2.00901	55.2703	27.1069	5.88588	5.36095	0.000765922	0	2.34868
96.5996	401.834	1000	3	9	20	36.4117	43.1105	37.7096	0.436419	2.039	46.6512	22.7152	13.146	9.02813	0.00437793	0	3.75927
109.391	351.473	1000	3	9	20	13.1082	12.1994	15.1784	0.220242	1.84185	29.0226	10.4021	31.5292	14.6114	0.00449757	0	10.7979
122.458	301.65	1000	3	9	20	3.45009	3.18316	4.54184	0.118797	0.926792	28.184	3.50817	30.5003	8.55471	0.0492884	0	27.0929
147.079	376.597	1000	3	9	20	24.9513	25.9042	26.2823	0.289193	2.04275	36.6255	16.5473	23.3387	12.9022	0.00355128	0	5.9599
167.338	376.677	2000	3	9	20	16.1948	15.2982	17.8555	0.321951	1.98212	28.7198	11.6787	27.9168	18.2872	0.00834072	0	9.43123
204.231	376.772	3000	3	9	20	13.4693	11.527	14.7163	0.306116	1.90138	25.863	9.3399	29.2379	20.4859	0.00414885	0	11.5943
228.555	376.579	500	3	9	20	40.4413	48.499	41.6857	0.183653	1.97169	46.1067	24.1776	15.6877	6.00404	0.00203551	0	2.96196
Sample	VPP
Modification	BOx
Weight	0.9018	g
Volume	1	ml
TOS[h]	Temperature_measured[°C]	GHSV[h-1]	Propane_in[%vol]	Oxygen_in[%vol]	Steam_in[%vol]	Propane_Conversion_direct[%]	Oxygen_Conversion[%]	Propane_Conversion_product_based[%]	Selectivity_Ethane_product_based[%]	Selectivity_Ethene_product_based[%]	Selectivity_CO_product_based[%]	Selectivity_CO2_product_based[%]	Selectivity_Acetic_Acid_product_based[%]	Selectivity_Acrylic_Acid_product_based[%]	Selectivity_Furan_product_based[%]	Selectivity_Acetaldehyde_product_based[%]	Selectivity_Propene_product_based[%]
22.4098	301.463	1000	3	9	20	4.34789	3.0219	5.98905	0.463826	0.911571	26.6305	6.57379	34.649	9.1565	0.0098605	0	20.8486
34.8014	351.178	1000	3	9	20	16.3918	16.2148	18.2348	0.228048	1.87478	30.4278	14.1566	31.4253	13.2271	0.00220323	0	7.77018
47.2172	401.406	1000	3	9	20	40.9871	50.302	42.1381	0.385157	2.1553	48.1983	26.1033	12.4448	6.75191	0	0.470992	2.79259
59.5381	426.696	1000	3	9	20	54.6956	71.6288	55.3645	0.476397	2.10186	55.7819	30.2935	5.42135	3.41039	0.00149988	0.527817	1.73678
71.8885	451.94	1000	3	9	20	67.6524	91.4579	68.0087	0.425464	1.95616	61.4578	31.8699	1.76129	1.11754	0.00160692	0.288802	1.09184
84.3771	426.72	1000	3	9	20	54.9374	70.67	55.3782	0.449395	2.00716	55.6555	28.4344	6.16765	4.63043	0	0.224766	1.72523
96.9269	401.384	1000	3	9	20	39.2662	47.0252	40.4955	0.368864	2.05101	46.9349	23.519	13.7746	8.37659	0.00111869	0	2.95128
109.717	351.079	1000	3	9	20	14.931	14.1461	16.3837	0.204403	1.85447	28.6382	11.1006	32.9978	14.2935	0	0	9.10667
122.788	301.468	1000	3	9	20	3.35237	2.60604	5.04238	0.23444	0.931455	30.2846	3.91157	31.7208	8.64711	0.00923314	0	23.3407
147.407	376.115	1000	3	9	20	26.6233	27.2996	27.4034	0.27197	2.05329	35.9997	17.2158	24.1519	12.6285	0.00529652	0	5.31503
167.665	376.265	2000	3	9	20	16.2334	14.8897	17.6797	0.31211	1.95636	27.5776	11.4784	28.9593	18.874	0.00461533	0	9.11812
204.555	376.393	3000	3	9	20	12.9051	10.6715	14.9736	0.286209	1.79388	27.8206	9.12134	28.5927	20.0929	0.00292145	0	10.9256
228.879	376.111	500	3	9	20	42.6043	51.5702	43.8962	0.166631	1.9548	46.4231	24.8225	15.3903	5.63127	0.000722196	0	2.63279
Sample	VPP
Modification	MnOx
Weight	1.1211	g
Volume	1	ml
TOS[h]	Temperature_measured[°C]	GHSV[h-1]	Propane_in[%vol]	Oxygen_in[%vol]	Steam_in[%vol]	Propane_Conversion_direct[%]	Oxygen_Conversion[%]	Propane_Conversion_product_based[%]	Selectivity_Ethane_product_based[%]	Selectivity_Ethene_product_based[%]	Selectivity_CO_product_based[%]	Selectivity_CO2_product_based[%]	Selectivity_Acetic_Acid_product_based[%]	Selectivity_Acrylic_Acid_product_based[%]	Selectivity_Furan_product_based[%]	Selectivity_Acetaldehyde_product_based[%]	Selectivity_Propene_product_based[%]
22.7348	301.305	1000	3	9	20	2.24019	1.92303	3.52937	0	0.101641	29.9994	8.75172	15.4928	2.76739	0.011128	0	41.526
35.1262	351.117	1000	3	9	20	11.1877	12.4307	11.8874	0.249123	0.627532	43.0728	23.3157	12.8095	2.48912	0.00719408	0	17.2244
47.5444	401.015	1000	3	9	20	30.6187	40.1553	31.0353	0.423077	1.03721	54.6573	32.8298	3.70774	1.38841	0.00247108	0.528061	5.18203
59.8644	425.99	1000	3	9	20	42.0007	56.7409	42.3361	0.719208	1.19761	57.6586	34.5139	1.0237	0.65422	0.00324157	0.486606	3.55893
72.2153	450.972	1000	3	9	20	54.9801	75.2798	55.1034	0.959056	1.26746	59.7985	34.7393	0.295429	0.279069	0.00190654	0.211783	2.37818
84.703	425.965	1000	3	9	20	39.5273	51.9668	39.5751	0.844585	1.3791	55.6827	33.1019	2.47411	1.50703	0.000846615	0.61954	4.14004
97.254	400.917	1000	3	9	20	26.4566	31.8933	26.7274	0.547243	1.39534	48.2508	27.9306	9.11236	5.13137	0.00195754	0.495165	6.80951
110.043	351.04	1000	3	9	20	8.55347	8.13349	10.2394	0.315609	1.3318	31.5418	12.9696	26.107	10.3869	0.00117455	0	16.9292
123.119	301.317	1000	3	9	20	1.78009	0.949871	3.20306	0	0.326841	33.8701	3.80534	20.8253	6.30564	0.0578594	0	33.3278
147.736	375.94	1000	3	9	20	18.6327	18.1541	17.6427	0.379757	1.39843	39.0652	20.9404	18.6106	8.55107	0.00474264	0	10.6281
167.993	375.969	2000	3	9	20	10.8453	9.11197	10.6835	0.466899	1.29275	28.6618	13.6093	23.1931	13.9355	0.0180911	0	18.3511
204.878	376.001	3000	3	9	20	8.0785	5.47966	8.05806	0.555882	1.18294	23.842	9.80323	23.481	16.3342	0.0164696	0	24.1941
229.202	375.997	500	3	9	20	30.1006	33.7507	29.0814	0.269538	1.34624	47.6592	27.8894	12.2495	4.25984	0.00492763	0	5.97741
Sample	SmMnO3
Modification	Base
Weight	1.0651	g
Volume	1	ml
TOS[h]	Temperature_measured[°C]	GHSV[h-1]	Propane_in[%vol]	Oxygen_in[%vol]	Steam_in[%vol]	Propane_Conversion_direct[%]	Oxygen_Conversion[%]	Propane_Conversion_product_based[%]	Selectivity_Ethane_product_based[%]	Selectivity_Ethene_product_based[%]	Selectivity_CO_product_based[%]	Selectivity_CO2_product_based[%]	Selectivity_Acetic_Acid_product_based[%]	Selectivity_Acrylic_Acid_product_based[%]	Selectivity_Furan_product_based[%]	Selectivity_Acetaldehyde_product_based[%]	Selectivity_Propene_product_based[%]
14.9344	253.141	1000	3	9	20	17.9273	29.4356	18.0297	0.028194	0.0159725	0.101165	89.308	0.28228	0.136273	0	0	9.8516
27.2644	306.605	1000	3	9	20	58.5166	93.9448	54.8869	0	0.0126386	0.0470529	96.3232	0.237145	0.142729	0	0	3.14706
39.6053	331.855	1000	3	9	20	60.5883	99.1847	58.1253	0	0.026887	0.0459625	96.0463	0.23765	0.19855	0	0	3.36416
54.7594	279.666	1000	3	9	20	34.5544	58.2251	34.4684	0.0107389	0.0222098	0.126472	93.5765	0.237199	0.312765	0	0	5.58302
76.5859	279.605	1000	3	9	20	36.3707	59.5176	35.3324	0.0106362	0.0196372	0.127863	93.6307	0.256306	0.333522	0	0	5.48751
146	279.939	1000	3	9	20	37.1516	60.1616	35.8478	0.0168309	0.00254839	0.112894	93.6872	0.371394	0.402468	0	0	5.29558
159.348	253.249	1000	3	9	20	18.3686	27.4427	17.3169	0.0632359	0	0.160403	87.5688	0.558513	0.538734	0	0	10.9373
173.335	227.537	1000	3	9	20	7.38347	9.35559	6.99517	0.214628	0	0.185111	76.0914	0.824203	0.673873	0	0	21.3128
185.804	253.221	1000	3	9	20	18.2609	27.5066	17.3691	0.0467848	0	0.152762	87.6667	0.467828	0.463653	0	0	11.0229
208.851	253.274	1000	3	9	20	10.2963	14.8295	10.2104	0.0713005	0.192828	0.221784	78.9879	0.635062	0.688704	0	0	18.7343
331.261	253.209	2000	3	9	20	9.87392	15.2155	10.4854	0.044326	0	0.277221	79.8269	0.601855	0.583538	0	0	18.2522
350.495	253.184	3000	3	9	20	7.41017	9.6036	7.29552	0.151569	0	0.248684	73.1168	0.637442	0.783103	0	0	24.3974
396.182	253.118	500	3	9	20	17.8174	27.6931	17.5311	0.0288498	0	0.203028	87.5601	0.468435	0.45418	0	0	11.0615
Sample	SmMnO3
Modification	POx
Weight	1.0506	g
Volume	1	ml
TOS[h]	Temperature_measured[°C]	GHSV[h-1]	Propane_in[%vol]	Oxygen_in[%vol]	Steam_in[%vol]	Propane_Conversion_direct[%]	Oxygen_Conversion[%]	Propane_Conversion_product_based[%]	Selectivity_Ethane_product_based[%]	Selectivity_Ethene_product_based[%]	Selectivity_CO_product_based[%]	Selectivity_CO2_product_based[%]	Selectivity_Acetic_Acid_product_based[%]	Selectivity_Acrylic_Acid_product_based[%]	Selectivity_Furan_product_based[%]	Selectivity_Acetaldehyde_product_based[%]	Selectivity_Propene_product_based[%]
15.2593	252.536	1000	3	9	20	8.2503	11.6519	7.80924	0.173658	0.332838	0.354477	79.5646	0.435114	0.180922	0	0	18.3026
27.5894	304.179	1000	3	9	20	34.4942	57.3414	34.0287	0.0218623	0.0192232	0.168816	93.3591	0.147947	0.101069	0	0	6.03977
39.9303	330.438	1000	3	9	20	52.5588	88.0441	51.3822	0	0.0271041	0.115388	95.6334	0.129076	0.12071	0	0.000842975	3.87266
120.542	330.593	1000	3	9	20	52.6704	87.4467	51.482	0.000824383	0.0235208	0.126141	95.5638	0.145388	0.203236	0	0	3.84948
133.25	304.091	1000	3	9	20	31.9844	52.0693	31.3209	0	0.0198349	0.185032	92.1848	0.251089	0.311528	0	0.000448131	6.90412
146.331	278	1000	3	9	20	16.7431	24.616	15.632	0.0234988	0.0154672	0.272653	86.1589	0.413288	0.459324	0	0	12.3706
159.675	252.52	1000	3	9	20	7.62643	9.71872	6.88064	0.352541	0	0.375879	76.5152	0.784273	0.812748	0	0	20.4715
173.663	227.477	1000	3	9	20	2.61364	2.74745	2.76249	0.527188	0	0.520787	65.4531	1.23789	1.13047	0	0	29.3369
186.129	252.518	1000	3	9	20	6.94719	9.85238	6.98138	0.30016	0.182528	0.400754	76.6335	0.586456	0.680769	0	0	20.5163
209.175	252.465	1000	3	9	20	3.61752	5.04383	3.96232	0.472992	0.418919	0.582737	66.2907	0.829156	1.06839	0	0	28.9857
331.591	252.516	2000	3	9	20	3.71623	5.2867	4.11052	0.456654	0	0.581543	67.346	0.829736	0.892832	0	0	28.6038
350.822	252.469	3000	3	9	20	2.57654	3.56809	3.00962	0.963496	0.375606	0.724166	61.6171	0.856896	1.11644	0	0	32.6206
396.512	252.519	500	3	9	20	7.56999	10.3636	7.25622	0.121704	0	0.412637	77.254	0.57853	0.656789	0	0	20.2623
Sample	SmMnO3
Modification	BOx
Weight	1.0797	g
Volume	1	ml
TOS[h]	Temperature_measured[°C]	GHSV[h-1]	Propane_in[%vol]	Oxygen_in[%vol]	Steam_in[%vol]	Propane_Conversion_direct[%]	Oxygen_Conversion[%]	Propane_Conversion_product_based[%]	Selectivity_Ethane_product_based[%]	Selectivity_Ethene_product_based[%]	Selectivity_CO_product_based[%]	Selectivity_CO2_product_based[%]	Selectivity_Acetic_Acid_product_based[%]	Selectivity_Acrylic_Acid_product_based[%]	Selectivity_Furan_product_based[%]	Selectivity_Acetaldehyde_product_based[%]	Selectivity_Propene_product_based[%]
15.584	252.304	1000	3	9	20	3.709	5.05004	3.87427	0.266556	0.393731	0.823834	70.555	0.659537	0.184571	0	0	25.7907
27.9143	302.686	1000	3	9	20	17.8635	27.9633	17.8266	0.0312331	0.0296814	0.479325	85.8094	0.208045	0.118746	0	0	13.0572
40.2548	328.597	1000	3	9	20	33.4728	53.6567	32.6266	0	0.0411864	0.316042	91.0428	0.123146	0.109723	0	0.000358072	8.2157
120.871	355.634	1000	3	9	20	50.679	83.8396	49.5381	0	0.064821	0.184467	94.25	0.0983793	0.127946	0	0.00122198	5.17441
133.58	329.749	1000	3	9	20	45.1386	74.2517	43.8853	0.000895264	0.0439764	0.11204	93.9293	0.154339	0.192223	0	0	5.46567
146.661	303.599	1000	3	9	20	28.3243	44.3773	26.9346	0.0149568	0.0345974	0.146612	90.6106	0.194298	0.233062	0	0	8.59764
160.003	277.852	1000	3	9	20	14.8017	22.249	14.2392	0.0308612	0.0228411	0.188409	85.527	0.289771	0.325294	0	0	13.2872
173.991	252.562	1000	3	9	20	7.37363	8.9112	6.62565	0.184222	0.157984	0.243707	78.2421	0.402775	0.391253	0	0	19.6739
186.455	252.62	1000	3	9	20	7.48184	9.77694	6.8897	0.0636746	0.265544	0.248854	78.3179	0.435499	0.51895	0	0	19.4888
209.499	252.634	1000	3	9	20	4.05851	5.11109	3.98654	0.209931	0.223102	0.37207	70.0867	0.726869	0.802065	0	0	26.3351
331.92	252.714	2000	3	9	20	4.53516	6.0971	4.6446	0.200274	0.046306	0.328432	71.6352	0.515248	0.606226	0	0	25.6171
351.148	252.749	3000	3	9	20	3.32635	3.69311	3.36666	0.437739	0.7602	0.424466	66.3808	0.701349	0.792334	0	0	29.0428
396.842	252.78	500	3	9	20	9.56941	12.9176	8.89129	0.0459921	0	0.200743	80.5482	0.384555	0.406361	0	0	17.8542
Sample	SmMnO3
Modification	MnOx
Weight	1.097	g
Volume	1	ml
TOS[h]	Temperature_measured[°C]	GHSV[h-1]	Propane_in[%vol]	Oxygen_in[%vol]	Steam_in[%vol]	Propane_Conversion_direct[%]	Oxygen_Conversion[%]	Propane_Conversion_product_based[%]	Selectivity_Ethane_product_based[%]	Selectivity_Ethene_product_based[%]	Selectivity_CO_product_based[%]	Selectivity_CO2_product_based[%]	Selectivity_Acetic_Acid_product_based[%]	Selectivity_Acrylic_Acid_product_based[%]	Selectivity_Furan_product_based[%]	Selectivity_Acetaldehyde_product_based[%]	Selectivity_Propene_product_based[%]
15.9088	252.209	1000	3	9	20	25.509	41.6905	24.742	0.0273687	0	0.127556	92.8545	0.0843418	0	0	0	6.70275
28.2392	302.996	1000	3	9	20	60.2772	98.8599	57.252	0	0	0.0339629	96.8264	0.0650762	0.0429053	0	0	2.92744
40.58	328.033	1000	3	9	20	61.6775	100	58.1821	0	0.0113408	0.0226061	96.5745	0.071138	0.0630502	0	0	3.17693
55.7344	277.498	1000	3	9	20	39.6358	66.1581	38.621	0.00780578	0.0181077	0.057991	94.9268	0.0839479	0.0972609	0	0	4.68085
77.5671	277.492	1000	3	9	20	40.7986	67.9669	39.7721	0.00783542	0.0106995	0.0762903	95.0145	0.0816185	0.10334	0	0	4.57558
121.199	277.674	1000	3	9	20	44.2128	74.1624	43.0832	0	0	0.0537253	95.8654	0.078328	0.111787	0	0	3.77874
133.909	277.635	1000	3	9	20	43.4471	72.7125	42.1945	0	0	0.0560892	95.6201	0.10236	0.137975	0	0	3.97108
146.991	277.621	1000	3	9	20	43.067	72.2826	42.0206	0	0	0.0571522	95.558	0.105771	0.13116	0	0	4.03153
160.33	252.18	1000	3	9	20	22.3453	36.5922	22.0872	0.0513672	0	0.101467	91.3851	0.146457	0.167612	0	0	7.94072
174.318	227.017	1000	3	9	20	8.90528	13.3035	9.20281	0.120992	0	0.18758	82.4676	0.242144	0.225474	0	0	16.256
186.78	252.167	1000	3	9	20	22.7587	36.7466	22.2017	0.0159513	0	0.108003	91.4123	0.119139	0.144191	0	0	7.98072
209.823	252.183	1000	3	9	20	13.2085	20.29	13.134	0.0596497	0	0.186873	84.9218	0.167445	0.208	0	0	14.0603
332.249	252.185	2000	3	9	20	13.1078	21.0671	13.5602	0.0970034	0	0.188082	85.3009	0.214193	0.170882	0	0	13.6532
351.475	252.175	3000	3	9	20	9.62161	14.0768	9.71443	0.121042	0	0.28235	80.19	0.225206	0.229873	0	0	18.4269
397.172	252.136	500	3	9	20	23.3133	37.3857	22.5704	0.0246904	0	0.0928867	91.4453	0.126919	0.141875	0	0	7.94298
Butane_Selective_Oxidation
Sample	MoVTeNbOx
Modification	Base
Weight	1.2535	g
Volume	1	ml
TOS[h]	Temperature_measured[°C]	GHSV[h-1]	Butane_in[%vol]	Oxygen_in[%vol]	Steam_in[%vol]	Butane_Conversion_direct[%]	Oxygen_Conversion[%]	Butane_Conversion_product_based[%]	Selectivity_MAN_product_based[%]	Selectivity_1-Butene_product_based[%]	Selectivity_Ethane_product_based[%]	Selectivity_Ethene_product_based[%]	Selectivity_CO_product_based[%]	Selectivity_CO2_product_based[%]	Selectivity_Acetic_Acid_product_based[%]	Selectivity_Acrylic_Acid_product_based[%]	Selectivity_Furan_product_based[%]	Selectivity_Acetaldehyde_product_based[%]	Selectivity_Propane_product_based[%]	Selectivity_Propene_product_based[%]	Selectivity_2,5_Dihydrofuran_product_based[%]	Selectivity_Acrolein_product_based[%]
105.142	251.567	2000	2	20	3	2.71047	1.0093	2.97421	9.11813	0.215653	0	0	7.96911	9.78506	59.6026	8.48413	0.322041	0.293243	0.091626	0.172226	0.327242	3.61889
117.787	301.221	2000	2	20	3	9.91785	3.5412	9.9853	20.8968	0.182767	0.0259817	0	13.3808	14.3625	39.3157	10.4513	0.0020316	0.123486	0.0477288	0.12674	0.245999	0.838171
130.438	351.08	2000	2	20	3	34.2964	15.2807	36.9757	32.0449	0.106526	0.0315124	0	22.9916	20.4602	11.9769	11.9744	0.000630173	0.0590407	0.0070242	0.053133	0.147857	0.146254
143.086	401.173	2000	2	20	3	74.3618	37.1556	77.1799	32.1638	0.036415	0.0223149	0	32.4684	24.0283	1.85331	9.25242	0.000199248	0.0712763	0.00168212	0.0123811	0.0611482	0.0284042
155.54	401.191	2000	2	20	3	74.3784	36.7427	76.8172	32.043	0.0360375	0.0231296	0	32.4663	24.0761	1.81788	9.35657	0.000361043	0.0692714	0.00242671	0.0141014	0.0641642	0.0306474
168.225	401.159	2000	2	20	3	73.4705	36.1807	76.826	32.499	0.0360656	0.0221698	0	32.3795	23.7622	1.8103	9.31021	0.000224479	0.0650494	0.00315733	0.0147315	0.066827	0.0306358
181.275	351.055	2000	2	20	3	33.375	14.7746	35.5445	31.508	0.113875	0.0237813	0	22.8748	20.5999	11.9546	12.5209	0	0.049115	0.0116675	0.0663666	0.17673	0.100193
194.615	301.19	2000	2	20	3	8.22398	3.10741	8.58893	22.6777	0.212712	0.0230004	0	12.3571	14.2519	37.9816	11.2851	0	0.128405	0.0576213	0.140535	0.320036	0.564374
208.514	251.583	2000	2	20	3	2.17646	0.60881	2.24912	15.4457	0.266846	0	0	6.59896	9.44258	55.8616	8.29835	0	0.356539	0.246957	0.298797	0.443606	2.74012
221.237	326.09	2000	2	20	3	15.5085	6.77293	17.3621	26.3778	0.170148	0.0215406	0	17.8193	17.9705	24.5843	12.4231	0.000697568	0.0741156	0.0283554	0.0982237	0.243498	0.188332
239.644	326.127	4000	2	20	3	11.0262	3.80558	9.91314	25.788	0.299335	0.0488759	0	15.1578	15.737	28.3279	13.3342	0	0.116583	0.0514454	0.134635	0.396791	0.607328
260.109	326.07	1000	2	20	3	29.1052	13.2351	30.7785	27.6756	0.0896023	0.0199169	0	20.3402	20.239	20.3711	10.9059	0	0.049487	0.0156956	0.06766	0.129387	0.0964338
280.588	326.086	500	2	20	3	42.4937	27.856	46.2122	33.031	0.0519549	0.0183518	0	20.0493	17.8511	18.743	10.0807	0	0.0312891	0.00755291	0.0361432	0.0505273	0.049139
Sample	MoVTeNbOx
Modification	POx
Weight	1.1164	g
Volume	1	ml
TOS[h]	Temperature_measured[°C]	GHSV[h-1]	Butane_in[%vol]	Oxygen_in[%vol]	Steam_in[%vol]	Butane_Conversion_direct[%]	Oxygen_Conversion[%]	Butane_Conversion_product_based[%]	Selectivity_MAN_product_based[%]	Selectivity_1-Butene_product_based[%]	Selectivity_Ethane_product_based[%]	Selectivity_Ethene_product_based[%]	Selectivity_CO_product_based[%]	Selectivity_CO2_product_based[%]	Selectivity_Acetic_Acid_product_based[%]	Selectivity_Acrylic_Acid_product_based[%]	Selectivity_Furan_product_based[%]	Selectivity_Acetaldehyde_product_based[%]	Selectivity_Propane_product_based[%]	Selectivity_Propene_product_based[%]	Selectivity_2,5_Dihydrofuran_product_based[%]	Selectivity_Acrolein_product_based[%]
17.4898	252.214	2000	2	20	3	0.437608	0.205986	0.963762	8.42563	0.308193	0	0	8.92642	8.41502	57.8706	14.012	0	1.53063	0.417223	0.0942876	0	0
30.0855	301.628	2000	2	20	3	1.43804	0.414412	3.75248	12.1569	0.182418	0.0704865	0	11.3848	10.5331	51.4146	13.1979	0	0.791579	0.110721	0.157496	0	0
42.6043	351.279	2000	2	20	3	9.78496	4.31555	11.1427	16.1846	0.200753	0.160427	0	18.116	16.855	36.7984	10.7128	0.0117784	0.793284	0.0444329	0.122587	0	0
117.246	376.238	2000	2	20	3	16.3085	6.31981	17.3683	19.9221	0.198038	0.110915	0	25.1747	19.4424	23.5004	10.6927	0.0339534	0.815183	0.0220575	0.0875356	0	0
136.587	402.788	2000	2	20	3	48.4413	22.3654	51.6071	26.6048	0.093844	0.0507731	0	31.7847	21.9944	8.01235	10.8347	0.0171303	0.56463	0.00677023	0.0359209	0	0
155.557	403.483	2000	2	20	3	61.0717	28.532	64.2472	30.1809	0.0633248	0.0421401	0	30.5368	20.1753	6.72884	11.8582	0.0129576	0.376494	0.00431853	0.0206451	0	0
168.108	431.147	2000	2	20	3	95.1974	48.4352	95.7877	29.1153	0.042135	0.037402	0	38.2742	25.6369	1.02832	5.39704	0.0038815	0.45844	0.00032989	0.00603631	0	0
180.581	405.279	2000	2	20	3	85.5755	40.2562	87.6268	35.1097	0.0195966	0.030354	0	30.0102	19.5962	3.39032	11.6242	0.00655532	0.202727	0.00157033	0.008594	0	0
193.115	378.383	2000	2	20	3	54.8661	23.5737	59.479	34.2992	0.0602484	0.0285338	0	22.9924	15.6377	11.6596	15.1374	0.0101	0.146331	0.00588802	0.0226512	0	0
205.9	352.092	2000	2	20	3	25.0577	10.1171	29.8416	30.3197	0.121438	0.0299022	0	17.3745	12.2711	24.644	15.0042	0.012708	0.150034	0.0159613	0.0563468	0	0
219.124	301.716	2000	2	20	3	8.37652	1.7221	6.51901	20.562	0.2253	0.0342614	0	10.4976	7.92397	46.2152	14.0679	0	0.295719	0.0567947	0.121396	0	0
232.934	252.244	2000	2	20	3	1.20784	0.3306	1.52446	11.1178	0.295664	0	0	7.29308	6.70373	59.6932	13.5921	0	0.779369	0.260591	0.264481	0	0
262.235	326.655	2000	2	20	3	12.0006	4.32225	13.8626	25.4944	0.178352	0.0477924	0	13.1368	9.53026	36.9286	14.3881	0	0.194791	0.0263736	0.0745467	0	0
282.677	326.693	4000	2	20	3	7.44946	2.27237	7.21267	24.3699	0.346881	0.034957	0	11.2342	7.76371	39.6467	16.119	0	0.302401	0.0552304	0.126951	0	0
305.094	326.633	1000	2	20	3	23.5305	9.18445	25.9087	26.8664	0.0897083	0.0420895	0	15.6539	11.875	32.7853	12.4822	0	0.142517	0.0150163	0.04784	0	0
343.585	326.648	500	2	20	3	39.651	18.8777	43.145	28.0801	0.0488148	0.0420285	0	18.9845	15.0297	27.4473	10.2073	0	0.120954	0.00725793	0.031998	0	0
Sample	MoVTeNbOx
Modification	BOx
Weight	1.0959	g
Volume	1	ml
TOS[h]	Temperature_measured[°C]	GHSV[h-1]	Butane_in[%vol]	Oxygen_in[%vol]	Steam_in[%vol]	Butane_Conversion_direct[%]	Oxygen_Conversion[%]	Butane_Conversion_product_based[%]	Selectivity_MAN_product_based[%]	Selectivity_1-Butene_product_based[%]	Selectivity_Ethane_product_based[%]	Selectivity_Ethene_product_based[%]	Selectivity_CO_product_based[%]	Selectivity_CO2_product_based[%]	Selectivity_Acetic_Acid_product_based[%]	Selectivity_Acrylic_Acid_product_based[%]	Selectivity_Furan_product_based[%]	Selectivity_Acetaldehyde_product_based[%]	Selectivity_Propane_product_based[%]	Selectivity_Propene_product_based[%]	Selectivity_2,5_Dihydrofuran_product_based[%]	Selectivity_Acrolein_product_based[%]
26.1007	301.883	2000	2	20	3	13.213	2.50595	8.03574	18.7099	0.249095	0.0274454	0	11.2512	13.0342	41.753	11.665	2.78523	0	0.0268784	0.134786	0.359801	0.00345131
38.2931	352.971	2000	2	20	3	31.4862	12.624	32.4823	31.0363	0.141459	0.0212376	0	20.4364	18.5791	14.615	14.4385	0.447576	0	0.0111239	0.06989	0.201734	0.00162805
50.4885	407.695	2000	2	20	3	88.6308	40.9202	89.4606	33.4705	0.0145891	0.0243998	0	31.9232	23.0908	1.37839	10.0422	0	0	0	0.00674814	0.0283743	0.0209251
62.5479	433.758	2000	2	20	3	97.2564	47.5393	97.422	29.8636	0.00354713	0.0268349	0	38.5238	27.0122	0.340316	4.2125	0.00383982	0	0	0.00424938	0.00623736	0.00290726
74.7981	407.684	2000	2	20	3	88.545	40.7554	89.6149	34.226	0.0140971	0.0242714	0	31.2839	22.3864	1.29715	10.7162	7.60492e-05	0	0	0.00679269	0.0308185	0.0142878
87.1522	380.049	2000	2	20	3	59.572	25.754	62.0081	34.8462	0.0603727	0.0200207	0	24.7347	19.6323	5.17499	15.3096	0.0319983	0	0.00216841	0.0190382	0.123213	0.045335
99.85	352.868	2000	2	20	3	29.8131	11.9993	31.464	31.4455	0.146412	0.0373412	0	19.7052	18.0013	14.4134	15.6132	0.291023	0	0.0154718	0.0792686	0.249836	0.00199471
112.833	301.864	2000	2	20	3	6.92205	2.2158	6.59466	20.208	0.310623	0	0	10.0342	12.3171	41.4042	12.8633	2.08044	0	0.0725363	0.193882	0.513562	0.00215596
126.468	276.97	2000	2	20	3	4.75336	0.858462	2.79254	6.03229	0.42353	0	0	8.36511	11.9124	57.4902	12.0572	2.50454	0	0.144551	0.316062	0.750598	0.00356248
154.351	327.398	2000	2	20	3	16.8812	6.65508	18.756	22.0853	0.144019	0.0609543	0	17.0907	16.8781	33.1955	10.158	0.0527879	0	0.0164924	0.092305	0.225457	0.000303247
170.511	327.406	4000	2	20	3	7.62706	3.39494	8.40017	23.1583	0.374265	0.0608851	0	12.4276	13.259	36.1336	13.4995	0.341703	0	0.0361379	0.145718	0.557628	0.0056355
190.662	326.893	1000	2	20	3	30.5849	8.66409	31.084	29.0828	0.0885654	0.0416281	0	17.2055	16.7762	24.7317	11.7644	0	0	0.00325768	0.0509255	0.112596	0.142517
210.841	326.648	500	2	20	3	54.4335	11.4698	57.9992	27.9279	0.030938	0.0178436	0	24.1808	23.0202	15.7409	8.93571	0	0	0	0.0431784	0.0540778	0.0484991
Sample	MoVTeNbOx
Modification	MnOx
Weight	1.1289	g
Volume	1	ml
TOS[h]	Temperature_measured[°C]	GHSV[h-1]	Butane_in[%vol]	Oxygen_in[%vol]	Steam_in[%vol]	Butane_Conversion_direct[%]	Oxygen_Conversion[%]	Butane_Conversion_product_based[%]	Selectivity_MAN_product_based[%]	Selectivity_1-Butene_product_based[%]	Selectivity_Ethane_product_based[%]	Selectivity_Ethene_product_based[%]	Selectivity_CO_product_based[%]	Selectivity_CO2_product_based[%]	Selectivity_Acetic_Acid_product_based[%]	Selectivity_Acrylic_Acid_product_based[%]	Selectivity_Furan_product_based[%]	Selectivity_Acetaldehyde_product_based[%]	Selectivity_Propane_product_based[%]	Selectivity_Propene_product_based[%]	Selectivity_2,5_Dihydrofuran_product_based[%]	Selectivity_Acrolein_product_based[%]
105.472	251.569	2000	2	20	3	1.32567	0	0.357243	0	3.31736	0	0	0	26.5244	22.3823	0	4.85761	2.37606	0.903746	0.709873	1.13111	37.7976
118.117	301.141	2000	2	20	3	1.95552	0.245692	1.31397	1.98233	3.61797	0.167411	0	14.7796	29.8491	39.063	3.45958	1.78773	2.26437	0.360114	0.802986	0.508072	1.35775
130.768	350.832	2000	2	20	3	16.9579	7.08834	15.2307	9.57877	0.490488	0.254939	0	33.953	36.6239	14.0572	3.66038	0.113413	0.281944	0.0489723	0.390535	0.149647	0.3968
143.417	400.856	2000	2	20	3	65.1172	32.8792	67.4024	26.9457	0.0567804	0.0646504	0	36.7345	28.3467	2.42699	5.17816	0	0.122477	0.00397866	0.0285233	0.0391625	0.0523984
155.869	425.848	2000	2	20	3	85.3824	45.9013	86.9599	24.7676	0.0213082	0.0485301	0	41.018	29.7935	0.58636	3.52702	7.10676e-05	0.192532	0	0.00979469	0.0184046	0.0167668
168.556	400.867	2000	2	20	3	69.1298	34.669	72.8652	30.3734	0.0411435	0.0451145	0	34.1386	25.408	2.3596	7.44417	0	0.0902971	0.00277861	0.0164118	0.0480072	0.0324569
181.605	350.859	2000	2	20	3	25.7756	9.05684	24.6985	28.8567	0.179889	0.0782055	0	20.4775	17.8695	19.0416	12.7964	0.000535119	0.0833236	0.0294433	0.15816	0.19644	0.2322
194.945	301.164	2000	2	20	3	10.5447	1.71217	6.05247	21.771	0.337293	0.0675811	0	10.1131	10.5051	43.3368	11.8922	0	0.23211	0.094323	0.366795	0.356194	0.927549
208.844	251.572	2000	2	20	3	4.23425	0.470904	1.56342	14.4483	0.477816	0	0	6.4689	7.36606	58.6861	8.926	0.361111	0.785989	0.341529	0.629747	0.523382	0.985125
221.565	325.975	2000	2	20	3	11.6211	4.11166	11.9555	24.8936	0.267515	0.109917	0	14.3164	13.6167	32.8444	12.9487	0.0436913	0.128694	0.0487922	0.257874	0.270974	0.25274
239.973	325.977	4000	2	20	3	7.26878	1.91382	6.4215	24.3337	0.500781	0.0914906	0	11.3836	10.9067	36.6644	14.3747	0.0827209	0.215191	0.103928	0.360494	0.508768	0.473368
260.44	326	1000	2	20	3	21.5208	8.56571	22.0524	25.9849	0.141763	0.116684	0	17.7963	16.8979	27.6914	10.811	0	0.0817359	0.0251977	0.168412	0.138268	0.146459
280.919	326.012	500	2	20	3	29.6822	19.1534	33.792	29.1538	0.085208	0.0608573	0	18.6437	16.7308	25.5222	9.53979	0	0.0495948	0.0126467	0.0815058	0.0564173	0.0634715
Sample	MoVOx
Modification	Base
Weight	0.9538	g
Volume	1	ml
TOS[h]	Temperature_measured[°C]	GHSV[h-1]	Butane_in[%vol]	Oxygen_in[%vol]	Steam_in[%vol]	Butane_Conversion_direct[%]	Oxygen_Conversion[%]	Butane_Conversion_product_based[%]	Selectivity_MAN_product_based[%]	Selectivity_1-Butene_product_based[%]	Selectivity_Ethane_product_based[%]	Selectivity_Ethene_product_based[%]	Selectivity_CO_product_based[%]	Selectivity_CO2_product_based[%]	Selectivity_Acetic_Acid_product_based[%]	Selectivity_Acrylic_Acid_product_based[%]	Selectivity_Furan_product_based[%]	Selectivity_Acetaldehyde_product_based[%]	Selectivity_Propane_product_based[%]	Selectivity_Propene_product_based[%]	Selectivity_2,5_Dihydrofuran_product_based[%]	Selectivity_Acrolein_product_based[%]
54.5028	227.218	2000	2	20	3	11.9435	4.94653	15.4678	4.28128	0.0342089	0.012773	0	15.2291	11.4212	67.6243	1.16936	0	0.123304	0.0340495	0.0703995	0	0
67.0977	252.511	2000	2	20	3	26.4556	10.3359	31.0629	4.71245	0.0237301	0.0167667	0	18.4627	14.4912	61.2875	0.857878	0	0.0563988	0.0201532	0.0712799	0	0
79.7313	278.294	2000	2	20	3	50.2029	22.0134	55.1636	4.6238	0.0130556	0.0206021	0	23.9995	19.7755	50.9055	0.564937	0	0.0264763	0.0105246	0.0601948	0	0
92.3001	305.046	2000	2	20	3	83.5783	42.5144	85.5083	3.08423	0.00372806	0.0174997	0	36.8858	30.6039	29.1183	0.247957	0	0.0172918	0.00453405	0.0138295	0	0.00302749
104.833	304.685	2000	2	20	3	80.0181	40.6196	83.0537	3.6593	0.0047588	0.0183407	0	35.2564	29.2469	31.4774	0.29033	0.0105997	0.0172096	0.00372273	0.0151529	0	0
117.69	304.693	2000	2	20	3	79.1663	38.9369	82.3342	3.9134	0.0049601	0.0189008	0	34.5606	28.6101	32.5488	0.301694	0.00268673	0.0167507	0.00437909	0.0178294	0	0
130.811	277.943	2000	2	20	3	43.7256	18.0573	48.5855	6.29993	0.0195509	0.0233587	0	21.6105	17.3458	53.834	0.742032	0	0.0345545	0.0120309	0.0781584	0	0
144.211	252.321	2000	2	20	3	20.8498	8.5377	26.0172	6.66006	0.0366078	0.0199821	0	16.8231	12.8166	62.2185	1.21017	0	0.0869287	0.0262259	0.101854	0	0
158.224	227.146	2000	2	20	3	10.0774	3.91519	12.6737	5.08971	0.0538925	0.00855639	0	14.0654	10.3604	68.369	1.6956	0	0.188158	0.0518923	0.117392	0	0
171.161	227.156	2000	2	20	3	11.7254	4.10521	12.5947	5.19402	0.0574049	0.00505301	0	14.0564	10.3117	68.2798	1.71374	0	0.202813	0.0581143	0.120874	0	0
191.592	227.175	4000	2	20	3	7.07067	2.59709	7.29785	6.02716	0.0902683	0	0	12.9692	8.92568	69.0861	2.25273	0	0.422602	0.0749564	0.151292	0	0
214.059	227.065	1000	2	20	3	18.3869	6.96348	20.785	4.83887	0.0368477	0.0140777	0	14.9239	11.8595	66.88	1.22205	0	0.108554	0.0320782	0.0841178	0	0
238.602	226.999	500	2	20	3	23.9367	12.4654	28.1082	3.18174	0.0302164	0.0127034	0	16.0449	14.0345	65.5527	0.993273	0	0.0661605	0.0196336	0.0641892	0	0
Sample	MoVOx
Modification	POx
Weight	0.8753	g
Volume	1	ml
TOS[h]	Temperature_measured[°C]	GHSV[h-1]	Butane_in[%vol]	Oxygen_in[%vol]	Steam_in[%vol]	Butane_Conversion_direct[%]	Oxygen_Conversion[%]	Butane_Conversion_product_based[%]	Selectivity_MAN_product_based[%]	Selectivity_1-Butene_product_based[%]	Selectivity_Ethane_product_based[%]	Selectivity_Ethene_product_based[%]	Selectivity_CO_product_based[%]	Selectivity_CO2_product_based[%]	Selectivity_Acetic_Acid_product_based[%]	Selectivity_Acrylic_Acid_product_based[%]	Selectivity_Furan_product_based[%]	Selectivity_Acetaldehyde_product_based[%]	Selectivity_Propane_product_based[%]	Selectivity_Propene_product_based[%]	Selectivity_2,5_Dihydrofuran_product_based[%]	Selectivity_Acrolein_product_based[%]
54.8356	226.269	2000	2	20	3	3.20392	1.11191	4.64381	6.0419	0.0361348	0	0	13.0586	7.42975	69.7913	2.92936	0	0.403116	0.122258	0.187598	0	0
67.431	251.297	2000	2	20	3	7.01753	2.47614	9.82688	9.38343	0.029309	0.0202134	0	15.681	9.54315	62.1241	2.78977	0	0.189745	0.0722005	0.167051	0	0
80.0625	276.715	2000	2	20	3	17.2839	6.95666	20.2855	11.4096	0.0212657	0.02339	0	20.3647	13.5551	51.8507	2.51134	0	0.091422	0.0386287	0.123046	0	0.0108038
92.6332	303.365	2000	2	20	3	39.3962	17.929	43.7514	12.5404	0.012089	0.0334342	0	29.6911	20.7418	34.9289	1.91818	0.00239689	0.0551925	0.0111084	0.0653206	0	0
105.164	334.654	2000	2	20	3	94.2217	49.6913	94.8912	9.24839	0.000992901	0.0180839	0	48.5203	33.3909	8.35564	0.40241	0.00407505	0.054835	0	0.00442104	0	0
118.022	303.147	2000	2	20	3	36.8888	16.4899	43.3626	13.132	0.0129964	0.0329832	0	26.4763	18.2535	40.131	1.81455	0.00796517	0.0490841	0.0142539	0.0753238	0	0
131.142	276.741	2000	2	20	3	18.051	6.8355	21.7262	12.0946	0.0214926	0.0279777	0	18.2396	12.0073	54.8668	2.49129	0.00486591	0.0775968	0.0396652	0.128798	0	0
144.542	251.354	2000	2	20	3	3.33078	3.07425	10.6283	8.69061	0.028281	0.0222872	0	14.6747	9.07015	64.0212	3.08622	0	0.158175	0.0773366	0.171057	0	0
158.555	226.333	2000	2	20	3	3.97676	1.32912	5.33669	6.65577	0.0327808	0	0	12.5716	7.32023	69.5107	3.24986	0	0.317877	0.128598	0.212594	0	0
171.492	226.413	2000	2	20	3	14.6173	1.46656	5.458	6.59172	0.0327124	0	0	12.6959	7.35199	69.484	3.17327	0	0.332191	0.118975	0.219176	0	0
191.924	226.427	4000	2	20	3	2.59074	0.761152	2.78207	6.41173	0.0576573	0	0	11.9999	6.50193	69.8133	4.02835	0	0.70006	0.196964	0.290161	0	0
214.394	226.367	1000	2	20	3	6.39519	3.03426	9.41641	6.5416	0.0204779	0	0	13.1988	8.27026	69.1073	2.47244	0	0.184071	0.0721609	0.13293	0	0
238.937	226.345	500	2	20	3	12.1496	5.62846	14.5195	7.35832	0.0147698	0.0131737	0	13.9851	9.69872	66.8051	1.87426	0	0.112509	0.0440014	0.0940571	0	0
Sample	MoVOx
Modification	BOx
Weight	0.9253	g
Volume	1	ml
TOS[h]	Temperature_measured[°C]	GHSV[h-1]	Butane_in[%vol]	Oxygen_in[%vol]	Steam_in[%vol]	Butane_Conversion_direct[%]	Oxygen_Conversion[%]	Butane_Conversion_product_based[%]	Selectivity_MAN_product_based[%]	Selectivity_1-Butene_product_based[%]	Selectivity_Ethane_product_based[%]	Selectivity_Ethene_product_based[%]	Selectivity_CO_product_based[%]	Selectivity_CO2_product_based[%]	Selectivity_Acetic_Acid_product_based[%]	Selectivity_Acrylic_Acid_product_based[%]	Selectivity_Furan_product_based[%]	Selectivity_Acetaldehyde_product_based[%]	Selectivity_Propane_product_based[%]	Selectivity_Propene_product_based[%]	Selectivity_2,5_Dihydrofuran_product_based[%]	Selectivity_Acrolein_product_based[%]
54.1705	227.941	2000	2	20	3	10.1428	3.76112	13.0853	4.25079	0.0475129	0	0	15.3559	11.4493	67.3818	1.27315	0	0.128406	0.0343916	0.078696	0	0
66.7647	253.019	2000	2	20	3	22.4342	8.83088	27.621	4.83164	0.0313751	0.0176199	0	18.5144	14.4477	61.0853	0.925274	0	0.0577561	0.0188248	0.0701402	0	0
79.4001	278.463	2000	2	20	3	47.4795	21.0303	53.2777	4.91898	0.0147082	0.0207525	0	24.3083	19.9884	50.0554	0.604748	0.00189313	0.0242127	0.00853212	0.0541055	0	0
91.9673	304.441	2000	2	20	3	85.192	43.816	86.9177	3.08138	0.00346495	0.0170154	0	38.8543	31.8176	25.9532	0.238066	0.0086362	0.0116776	0.00326084	0.0114892	0	0
104.503	331.254	2000	2	20	3	81.8355	39.5608	83.9647	3.82461	0.00458475	0.0184707	0	36.4109	29.8824	29.537	0.283193	0.00671817	0.0128446	0.00462034	0.0146328	0	0
117.358	304.116	2000	2	20	3	79.2259	39.1452	82.3337	4.16813	0.00527173	0.0194677	0	35.3157	29.0471	31.0957	0.311189	0.0033674	0.0127871	0.00461673	0.0166451	0	0
130.48	278.194	2000	2	20	3	41.8189	17.1624	47.0581	6.73026	0.0211885	0.023362	0	21.3989	17.1673	53.7485	0.793415	0	0.0344697	0.0117859	0.0708807	0	0
143.879	252.9	2000	2	20	3	18.0149	7.94742	24.7165	7.04005	0.0386989	0.019906	0	16.6281	12.681	62.078	1.30564	0	0.0906942	0.0249134	0.0929821	0	0
157.893	227.856	2000	2	20	3	8.90615	3.49096	12.143	5.31892	0.0552477	0.00467229	0	14.0628	10.3619	68.0786	1.77906	0	0.203262	0.0348471	0.100581	0	0
170.831	227.977	2000	2	20	3	14.3184	3.51298	12.2912	5.40701	0.0594763	0.00420407	0	14.0685	10.3345	67.9817	1.78137	0	0.214807	0.0389521	0.109437	0	0
191.259	227.996	4000	2	20	3	6.77425	2.10187	6.96241	6.2523	0.0967145	0	0	12.8522	8.8859	68.8928	2.35452	0	0.449595	0.0723577	0.14358	0	0
213.725	227.959	1000	2	20	3	15.6677	6.58323	19.8863	5.21652	0.0386292	0.0135831	0	14.7786	11.8464	66.5983	1.29229	0	0.113504	0.0274515	0.0747302	0	0
238.267	227.95	500	2	20	3	23.7385	11.7975	27.4113	3.78825	0.0318617	0.0128693	0	15.8857	13.9827	65.1003	1.05749	0	0.0682094	0.0172438	0.0554349	0	0
Sample	MoVOx
Modification	MnOx
Weight	1.2238	g
Volume	1	ml
TOS[h]	Temperature_measured[°C]	GHSV[h-1]	Butane_in[%vol]	Oxygen_in[%vol]	Steam_in[%vol]	Butane_Conversion_direct[%]	Oxygen_Conversion[%]	Butane_Conversion_product_based[%]	Selectivity_MAN_product_based[%]	Selectivity_1-Butene_product_based[%]	Selectivity_Ethane_product_based[%]	Selectivity_Ethene_product_based[%]	Selectivity_CO_product_based[%]	Selectivity_CO2_product_based[%]	Selectivity_Acetic_Acid_product_based[%]	Selectivity_Acrylic_Acid_product_based[%]	Selectivity_Furan_product_based[%]	Selectivity_Acetaldehyde_product_based[%]	Selectivity_Propane_product_based[%]	Selectivity_Propene_product_based[%]	Selectivity_2,5_Dihydrofuran_product_based[%]	Selectivity_Acrolein_product_based[%]
53.838	227.901	2000	2	20	3	7.21205	3.39674	8.33174	4.90995	0.0637678	0	0	15.0771	11.3406	66.9006	1.20671	0	0.37852	0.0376904	0.0850253	0	0
66.4314	253.216	2000	2	20	3	14.6269	6.40446	17.0553	6.27545	0.0486615	0.0249523	0	17.4151	13.4492	61.3827	1.09061	0	0.193049	0.0263545	0.0938206	0	0
79.0688	279.35	2000	2	20	3	27.7118	12.3357	31.613	7.07432	0.0349186	0.0335725	0	20.9574	16.9112	53.8562	0.918529	0.00462982	0.10981	0.0161183	0.0832497	0	0
91.6348	307.07	2000	2	20	3	48.1806	22.8231	52.4526	7.28952	0.0211676	0.0369683	0	27.2852	22.6507	41.8268	0.721588	0.00552149	0.0849739	0.0107342	0.0667941	0	0
104.172	306.618	2000	2	20	3	75.2352	39.035	77.8962	5.84308	0.00755983	0.0329176	0	38.9712	31.7016	22.8551	0.461071	0.00190238	0.0990489	0.0050708	0.0215525	0	0
117.026	306.318	2000	2	20	3	42.2104	20.1761	48.5622	9.31923	0.0242331	0.0419014	0	25.3371	20.5647	43.6901	0.849371	0.00672317	0.0822138	0.01093	0.0735212	0	0
130.149	278.812	2000	2	20	3	24.8799	10.4195	27.7133	9.76097	0.0399095	0.0344871	0	19.0936	15.0001	54.5613	1.25761	0	0.132929	0.0203082	0.098727	0	0
143.548	253.03	2000	2	20	3	15.8165	5.70997	14.6771	9.12372	0.0547875	0.0271617	0	15.7755	11.974	60.9273	1.70635	0	0.262695	0.0316101	0.116941	0	0
157.562	227.879	2000	2	20	3	6.55315	3.2208	6.92997	8.07991	0.0749994	0	0	13.258	9.9503	65.7886	2.11845	0	0.517315	0.0744046	0.138016	0	0
170.5	227.927	2000	2	20	3	10.472	3.54383	7.00009	8.63735	0.0799188	0	0	13.2381	9.95453	65.112	2.1916	0	0.547143	0.0880844	0.151334	0	0
190.927	227.959	4000	2	20	3	5.4852	2.65858	3.96309	9.24732	0.127434	0	0	12.1925	8.82883	65.4587	2.72884	0	1.08255	0.133453	0.20038	0	0
213.391	227.848	1000	2	20	3	9.50343	4.91121	11.4198	7.77516	0.055848	0.0105384	0	13.8919	11.2958	64.8029	1.71372	0	0.310337	0.0496852	0.0941321	0	0
237.931	227.838	500	2	20	3	13.3111	7.52509	15.9573	7.23665	0.0501699	0.0192397	0	14.7462	13.198	63.0505	1.41092	0	0.196448	0.0251972	0.0667195	0	0
Sample	MoO3
Modification	Base
Weight	1.3776	g
Volume	1	ml
TOS[h]	Temperature_measured[°C]	GHSV[h-1]	Butane_in[%vol]	Oxygen_in[%vol]	Steam_in[%vol]	Butane_Conversion_direct[%]	Oxygen_Conversion[%]	Butane_Conversion_product_based[%]	Selectivity_MAN_product_based[%]	Selectivity_1-Butene_product_based[%]	Selectivity_Ethane_product_based[%]	Selectivity_Ethene_product_based[%]	Selectivity_CO_product_based[%]	Selectivity_CO2_product_based[%]	Selectivity_Acetic_Acid_product_based[%]	Selectivity_Acrylic_Acid_product_based[%]	Selectivity_Furan_product_based[%]	Selectivity_Acetaldehyde_product_based[%]	Selectivity_Propane_product_based[%]	Selectivity_Propene_product_based[%]	Selectivity_2,5_Dihydrofuran_product_based[%]	Selectivity_Acrolein_product_based[%]
26.7356	300.249	2000	2	20	3	6.42304	0.262067	0.514984	0	0.358391	0	0	24.8809	32.734	17.5057	0	22.5484	0	0.448461	0.684558	0.721527	0.118051
38.9276	349.833	2000	2	20	3	2.93583	0.636487	1.39139	2.3343	0.32008	0	0	30.7597	45.8743	1.65699	0	18.0128	0	0.241076	0.497496	0.285409	0.017824
51.123	399.508	2000	2	20	3	4.25337	1.49501	2.76474	2.09699	0.662925	0.152093	0	39.2123	52.3793	0	0.806124	3.81026	0	0.228252	0.493024	0.148816	0.00988828
63.1835	424.34	2000	2	20	3	5.21734	2.02415	4.1056	1.5777	0.690377	0.368333	0	40.4697	47.2737	0	0.384273	8.58393	0	0.131111	0.413691	0.107179	0
75.437	449.164	2000	2	20	3	7.3887	2.84018	5.54857	1.19443	0.735585	0.352838	0	47.2416	47.9811	0	0.43112	1.39748	0	0.0888707	0.428229	0.0971257	0.0516613
87.7926	424.233	2000	2	20	3	5.31309	1.69857	3.43846	1.53189	0.602135	0.57637	0.0350901	43.2995	46.4748	0.189731	0.575983	5.84179	0	0.185555	0.50105	0.16688	0.0192915
100.487	399.389	2000	2	20	3	0.415007	1.07279	1.96416	1.76473	0.559305	0.194934	0	41.3102	48.677	0.984042	0	5.29244	0	0.29365	0.623369	0.278402	0.0219306
113.471	349.762	2000	2	20	3	1.28887	0.379918	0.83528	2.05659	0.475046	0	0	27.6618	33.4798	9.54839	0	25.1995	0	0.357823	0.709673	0.497325	0.0140124
127.105	300.214	2000	2	20	3	0.289621	0	0.236439	0	0.810303	0	0	15.1434	31.023	21.459	0	28.7977	0	0.997909	0	1.23601	0.532631
154.993	449.081	2000	2	20	3	3.55375	2.64398	4.96205	0.43105	0.668545	0.553994	0	48.3913	47.6544	0.400219	0	1.29196	0	0.0788433	0.410547	0.11794	0.0011829
171.156	449.213	4000	2	20	3	3.60666	1.51424	2.35352	0	1.08179	0.800476	0	47.0822	47.2202	0.297757	0	2.42659	0	0.12888	0.573772	0.325038	0.0632859
191.307	448.899	1000	2	20	3	13.3008	3.54337	8.38722	0.722714	0.499884	0.386746	0	50.5694	46.2411	0.368832	0	0	0	0.0345651	0.255971	0.0547784	0.866051
211.487	448.814	500	2	20	3	15.6301	5.06443	19.5153	0.852171	0.347675	0.309518	0	49.5865	47.9966	0.258793	0.14272	0	0	0.00348411	0.169909	0.0293946	0.303243
Sample	MoO3
Modification	POx
Weight	1.5443	g
Volume	1	ml
TOS[h]	Temperature_measured[°C]	GHSV[h-1]	Butane_in[%vol]	Oxygen_in[%vol]	Steam_in[%vol]	Butane_Conversion_direct[%]	Oxygen_Conversion[%]	Butane_Conversion_product_based[%]	Selectivity_MAN_product_based[%]	Selectivity_1-Butene_product_based[%]	Selectivity_Ethane_product_based[%]	Selectivity_Ethene_product_based[%]	Selectivity_CO_product_based[%]	Selectivity_CO2_product_based[%]	Selectivity_Acetic_Acid_product_based[%]	Selectivity_Acrylic_Acid_product_based[%]	Selectivity_Furan_product_based[%]	Selectivity_Acetaldehyde_product_based[%]	Selectivity_Propane_product_based[%]	Selectivity_Propene_product_based[%]	Selectivity_2,5_Dihydrofuran_product_based[%]	Selectivity_Acrolein_product_based[%]
55.501	301.07	2000	2	20	3	0	0.182287	0.293114	0	0.491629	0	0	19.2179	55.7796	11.3077	0	0	11.01	1.02858	1.16455	0	0
68.097	350.69	2000	2	20	3	0.746975	0.486111	1.05803	0	1.07259	0.577418	0	24.3245	63.4309	5.3628	0	0	3.86765	0.509476	0.854623	0	0
80.7251	400.375	2000	2	20	3	4.44783	2.28916	3.56064	0	1.93042	0.830181	0	31.1761	62.5244	2.11626	0	0	0.702622	0.151276	0.568735	0	0
93.2995	425.212	2000	2	20	3	7.52842	3.59862	6.02835	0.477044	1.92632	0.843988	0	35.7453	58.7832	1.33085	0	0	0.327299	0.0917628	0.47421	0	0
105.825	450.114	2000	2	20	3	8.08607	5.42722	9.6068	0.304707	2.01694	0.621063	0	39.2769	56.2925	0.81854	0	0.0142592	0.178644	0.0706287	0.405797	0	0
118.685	425.184	2000	2	20	3	4.73555	2.89964	5.09273	0.580532	1.73351	0.796641	0	36.7218	57.4291	1.66436	0	0	0.380106	0.145512	0.54845	0	0
131.804	400.35	2000	2	20	3	4.54086	1.61809	2.58648	0.24145	1.16728	1.3424	0	33.8755	58.1332	3.15909	0	0	1.18564	0.207211	0.68828	0	0
145.205	350.67	2000	2	20	3	2.49954	0.514235	0.637891	0	0.550889	0.61821	0	27.6429	44.4836	17.294	0	0	7.65166	0.671671	1.087	0	0
159.217	301.057	2000	2	20	3	1.20742	0.303122	0.201837	0	0.415692	0	0	16.0816	24.5845	43.7695	0	0	13.1712	1.97745	0	0	0
172.154	450.02	2000	2	20	3	11.9506	5.08844	8.61469	0	1.85354	0.675164	0	41.4163	54.862	0.533151	0	0	0.192731	0.0571253	0.409896	0	0
192.59	450.019	4000	2	20	3	10.0496	2.70131	4.3404	0	1.85836	0.757392	0	39.9889	55.4058	0.657418	0	0	0.576914	0.120567	0.63465	0	0
215.064	449.947	1000	2	20	3	17.5397	8.61276	14.6602	0	1.50296	0.596745	0	43.0892	53.9005	0.500265	0	0	0.09872	0.0368123	0.27486	0	0
239.607	449.935	500	2	20	3	25.4262	18.3431	23.9122	0.0760753	1.06133	0.533762	0	39.1652	58.3793	0.514987	0	0.0039849	0.0598647	0.0137893	0.191704	0	0
Sample	MoO3
Modification	BOx
Weight	1.3779	g
Volume	1	ml
TOS[h]	Temperature_measured[°C]	GHSV[h-1]	Butane_in[%vol]	Oxygen_in[%vol]	Steam_in[%vol]	Butane_Conversion_direct[%]	Oxygen_Conversion[%]	Butane_Conversion_product_based[%]	Selectivity_MAN_product_based[%]	Selectivity_1-Butene_product_based[%]	Selectivity_Ethane_product_based[%]	Selectivity_Ethene_product_based[%]	Selectivity_CO_product_based[%]	Selectivity_CO2_product_based[%]	Selectivity_Acetic_Acid_product_based[%]	Selectivity_Acrylic_Acid_product_based[%]	Selectivity_Furan_product_based[%]	Selectivity_Acetaldehyde_product_based[%]	Selectivity_Propane_product_based[%]	Selectivity_Propene_product_based[%]	Selectivity_2,5_Dihydrofuran_product_based[%]	Selectivity_Acrolein_product_based[%]
26.4179	301.083	2000	2	20	3	5.94122	0.372979	0.690528	1.12193	0.372737	0	0	21.6527	40.4571	6.24937	0	28.0315	0	0.651244	0.87166	0.560077	0.0317046
38.6103	350.712	2000	2	20	3	3.5741	1.04363	1.73889	3.08094	0.777824	0.129888	0	29.9472	55.6785	1.95027	1.31882	5.75938	0	0.42058	0.70689	0.217098	0.0125727
50.8058	400.416	2000	2	20	3	4.17663	2.20854	4.16544	3.40553	1.47577	0.351701	0	33.7256	51.1448	0	1.37749	7.83604	0	0.13039	0.449659	0.101403	0.00159774
62.8656	425.29	2000	2	20	3	6.31253	3.07387	5.52727	2.77616	1.84636	0.290721	0	38.5747	52.2023	0	0.68888	2.98953	0	0.083588	0.460641	0.0839159	0.00317831
75.1177	450.19	2000	2	20	3	7.90419	4.19403	7.77741	2.06493	1.94252	0.522869	0	42.6401	50.3987	0	0.808037	0.96598	0	0.101654	0.480444	0.0640009	0.0107489
87.4725	425.217	2000	2	20	3	5.23084	2.42177	4.39656	2.70332	1.33655	0.347969	0	40.7579	49.3858	0.660837	1.18209	2.74489	0	0.170675	0.569305	0.140698	0
100.169	400.356	2000	2	20	3	2.07411	1.50532	2.48536	2.77724	0.950508	0.5537	0	39.011	49.7554	1.1968	1.0496	3.47006	0	0.303531	0.701882	0.217201	0.0130626
113.152	350.717	2000	2	20	3	1.30282	0.675369	0.788855	3.08373	0.619031	0	0	31.3705	47.746	4.49071	0	10.6187	0	0.554363	0.971223	0.545758	0
126.786	301.079	2000	2	20	3	1.71482	0.162785	0.282982	0	0.767713	0	0	21.8258	28.4376	22.7347	0	23.8912	0	0.818226	0	1.23015	0.294534
154.672	450.072	2000	2	20	3	4.16793	3.6089	6.32765	0.577566	1.34465	0.627664	0	45.0049	49.4338	0.548492	0	1.04304	0	0.101293	0.458627	0.0811589	0.778816
170.834	450.145	4000	2	20	3	2.64353	2.04468	2.92423	0.197691	1.41673	0.528331	0	44.0714	49.0776	0.737763	0	2.92741	0	0.149635	0.641394	0.249807	0.00221639
190.985	449.941	1000	2	20	3	13.6161	4.57747	10.2377	1.11522	1.14423	0.297108	0	47.5229	48.0793	0.646689	0.283459	0.0680876	0	0.0430616	0.296408	0.0450824	0.458431
211.164	449.861	500	2	20	3	23.2756	6.02843	23.223	1.79236	0.933161	0.356336	0	42.6551	52.9393	0.577696	0.32947	0	0	0	0.204099	0.0310268	0.181504
Sample	MoO3
Modification	MnOx
Weight	1.4264	g
Volume	1	ml
TOS[h]	Temperature_measured[°C]	GHSV[h-1]	Butane_in[%vol]	Oxygen_in[%vol]	Steam_in[%vol]	Butane_Conversion_direct[%]	Oxygen_Conversion[%]	Butane_Conversion_product_based[%]	Selectivity_MAN_product_based[%]	Selectivity_1-Butene_product_based[%]	Selectivity_Ethane_product_based[%]	Selectivity_Ethene_product_based[%]	Selectivity_CO_product_based[%]	Selectivity_CO2_product_based[%]	Selectivity_Acetic_Acid_product_based[%]	Selectivity_Acrylic_Acid_product_based[%]	Selectivity_Furan_product_based[%]	Selectivity_Acetaldehyde_product_based[%]	Selectivity_Propane_product_based[%]	Selectivity_Propene_product_based[%]	Selectivity_2,5_Dihydrofuran_product_based[%]	Selectivity_Acrolein_product_based[%]
17.1577	301.424	2000	2	20	3	0.802597	1.35112	0.551363	0	0.527915	0	0	20.4503	59.3016	8.48046	0	0	10.6836	0.447218	0.108921	0	0
29.7565	351.021	2000	2	20	3	1.49106	1.47651	2.00405	1.45753	0.721177	0.201116	0	26.612	67.2214	0.495792	0	0	2.74267	0.207265	0.341074	0	0
42.2753	400.762	2000	2	20	3	8.24677	4.39913	6.02789	1.42085	1.60839	0.690291	0	30.3024	64.816	0.376129	0	0	0.36424	0.0795687	0.342156	0	0
116.915	425.603	2000	2	20	3	7.32989	4.83897	7.71101	1.90141	1.57984	0.349796	0	34.6573	60.6009	0.18623	0	0	0.318147	0.0561179	0.350214	0	0
180.253	450.423	2000	2	20	3	12.3431	6.34644	9.99959	2.5192	1.68151	0.594764	0	37.2165	57.1175	0	0.154696	0.00798567	0.229593	0.0630545	0.415201	0	0
192.788	425.437	2000	2	20	3	6.13771	3.83	5.45393	3.08602	1.25746	0.676707	0	36.4179	56.6072	0.470951	0	0	0.897374	0.116406	0.469971	0	0
205.573	400.559	2000	2	20	3	2.34003	2.22968	2.90882	3.8369	0.863705	0.763462	0	35.4993	54.0667	0.41357	0	0	3.83552	0.188964	0.53188	0	0
218.795	350.953	2000	2	20	3	1.21415	0.981539	1.05901	11.1202	0.953447	0.192829	0	25.7857	38.918	9.56768	4.78507	0	7.54255	0.51559	0.618926	0	0
232.605	301.401	2000	2	20	3	2.34505	1.03718	0.27037	9.93208	1.66853	0	0	16.2699	35.2191	19.5299	0	0	14.5254	2.73002	0.125143	0	0
261.902	450.402	2000	2	20	3	10.0951	6.16913	9.37821	0.56169	1.41886	0.558291	0	38.5934	57.9812	0.164495	0	0	0.273453	0.0496602	0.399006	0	0
282.343	450.444	4000	2	20	3	5.16953	3.54818	4.58055	0.5609	1.43783	0.644097	0	38.4998	56.784	0.130418	0	0	1.31737	0.0825758	0.543019	0	0
304.761	450.3	1000	2	20	3	18.1328	10.0196	15.785	0.848161	1.21231	0.377765	0	39.3689	57.5837	0.172635	0	0	0.117289	0.029096	0.290152	0	0
343.254	450.272	500	2	20	3	27.7499	17.6622	25.7164	1.36213	1.08915	0.332554	0	39.5871	57.0708	0.210206	0.0536643	0	0.0667633	0.0191464	0.208569	0	0
Sample	V2O5
Modification	Base
Weight	0.9785	g
Volume	1	ml
TOS[h]	Temperature_measured[°C]	GHSV[h-1]	Butane_in[%vol]	Oxygen_in[%vol]	Steam_in[%vol]	Butane_Conversion_direct[%]	Oxygen_Conversion[%]	Butane_Conversion_product_based[%]	Selectivity_MAN_product_based[%]	Selectivity_1-Butene_product_based[%]	Selectivity_Ethane_product_based[%]	Selectivity_Ethene_product_based[%]	Selectivity_CO_product_based[%]	Selectivity_CO2_product_based[%]	Selectivity_Acetic_Acid_product_based[%]	Selectivity_Acrylic_Acid_product_based[%]	Selectivity_Furan_product_based[%]	Selectivity_Acetaldehyde_product_based[%]	Selectivity_Propane_product_based[%]	Selectivity_Propene_product_based[%]	Selectivity_2,5_Dihydrofuran_product_based[%]	Selectivity_Acrolein_product_based[%]
103.49	301.898	2000	2	20	3	11.2753	6.16295	11.6271	2.26639	0.0217172	0.02251	0	55.4531	26.2643	13.498	0.17283	0.00398143	0.406827	0.0247394	0.0645532	0.0409553	1.76011
116.138	352.023	2000	2	20	3	23.6504	13.6717	24.8142	2.18517	0.0194687	0.0299825	0	62.8352	29.3562	4.45475	0.352673	0.00121096	0.405761	0.0167226	0.0571539	0.0301816	0.255542
128.79	402.599	2000	2	20	3	45.8682	26.4772	47.5865	0.183516	0.0455659	0.0436122	0	66.3358	32.9861	0.0849882	0.0349273	0	0.163464	0.00855181	0.0312395	0.00138544	0.0808827
141.434	428.042	2000	2	20	3	59.9956	34.2414	61.5797	0.329154	0.0603604	0.0462195	0	67.3074	31.9748	0.105789	0.0563204	0	0.0358435	0.00781273	0.0321917	0	0.0441204
153.889	453.292	2000	2	20	3	71.6363	40.5865	72.9428	0.305494	0.0674621	0.0550643	0	67.3688	32.04	0.0389881	0.0515045	0	0.0117786	0.00509017	0.0277471	0	0.0280002
166.568	427.45	2000	2	20	3	47.9447	28.5439	51.315	0.421144	0.0830767	0.0571718	0	66.7421	32.244	0.0718956	0.0662087	0	0.213535	0.00741743	0.0382423	0.00150504	0.0537484
179.627	401.783	2000	2	20	3	31.0706	17.2764	32.1286	2.11389	0.0805079	0.0492477	0	65.2345	29.6517	1.16673	0.827235	0	0.618494	0.0151753	0.0777205	0.0278759	0.136946
192.96	351.357	2000	2	20	3	11.6944	5.7439	11.0685	6.72962	0.0820432	0.0367755	0	57.0274	25.0212	8.73647	0.657719	0	0.552768	0.0526342	0.100787	0.0578083	0.94481
206.864	301.553	2000	2	20	3	3.73484	1.93877	3.62042	6.5396	0.0850905	0	0	45.6693	19.2764	24.9359	0.403728	0.107539	0.930019	0.120939	0.158462	0.106063	1.66696
219.59	376.409	2000	2	20	3	19.022	9.89755	18.6108	4.99909	0.0797606	0.0451338	0	61.8508	27.2736	3.84034	0.822187	0	0.562282	0.0304438	0.0781905	0.0411746	0.376936
237.995	376.496	4000	2	20	3	11.735	5.53031	10.4346	8.55169	0.141692	0.0465808	0	57.4336	24.2238	6.74934	0.804476	0.00118338	0.710993	0.0379633	0.104659	0.0718616	1.12215
258.45	376.297	1000	2	20	3	29.0127	17.4199	30.1748	2.04385	0.0799617	0.0483438	0	63.9701	29.916	2.40592	0.834639	0.000301662	0.511463	0.0150181	0.0615343	0.0283726	0.0845028
278.935	376.289	500	2	20	3	45.6	32.6952	41.0405	0.6595	0.0333845	0.0345998	0	67.6787	28.722	1.87662	0.479907	0	0.421787	0.00710433	0.0425568	0.00271503	0.0412103
Sample	V2O5
Modification	POx
Weight	1.074	g
Volume	1	ml
TOS[h]	Temperature_measured[°C]	GHSV[h-1]	Butane_in[%vol]	Oxygen_in[%vol]	Steam_in[%vol]	Butane_Conversion_direct[%]	Oxygen_Conversion[%]	Butane_Conversion_product_based[%]	Selectivity_MAN_product_based[%]	Selectivity_1-Butene_product_based[%]	Selectivity_Ethane_product_based[%]	Selectivity_Ethene_product_based[%]	Selectivity_CO_product_based[%]	Selectivity_CO2_product_based[%]	Selectivity_Acetic_Acid_product_based[%]	Selectivity_Acrylic_Acid_product_based[%]	Selectivity_Furan_product_based[%]	Selectivity_Acetaldehyde_product_based[%]	Selectivity_Propane_product_based[%]	Selectivity_Propene_product_based[%]	Selectivity_2,5_Dihydrofuran_product_based[%]	Selectivity_Acrolein_product_based[%]
18.3133	301.271	2000	2	20	3	3.665	2.17152	4.62858	11.1846	0.257676	0.0812213	0	30.5021	14.3442	38.7414	2.28816	0	2.30694	0.0752681	0.21838	0	0
31.2527	351.128	2000	2	20	3	12.1402	5.89742	13.2524	9.01696	0.195981	0.196692	0	42.7457	26.0093	18.2244	1.92911	0.0166823	1.43625	0.0315682	0.197392	0	0
44.009	401.661	2000	2	20	3	36.8341	18.9265	35.8286	5.6271	0.136868	0.204444	0	51.7818	35.7356	3.28113	1.706	0.00441076	1.38484	0.0115272	0.126268	0	0
72.2109	427.35	2000	2	20	3	58.7917	31.6613	59.1954	3.72486	0.197261	0.16671	0	56.0126	35.5007	1.0977	1.73936	0.00473677	1.46989	0.00453647	0.0815675	0	0
84.9502	452.9	2000	2	20	3	74.4839	42.001	75.4123	0.0370323	0.151792	0.16773	0	57.4997	40.3562	0.127328	0.137251	0.00381582	1.43979	0.00389437	0.075449	0	0
98.1069	427.009	2000	2	20	3	55.0358	29.3369	56.0512	5.12511	0.216845	0.139913	0	56.3289	33.7716	1.19802	1.69691	0.00644725	1.41005	0.00658532	0.0996073	0	0
111.337	401.661	2000	2	20	3	38.5265	19.8571	39.4685	10.0297	0.177458	0.12151	0	52.7235	30.3045	3.9274	1.58095	0	0.998924	0.00996049	0.125983	0	0
125.094	351.17	2000	2	20	3	15.7158	8.23336	18.6657	14.7784	0.245809	0.0671192	0	39.7849	21.456	21.5003	1.13238	0	0.852395	0.021285	0.161432	0	0
139.186	301.296	2000	2	20	3	8.02466	3.27043	7.90624	14.2561	0.350651	0.0299429	0	27.5261	11.8921	42.981	1.10733	0	1.63845	0.0457898	0.172532	0	0
152.613	376.341	2000	2	20	3	27.4825	12.9051	27.0536	13.1947	0.212214	0.113937	0	47.2486	26.5084	10.4361	1.30418	0	0.824108	0.0145388	0.143303	0	0
173.492	376.395	4000	2	20	3	14.4095	7.07273	14.8102	14.8092	0.438416	0.0949958	0	43.7093	21.4672	16.5207	1.57978	0	1.14123	0.0229154	0.216173	0	0
196.16	376.26	1000	2	20	3	42.9999	22.5032	43.9856	10.0526	0.0940957	0.0916192	0	50.7649	30.2183	6.56078	1.38716	0	0.741523	0.00784391	0.0811765	0	0
222.626	376.131	500	2	20	3	63.256	37.3461	63.9476	5.05774	0.0515325	0.0680395	0	54.9772	33.6861	3.86444	1.45927	0.00325305	0.783495	0.0033808	0.0454694	0	0
Sample	V2O5
Modification	BOx
Weight	0.966	g
Volume	1	ml
TOS[h]	Temperature_measured[°C]	GHSV[h-1]	Butane_in[%vol]	Oxygen_in[%vol]	Steam_in[%vol]	Butane_Conversion_direct[%]	Oxygen_Conversion[%]	Butane_Conversion_product_based[%]	Selectivity_MAN_product_based[%]	Selectivity_1-Butene_product_based[%]	Selectivity_Ethane_product_based[%]	Selectivity_Ethene_product_based[%]	Selectivity_CO_product_based[%]	Selectivity_CO2_product_based[%]	Selectivity_Acetic_Acid_product_based[%]	Selectivity_Acrylic_Acid_product_based[%]	Selectivity_Furan_product_based[%]	Selectivity_Acetaldehyde_product_based[%]	Selectivity_Propane_product_based[%]	Selectivity_Propene_product_based[%]	Selectivity_2,5_Dihydrofuran_product_based[%]	Selectivity_Acrolein_product_based[%]
103.821	301.834	2000	2	20	3	6.55166	3.20938	7.06369	2.41324	0.0655167	0.00842182	0	52.4625	24.7736	16.6675	0	0.00661107	0.76094	0.0504402	0.102191	0.0582104	2.63078
116.468	351.723	2000	2	20	3	13.2496	7.29046	14.5981	2.45724	0.0568503	0.0319711	0	60.8813	27.9478	6.41345	0.326851	0.000812609	0.588322	0.0316366	0.0833038	0.0404162	1.13999
129.12	402.236	2000	2	20	3	29.5555	16.7945	31.3982	0.0938862	0.0738476	0.0435305	0	66.7444	32.4519	0.0838599	0	0.0461299	0.269533	0.0127493	0.0638566	0.021907	0.0943704
141.764	427.843	2000	2	20	3	42.4309	23.6738	43.9851	0.18576	0.0997848	0.0539925	0	67.3639	31.9441	0.111584	0.0395778	0.000170638	0.0356276	0.00680351	0.0369636	0	0.121723
154.22	453.251	2000	2	20	3	52.8898	29.6682	54.6768	0.156301	0.127787	0.0594886	0	67.7119	31.7672	0.0335211	0.0349285	0	0.0104434	0.0060325	0.0382151	0	0.0541639
166.899	427.437	2000	2	20	3	35.318	20.9146	38.5801	0.232408	0.125571	0.0576042	0	67.3712	31.8313	0.0604999	0.0471824	0.00950125	0.114901	0.0114059	0.049808	0.00126286	0.0873549
179.957	401.754	2000	2	20	3	23.2048	13.2146	24.7438	1.61323	0.11756	0.0669274	0	66.0034	29.1689	1.40308	0.630499	0	0.758879	0.0157551	0.0772319	0.0323732	0.112144
193.291	351.21	2000	2	20	3	8.22522	4.3005	8.64987	6.23662	0.104458	0.0359532	0	56.8558	24.4357	9.268	0.521416	0	0.669356	0.045319	0.110639	0.0648524	1.65187
207.194	301.487	2000	2	20	3	4.16156	1.24176	2.99236	6.2752	0.109844	0	0	45.4228	18.9992	24.1732	0	0.004056	1.13725	0.171927	0.228177	0.12861	3.34983
219.919	376.388	2000	2	20	3	12.7898	7.28983	14.2614	4.37374	0.104687	0.0433629	0	62.125	26.971	4.4156	0.664299	0.00253351	0.686005	0.0360284	0.0969315	0.0510801	0.429749
238.325	376.503	4000	2	20	3	8.02548	3.86707	7.93597	7.03718	0.199249	0.0475652	0	57.5006	24.5643	7.33637	0.652124	0.0643791	0.90994	0.0599567	0.129697	0.0863946	1.41224
258.781	376.246	1000	2	20	3	24.4467	13.5639	24.5044	1.86753	0.0574252	0.0386271	0	64.6795	29.1205	2.73628	0.64913	0	0.598587	0.0163931	0.066306	0.0298015	0.139878
279.266	376.26	500	2	20	3	33.6969	27.8182	33.4567	0.376213	0.0805812	0.0367239	0	67.3473	28.8303	2.29801	0.432624	0	0.474788	0.011011	0.0429936	0.00404542	0.0653833
Sample	V2O5
Modification	MnOx
Weight	1.0534	g
Volume	1	ml
TOS[h]	Temperature_measured[°C]	GHSV[h-1]	Butane_in[%vol]	Oxygen_in[%vol]	Steam_in[%vol]	Butane_Conversion_direct[%]	Oxygen_Conversion[%]	Butane_Conversion_product_based[%]	Selectivity_MAN_product_based[%]	Selectivity_1-Butene_product_based[%]	Selectivity_Ethane_product_based[%]	Selectivity_Ethene_product_based[%]	Selectivity_CO_product_based[%]	Selectivity_CO2_product_based[%]	Selectivity_Acetic_Acid_product_based[%]	Selectivity_Acrylic_Acid_product_based[%]	Selectivity_Furan_product_based[%]	Selectivity_Acetaldehyde_product_based[%]	Selectivity_Propane_product_based[%]	Selectivity_Propene_product_based[%]	Selectivity_2,5_Dihydrofuran_product_based[%]	Selectivity_Acrolein_product_based[%]
104.151	301.507	2000	2	20	3	8.21406	4.46307	8.9845	2.56826	0.0631609	0.025449	0	53.3791	27.4435	13.3576	0.185874	0.0039452	0.478695	0.0470388	0.102948	0.052228	2.29215
116.797	351.699	2000	2	20	3	19.7297	10.6355	20.2571	2.61644	0.0505246	0.0381529	0	59.5908	31.6858	4.69162	0.296429	0.0023683	0.431588	0.019403	0.0721801	0.0331438	0.471528
129.45	402.604	2000	2	20	3	44.8384	24.0128	44.821	0.0430628	0.0585925	0.0536	0	64.4532	35.0294	0.0564986	0	0	0.158266	0.00729627	0.0323204	0.00105183	0.106655
142.095	428.292	2000	2	20	3	58.5212	33.5192	60.3164	0.0901112	0.0758412	0.0567896	0	65.7368	33.8418	0.0754261	0.0241291	0.000158365	0.0122256	0.0040342	0.0264493	0	0.0562872
154.55	453.872	2000	2	20	3	73.0916	40.2787	73.9215	0.0916764	0.0835246	0.0683938	0	66.1678	33.4816	0.00765283	0.022158	0	0.00434022	0.00434427	0.0260184	0	0.042514
167.231	427.765	2000	2	20	3	49.9735	29.1741	52.9775	0.138286	0.0841623	0.0609133	0	66.7236	32.698	0.0184033	0.0285371	0	0.144398	0.00665385	0.0364762	0.000935644	0.0596805
180.287	401.982	2000	2	20	3	32.9998	18.3778	34.5912	1.62942	0.0823731	0.0595543	0	65.7672	30.0063	0.980249	0.644953	0	0.658972	0.011568	0.0696544	0.0240191	0.0658119
193.622	351.231	2000	2	20	3	12.6314	6.53383	12.6636	5.89509	0.100989	0.0406479	0	58.1082	26.6154	7.03912	0.458369	0	0.524776	0.03912	0.104066	0.0467662	1.02746
207.524	301.254	2000	2	20	3	5.78093	2.04519	4.40292	6.48412	0.118627	0	0	48.8397	21.7879	20.7133	0.343641	0.111802	0.784611	0.126737	0.169583	0.0955622	0.424413
220.248	376.44	2000	2	20	3	19.4693	10.6484	20.457	4.28877	0.0931242	0.0475466	0	62.774	28.0808	3.13979	0.581059	0	0.55013	0.023743	0.0816295	0.0361652	0.303202
238.655	376.544	4000	2	20	3	12.1393	5.5737	11.2509	7.88334	0.175713	0.0516471	0	58.1086	24.9979	5.80862	0.568999	0	0.707667	0.040592	0.121631	0.0666691	1.4686
259.113	376.33	1000	2	20	3	32.2235	18.9049	33.3255	1.26299	0.0470936	0.0428945	0	64.8586	30.7194	1.86705	0.53531	0	0.516311	0.0104342	0.0528162	0.0243688	0.0627059
279.596	376.273	500	2	20	3	47.108	36.4965	43.8808	0.172752	0.039946	0.0332871	0	66.9082	32.4942	0.152752	0.0411214	0	0.0886178	0.00711517	0.0222037	0	0.039778
Sample	VPP
Modification	Base
Weight	0.9453	g
Volume	1	ml
TOS[h]	Temperature_measured[°C]	GHSV[h-1]	Butane_in[%vol]	Oxygen_in[%vol]	Steam_in[%vol]	Butane_Conversion_direct[%]	Oxygen_Conversion[%]	Butane_Conversion_product_based[%]	Selectivity_MAN_product_based[%]	Selectivity_1-Butene_product_based[%]	Selectivity_Ethane_product_based[%]	Selectivity_Ethene_product_based[%]	Selectivity_CO_product_based[%]	Selectivity_CO2_product_based[%]	Selectivity_Acetic_Acid_product_based[%]	Selectivity_Acrylic_Acid_product_based[%]	Selectivity_Furan_product_based[%]	Selectivity_Acetaldehyde_product_based[%]	Selectivity_Propane_product_based[%]	Selectivity_Propene_product_based[%]	Selectivity_2,5_Dihydrofuran_product_based[%]	Selectivity_Acrolein_product_based[%]
104.481	250.871	2000	2	20	3	1.19078	0.380662	1.30641	65.035	0.0127862	0	0	6.56217	9.6081	10.8452	1.89153	0.983876	0.777034	0.247106	0.261717	0.207214	3.56821
117.128	300.823	2000	2	20	3	7.28109	2.94979	9.02587	78.697	0.0119109	0.0937803	0	5.29022	6.23252	6.1197	2.04887	0.00858818	0.208039	0.0530854	0.104706	0.034025	1.09755
129.779	351.439	2000	2	20	3	31.1489	13.111	36.8443	79.7138	0.00504589	0.122782	0	7.50182	6.96705	3.50607	1.89168	0	0.113509	0.00737943	0.0348016	0.00925409	0.126858
142.425	403.183	2000	2	20	3	77.25	34.2293	81.5382	72.8096	0.00271398	0.0956666	0	13.0323	11.2028	1.25465	1.41213	0	0.159877	0.0023214	0.00727978	0.00439921	0.016252
154.88	403.179	2000	2	20	3	75.8771	33.599	80.5559	73.3503	0.00235818	0.0941136	0	12.841	10.9182	1.28722	1.33025	0	0.134014	0.00239892	0.00711451	0.00464985	0.028276
167.562	403.202	2000	2	20	3	76.1858	33.634	81.0395	73.19	0.00217716	0.0926411	0	12.9686	11.0739	1.28639	1.24146	0	0.119196	0.00205928	0.00678805	0.00455809	0.012148
180.616	351.38	2000	2	20	3	30.4019	11.9588	33.988	78.6726	0.00426859	0.109953	0	7.77632	7.17318	4.10671	1.92057	0	0.0758378	0.0100869	0.0429537	0.0102456	0.0973153
193.953	300.789	2000	2	20	3	7.30916	2.96221	7.50681	77.3807	0.0103274	0.0858814	0	5.73946	6.71686	7.18804	2.07845	0.000900812	0.159254	0.0686483	0.128128	0.0412724	0.402072
207.854	250.86	2000	2	20	3	1.85329	0.461369	1.05605	64.181	0	0	0	6.89501	9.3765	11.5881	1.69723	0	0.729029	0.217846	0.282375	0.243889	4.78905
220.578	325.964	2000	2	20	3	14.6495	6.26026	17.067	78.7431	0.00675776	0.142573	0	6.41516	6.54943	5.66511	2.08908	0.0292123	0.0961708	0.0278755	0.073262	0.017647	0.144609
238.984	326.051	4000	2	20	3	9.50211	3.24244	9.05922	78.0354	0.0123673	0.12027	0.0132282	5.92559	6.20673	6.20587	2.79072	0.0628077	0.150039	0.0543811	0.117535	0.0345297	0.270531
259.445	325.877	1000	2	20	3	24.0715	11.6262	29.4342	78.6302	0.00371173	0.10448	0	7.00893	7.34678	5.24568	1.44897	0.00023591	0.0693905	0.0144312	0.0452078	0.0102378	0.0717627
279.927	325.83	500	2	20	3	33.2351	21.0911	41.8218	79.9642	0.00278014	0.0713581	0	6.83687	6.71235	5.24467	1.05738	0	0.0490608	0.00607121	0.0234057	0.00612716	0.0256797
Sample	VPP
Modification	POx
Weight	0.7597	g
Volume	1	ml
TOS[h]	Temperature_measured[°C]	GHSV[h-1]	Butane_in[%vol]	Oxygen_in[%vol]	Steam_in[%vol]	Butane_Conversion_direct[%]	Oxygen_Conversion[%]	Butane_Conversion_product_based[%]	Selectivity_MAN_product_based[%]	Selectivity_1-Butene_product_based[%]	Selectivity_Ethane_product_based[%]	Selectivity_Ethene_product_based[%]	Selectivity_CO_product_based[%]	Selectivity_CO2_product_based[%]	Selectivity_Acetic_Acid_product_based[%]	Selectivity_Acrylic_Acid_product_based[%]	Selectivity_Furan_product_based[%]	Selectivity_Acetaldehyde_product_based[%]	Selectivity_Propane_product_based[%]	Selectivity_Propene_product_based[%]	Selectivity_2,5_Dihydrofuran_product_based[%]	Selectivity_Acrolein_product_based[%]
20.0375	252.364	2000	2	20	3	0	0	0.204257	43.4709	0.0865231	0	0	0	23.0773	16.5166	0	11.228	0	1.3081	0	4.03609	0.276532
32.3354	301.923	2000	2	20	3	0	0.585105	1.51246	64.1736	0.0624913	0.210517	0	3.93017	14.9319	9.06625	4.37206	2.29242	0	0.168275	0.246909	0.518706	0.0266354
44.6017	351.811	2000	2	20	3	8.62456	3.69572	8.90889	75.657	0.0174262	0.28854	0	5.32963	8.89386	4.72958	4.60018	0.233583	0	0.0367961	0.110261	0.0944042	0.00871662
56.6931	402.488	2000	2	20	3	34.7243	14.1877	38.2348	77.5654	0.00651641	0.187723	0	8.51081	9.22115	1.59086	2.80631	0.043079	0	0.0069075	0.0421776	0.0179429	0.00107924
70.3212	428.6	2000	2	20	3	62.0097	27.138	66.9981	75.6626	0.00314931	0.167104	0	11.1415	10.7646	0.687229	1.42565	0.129538	0	0.0022464	0.00720064	0.00887093	0.000391011
82.6949	402.96	2000	2	20	3	43.0719	18.2076	48.6902	78.704	0.00286844	0.151396	0	8.74045	8.5097	1.46933	1.90968	0.462685	0	0.00358113	0.0323346	0.013043	0.00093721
95.4532	352.046	2000	2	20	3	9.20887	5.92299	16.2122	81.0348	0.0059411	0.215529	0	5.1337	6.0372	4.18012	3.08858	0.16014	0	0.0221236	0.07337	0.0450539	0.00344389
108.477	302.026	2000	2	20	3	5.58752	1.45081	3.09518	77.2532	0.0130671	0.149863	0	3.25269	6.69538	8.33321	3.06258	0.727305	0	0.0832183	0.160041	0.25501	0.0144332
122.112	252.384	2000	2	20	3	4.98292	0.203508	0.4301	62.2549	0	0	0	0	11.7766	17.7268	0	5.545	0	0.614228	0	1.81139	0.271116
134.659	327.002	2000	2	20	3	8.26948	2.6948	7.76338	79.9263	0.00948768	0.14396	0	4.42378	5.93028	5.73657	3.20181	0.386721	0	0.0318613	0.0968101	0.0980019	0.0143896
154.728	327.034	4000	2	20	3	2.85935	1.61335	3.80982	78.8104	0.0075596	0.15595	0	3.12085	5.89695	6.93551	3.81624	0.81296	0	0.0664553	0.156988	0.209811	0.0103686
177.705	326.947	1000	2	20	3	9.35763	5.27126	15.5832	81.023	0.00420626	0.152227	0	4.81796	6.37378	5.01491	2.30142	0.190849	0	0.0196391	0.0600692	0.0400958	0.00183422
197.787	326.905	500	2	20	3	24.634	10.2766	25.205	85.6694	0.00523533	0.077886	0	3.50595	3.90862	4.61584	1.66629	0.521938	0	0.0043765	0.0121392	0.0123137	0
Sample	VPP
Modification	BOx
Weight	0.9219	g
Volume	1	ml
TOS[h]	Temperature_measured[°C]	GHSV[h-1]	Butane_in[%vol]	Oxygen_in[%vol]	Steam_in[%vol]	Butane_Conversion_direct[%]	Oxygen_Conversion[%]	Butane_Conversion_product_based[%]	Selectivity_MAN_product_based[%]	Selectivity_1-Butene_product_based[%]	Selectivity_Ethane_product_based[%]	Selectivity_Ethene_product_based[%]	Selectivity_CO_product_based[%]	Selectivity_CO2_product_based[%]	Selectivity_Acetic_Acid_product_based[%]	Selectivity_Acrylic_Acid_product_based[%]	Selectivity_Furan_product_based[%]	Selectivity_Acetaldehyde_product_based[%]	Selectivity_Propane_product_based[%]	Selectivity_Propene_product_based[%]	Selectivity_2,5_Dihydrofuran_product_based[%]	Selectivity_Acrolein_product_based[%]
25.7833	301.986	2000	2	20	3	11.9339	3.61839	8.11872	69.4631	0.0201359	0.122239	0	8.55485	10.721	8.26249	1.81897	0.849846	0	0.0372699	0.0925542	0.0468365	0.010759
37.9761	353.141	2000	2	20	3	41.9456	17.6135	46.447	75.5291	0.00393973	0.103422	0	9.20994	9.8529	3.7455	1.42125	0.000262936	0	0.00815303	0.0383383	0.00834785	0.0788808
50.1711	405.241	2000	2	20	3	90.2949	39.1723	91.7327	67.5069	0	0.0788726	0	15.0225	15.2244	1.06316	1.09249	0	0	0	0	0.00432992	0.00731849
62.2302	431.102	2000	2	20	3	99.5279	46.6252	99.5769	52.4161	0	0.0545986	0	22.6671	23.2643	0.324994	1.27284	0	0	0	0	0	0
74.4787	405.229	2000	2	20	3	89.0335	38.6468	90.831	68.824	0.00124728	0.0784674	0	14.6807	14.398	1.11628	0.890139	0	0	0	0.00383996	0.00497357	0.00233499
86.8326	378.954	2000	2	20	3	63.5285	26.4382	67.966	75.4141	0.00247699	0.0812575	0	10.5439	10.3379	2.43273	1.11044	0	0	0.00293838	0.0117977	0.0059316	0.0565564
99.5314	352.936	2000	2	20	3	37.4806	15.6838	41.5683	77.0948	0.00463775	0.0994861	0	8.35635	8.82903	4.07136	1.44664	0.0431929	0	0.00643705	0.0378683	0.0092737	0.000931772
112.514	302.09	2000	2	20	3	10.2315	4.31982	9.7342	75.8452	0.0116974	0.0800675	0	6.25638	7.98623	7.24908	1.75109	0.629743	0	0.0439617	0.089966	0.0404782	0.0160762
126.149	277.038	2000	2	20	3	4.49967	2.00076	3.68128	71.8562	0.00648664	0.0829189	0	6.21612	9.05535	9.17905	1.67895	1.53726	0	0.107774	0.168268	0.0981592	0.0134071
154.031	327.359	2000	2	20	3	19.4562	8.16506	21.9923	78.1811	0.00664647	0.145617	0	6.77767	7.59584	5.40834	1.60175	0.0548028	0	0.0168544	0.0492519	0.014539	0.147625
170.189	327.508	4000	2	20	3	13.1303	5.21504	10.8928	77.0033	0.0124864	0.122761	0	6.49348	7.18993	6.12739	2.3127	0.601037	0	0.026885	0.073191	0.0293547	0.00748667
190.34	327.091	1000	2	20	3	42.277	11.6603	43.3124	79.6634	0.00287095	0.0841766	0	6.76559	7.58154	4.73539	1.07716	0	0	0.00235383	0.0225686	0.0101891	0.054795
210.518	326.87	500	2	20	3	70.6311	14.5977	74.8485	73.2551	0.000635373	0.0979941	0	9.74788	12.6073	3.55272	0.721276	0	0	0	0	0.00877659	0.00835374
Sample	VPP
Modification	MnOx
Weight	1.0555	g
Volume	1	ml
TOS[h]	Temperature_measured[°C]	GHSV[h-1]	Butane_in[%vol]	Oxygen_in[%vol]	Steam_in[%vol]	Butane_Conversion_direct[%]	Oxygen_Conversion[%]	Butane_Conversion_product_based[%]	Selectivity_MAN_product_based[%]	Selectivity_1-Butene_product_based[%]	Selectivity_Ethane_product_based[%]	Selectivity_Ethene_product_based[%]	Selectivity_CO_product_based[%]	Selectivity_CO2_product_based[%]	Selectivity_Acetic_Acid_product_based[%]	Selectivity_Acrylic_Acid_product_based[%]	Selectivity_Furan_product_based[%]	Selectivity_Acetaldehyde_product_based[%]	Selectivity_Propane_product_based[%]	Selectivity_Propene_product_based[%]	Selectivity_2,5_Dihydrofuran_product_based[%]	Selectivity_Acrolein_product_based[%]
104.811	252.524	2000	2	20	3	2.94711	0.363975	1.15718	28.1103	0.132673	0	0	16.7777	8.76374	31.4067	2.77093	0.776144	2.39491	0.343333	0.354409	0.33146	7.83768
117.457	302.139	2000	2	20	3	3.97861	1.75912	4.84258	38.4462	0.0687471	0.07285	0	21.9256	11.6528	21.7604	2.65368	0.00633901	0.644837	0.0885476	0.223755	0.127978	2.3283
130.109	352.102	2000	2	20	3	15.1302	7.56265	17.869	44.9784	0.0436107	0.123373	0	28.0781	16.1375	7.53263	2.05635	0.00198352	0.302399	0.0270884	0.128472	0.0488275	0.541224
142.755	402.848	2000	2	20	3	49.8923	23.5975	53.1334	47.3933	0.0194788	0.111122	0	29.3272	19.9125	1.09647	1.63908	0	0.369896	0.00745881	0.0364322	0.0151101	0.0718977
155.21	428.467	2000	2	20	3	70.1159	34.9623	73.417	44.5136	0.014969	0.107837	0	29.2011	23.1317	0.516929	1.92143	0	0.547844	0.0035489	0.0182167	0.00371823	0.0190786
167.894	402.719	2000	2	20	3	45.6851	22.0559	52.4819	58.7	0.0143604	0.100269	0	21.225	16.8013	1.09711	1.6268	0	0.32455	0.00693198	0.0295199	0.0118059	0.0624108
180.945	352.115	2000	2	20	3	16.8887	7.49435	19.546	67.8325	0.0215417	0.134596	0	13.9859	11.6245	3.90151	2.00853	0	0.204553	0.020298	0.0881237	0.0255178	0.152383
194.284	302.138	2000	2	20	3	7.60439	2.68545	4.70513	67.3057	0.0329064	0.0815815	0	10.4441	9.92419	7.72334	2.782	0	0.315432	0.114307	0.223087	0.0883714	0.965018
208.184	252.498	2000	2	20	3	3.33854	0.256915	0.786207	55.168	0.108527	0	0	9.25403	11.783	13.6832	2.75899	0	1.25236	0.436724	0.493287	0.442363	4.61951
220.907	327.049	2000	2	20	3	8.96404	3.84063	9.75897	67.735	0.0243047	0.0869004	0	12.0582	10.6105	5.94458	2.431	0.00100413	0.230663	0.0566108	0.143045	0.0411936	0.636994
239.314	327.093	4000	2	20	3	6.73916	1.90077	5.14101	67.3434	0.045471	0.0933707	0	10.7756	9.60848	6.72213	3.54094	0	0.326658	0.082653	0.193556	0.0789103	1.18879
259.776	327.034	1000	2	20	3	13.8218	7.34951	18.0617	69.3151	0.0159694	0.108906	0	12.2539	11.4172	4.83945	1.59535	0.000410214	0.178422	0.0245423	0.0867469	0.023078	0.141003
280.257	327.004	500	2	20	3	22.6732	14.4305	25.9784	69.0348	0.0100574	0.112784	0	12.9115	11.3182	4.90206	1.40269	0	0.13962	0.0152158	0.0474873	0.0130146	0.0925489
Sample	SmMnO3
Modification	Base
Weight	0.9148	g
Volume	1	ml
TOS[h]	Temperature_measured[°C]	GHSV[h-1]	Butane_in[%vol]	Oxygen_in[%vol]	Steam_in[%vol]	Butane_Conversion_direct[%]	Oxygen_Conversion[%]	Butane_Conversion_product_based[%]	Selectivity_MAN_product_based[%]	Selectivity_1-Butene_product_based[%]	Selectivity_Ethane_product_based[%]	Selectivity_Ethene_product_based[%]	Selectivity_CO_product_based[%]	Selectivity_CO2_product_based[%]	Selectivity_Acetic_Acid_product_based[%]	Selectivity_Acrylic_Acid_product_based[%]	Selectivity_Furan_product_based[%]	Selectivity_Acetaldehyde_product_based[%]	Selectivity_Propane_product_based[%]	Selectivity_Propene_product_based[%]	Selectivity_2,5_Dihydrofuran_product_based[%]	Selectivity_Acrolein_product_based[%]
19.1526	229.423	2000	2	20	3	23.4872	12.8898	20.1514	0	1.47212	0	0	0.209202	98.1938	0	0	0	0.0282501	0.0177169	0.0789158	0	0
31.7281	258.4	2000	2	20	3	51.0926	33.6499	50.9437	0	0.601458	0	0	0.113284	99.1811	0.0503012	0	0	0.00782846	0.00718866	0.0388054	0	0
44.2482	289.551	2000	2	20	3	85.5992	60.1142	85.9664	0.0278052	0.147181	0	0	0.0457489	99.7443	0.0147174	0	0	0.00250123	0.00311743	0.0146523	0	0
118.897	289.303	2000	2	20	3	83.4787	58.3307	84.0833	0.0554453	0.177596	0	0	0.0605036	99.6868	0	0	0	0.00315028	0.00255765	0.013959	0	0
138.235	289.298	2000	2	20	3	83.151	58.2591	83.9345	0.0675064	0.18099	0	0	0.0667479	99.6641	0	0	0	0.00305359	0.002599	0.0149792	0	0
157.204	289.129	2000	2	20	3	83.3002	58.6806	83.8856	0.0697909	0.183372	0	0	0.0682649	99.6475	0.00752323	0	0	0.00288464	0.00375396	0.0169322	0	0
207.54	289.075	2000	2	20	3	82.6663	58.266	83.6833	0.0480565	0.186378	0	0	0.0611589	99.6747	0.00728164	0	0	0.00274475	0.00302105	0.0166313	0	0
220.767	257.418	2000	2	20	3	45.3418	30.1132	45.2052	0.0126736	0.80451	0	0	0.172409	98.9119	0.0331856	0	0	0.00977103	0.00944633	0.0460732	0	0
234.578	229.065	2000	2	20	3	20.163	11.0668	17.2187	0	1.98204	0	0	0.317072	97.5412	0	0	0	0.0353361	0.0269017	0.0974805	0	0
263.899	229.086	2000	2	20	3	18.3784	10.9122	17.1393	0.0378216	2.06919	0	0	0.334993	97.287	0.118576	0	0	0.0360922	0.0239031	0.092392	0	0
284.347	229.313	4000	2	20	3	11.4681	6.3575	9.91904	0	3.7014	0	0	0.55765	95.433	0.0599963	0	0	0.0635798	0.0476055	0.136745	0	0
306.764	228.646	1000	2	20	3	28.3217	18.0246	27.3855	0.107493	1.18104	0	0	0.212907	98.3142	0.0776778	0	0	0.0222576	0.0161714	0.0682466	0	0
345.244	228.419	500	2	20	3	40.1071	30.7247	39.4098	0.153173	0.750717	0	0	0.186045	98.7712	0.0755858	0	0	0.017274	0.0089421	0.0370332	0	0
Sample	SmMnO3
Modification	POx
Weight	1.0069	g
Volume	1	ml
TOS[h]	Temperature_measured[°C]	GHSV[h-1]	Butane_in[%vol]	Oxygen_in[%vol]	Steam_in[%vol]	Butane_Conversion_direct[%]	Oxygen_Conversion[%]	Butane_Conversion_product_based[%]	Selectivity_MAN_product_based[%]	Selectivity_1-Butene_product_based[%]	Selectivity_Ethane_product_based[%]	Selectivity_Ethene_product_based[%]	Selectivity_CO_product_based[%]	Selectivity_CO2_product_based[%]	Selectivity_Acetic_Acid_product_based[%]	Selectivity_Acrylic_Acid_product_based[%]	Selectivity_Furan_product_based[%]	Selectivity_Acetaldehyde_product_based[%]	Selectivity_Propane_product_based[%]	Selectivity_Propene_product_based[%]	Selectivity_2,5_Dihydrofuran_product_based[%]	Selectivity_Acrolein_product_based[%]
27.6871	227.868	2000	2	20	3	13.5862	4.66538	7.64562	0	3.76032	0.0124548	0	0.805796	93.6524	0	0	1.50336	0	0.049341	0.161357	0.0508835	0.00408854
39.8794	253.983	2000	2	20	3	23.5559	12.2026	19.5991	0.0359576	2.0157	0	0	0.504358	96.8513	0.0368364	0	0.397201	0	0.0185903	0.120654	0.0176722	0.00169551
52.0748	281.87	2000	2	20	3	46.5532	28.5696	44.6495	0.094417	0.967178	0.00389875	0	0.270408	98.2751	0	0.0505539	0.262044	0	0.00707298	0.0619343	0.00497593	0.00243244
64.1365	312.323	2000	2	20	3	81.2187	53.0214	80.6339	0.0623278	0.273034	0.0147925	0	0.0694999	99.4808	0	0.0374107	0	0	0.0010439	0.021893	0.00659764	0.0325612
76.3956	312.072	2000	2	20	3	79.6122	52.0757	79.4432	0.070386	0.299672	0.0147784	0	0.0846015	99.4078	0	0.0529057	0	0	0.00337857	0.0273253	0.00803433	0.031073
88.7527	312.031	2000	2	20	3	78.8613	51.6902	78.4794	0.0785665	0.318849	0.0161028	0	0.0806576	99.3769	0.0166169	0.0348695	0	0	0.00058478	0.0242672	0.00790575	0.0446685
101.442	281.147	2000	2	20	3	39.75	25.1737	39.2688	0.106199	1.22579	0.0268252	0	0.340913	97.9511	0.0374658	0.0313377	0.16514	0	0.00958126	0.092996	0.00905486	0.00360254
114.428	253.566	2000	2	20	3	19.3275	10.0311	16.0063	0.0610718	2.66128	0	0	0.641338	95.9199	0.14195	0	0.40509	0	0.0184634	0.126188	0.0231839	0.00149542
128.061	227.702	2000	2	20	3	10.2874	3.66388	6.0815	0	4.91639	0.0212358	0	1.00393	92.3847	0.27409	0	1.09661	0	0.0552168	0.173521	0.0554043	0.0188797
155.955	253.664	2000	2	20	3	18.7945	10.1261	16.689	0.220151	2.51321	0	0	0.377589	95.5939	0.0690226	0	0.00261755	0	0.0222986	0.131292	0.0214324	1.04846
172.12	253.983	4000	2	20	3	10.3249	6.25252	8.62515	0.135125	5.17345	0	0	0.943037	93.1452	0	0	0.35686	0	0.0353876	0.17806	0.0329162	0
192.275	253.079	1000	2	20	3	33.2176	14.0263	27.9307	0.301907	1.29781	0	0	0.21352	97.8432	0	0	0	0	0.00822624	0.0813799	0.0215504	0.232385
212.455	252.627	500	2	20	3	58.55	16.7369	57.3718	0.340496	0.347868	0	0	0.266262	98.8495	0	0.0860672	0	0	0	0.053823	0.0140616	0.0419374
Sample	SmMnO3
Modification	BOx
Weight	0.8662	g
Volume	1	ml
TOS[h]	Temperature_measured[°C]	GHSV[h-1]	Butane_in[%vol]	Oxygen_in[%vol]	Steam_in[%vol]	Butane_Conversion_direct[%]	Oxygen_Conversion[%]	Butane_Conversion_product_based[%]	Selectivity_MAN_product_based[%]	Selectivity_1-Butene_product_based[%]	Selectivity_Ethane_product_based[%]	Selectivity_Ethene_product_based[%]	Selectivity_CO_product_based[%]	Selectivity_CO2_product_based[%]	Selectivity_Acetic_Acid_product_based[%]	Selectivity_Acrylic_Acid_product_based[%]	Selectivity_Furan_product_based[%]	Selectivity_Acetaldehyde_product_based[%]	Selectivity_Propane_product_based[%]	Selectivity_Propene_product_based[%]	Selectivity_2,5_Dihydrofuran_product_based[%]	Selectivity_Acrolein_product_based[%]
55.1686	228.011	2000	2	20	3	5.2332	1.44071	2.30296	0	8.44898	0.0156287	0	2.86581	84.5264	3.25751	0	0	0.333896	0.23565	0.316102	0	0
67.7639	253.109	2000	2	20	3	10.1251	3.83395	5.98483	0	5.91836	0.0270171	0	2.33466	89.2435	1.96696	0	0	0.138468	0.111713	0.25936	0	0
80.3938	278.705	2000	2	20	3	16.5224	8.60446	13.8043	0.182997	3.78712	0.0669958	0	1.81254	92.5995	1.22679	0	0	0.064114	0.0421548	0.217753	0	0
92.9666	305.171	2000	2	20	3	31.2437	18.3674	29.0873	0.160256	2.2435	0.0964775	0	1.33864	95.2413	0.683791	0	0	0.0325152	0.0215121	0.181995	0	0
105.494	364.226	2000	2	20	3	88.2656	61.1213	89.0179	0.0759868	0.254374	0.0661	0	0.341338	98.9829	0.228892	0.00881938	0	0.00444719	0.00334126	0.0337725	0	0
118.354	333.604	2000	2	20	3	57.2933	35.9938	57.5782	0.091284	1.02747	0.03721	0	0.627155	97.6967	0.40578	0	0	0.0138748	0.00963068	0.0909445	0	0
131.473	305.226	2000	2	20	3	29.4125	18.5622	28.6926	0.106124	2.1891	0.0843132	0	0.923173	95.8605	0.611055	0	0	0.030472	0.0234882	0.171822	0	0
144.874	278.677	2000	2	20	3	12.089	8.24914	12.8467	0	3.69112	0.0689576	0	1.26514	93.7721	0.885745	0	0	0.0656345	0.0514676	0.199882	0	0
158.886	253.073	2000	2	20	3	12.1268	3.27634	5.58348	0	5.41576	0.0131945	0	1.58716	90.8622	1.62554	0	0	0.141925	0.116233	0.238025	0	0
171.824	253.086	2000	2	20	3	14.3431	3.57866	5.69771	0	5.37472	0.0131962	0	1.56694	91.1827	1.38749	0	0	0.141923	0.0999562	0.233084	0	0
192.257	253.132	4000	2	20	3	6.25892	2.1553	3.02595	0	8.06118	0	0	2.19569	87.5569	1.44993	0	0	0.247343	0.19082	0.298093	0	0
214.729	253.088	1000	2	20	3	13.6207	7.27722	10.8308	0	3.16403	0	0	0.930979	94.1687	1.41866	0	0.0136698	0.0814329	0.055031	0.167451	0	0
239.272	253.081	500	2	20	3	19.457	14.5501	17.1597	0.197673	2.00663	0	0	0.681617	95.0001	1.90132	0	0	0.0546264	0.03056	0.127474	0	0
Sample	SmMnO3
Modification	MnOx
Weight	0.8981	g
Volume	1	ml
TOS[h]	Temperature_measured[°C]	GHSV[h-1]	Butane_in[%vol]	Oxygen_in[%vol]	Steam_in[%vol]	Butane_Conversion_direct[%]	Oxygen_Conversion[%]	Butane_Conversion_product_based[%]	Selectivity_MAN_product_based[%]	Selectivity_1-Butene_product_based[%]	Selectivity_Ethane_product_based[%]	Selectivity_Ethene_product_based[%]	Selectivity_CO_product_based[%]	Selectivity_CO2_product_based[%]	Selectivity_Acetic_Acid_product_based[%]	Selectivity_Acrylic_Acid_product_based[%]	Selectivity_Furan_product_based[%]	Selectivity_Acetaldehyde_product_based[%]	Selectivity_Propane_product_based[%]	Selectivity_Propene_product_based[%]	Selectivity_2,5_Dihydrofuran_product_based[%]	Selectivity_Acrolein_product_based[%]
18.8198	227.568	2000	2	20	3	29.2188	17.5431	26.6954	0	1.13299	0	0	0.237254	98.491	0.0475858	0	0	0.0192887	0.0146838	0.0571909	0	0
31.3996	253.077	2000	2	20	3	57.074	38.2894	57.189	0.0400677	0.489108	0	0	0.144885	99.224	0.0593356	0	0	0.0064118	0.00590056	0.0302618	0	0
43.9194	278.79	2000	2	20	3	87.1989	61.0294	87.392	0.0666107	0.129986	0	0	0.0738761	99.6836	0.0299535	0	0	0.00264076	0.00131991	0.0120607	0	0
118.567	278.735	2000	2	20	3	85.3919	59.9813	85.866	0.121989	0.158139	0	0	0.104929	99.5708	0.0155208	0.0136805	0	0.00311542	0.000700042	0.0110958	0	0
137.906	278.724	2000	2	20	3	85.0591	59.5601	85.7718	0.155669	0.161675	0	0	0.131159	99.5094	0	0.0215509	0	0.00313541	0.00282432	0.0145968	0	0
156.875	278.718	2000	2	20	3	85.5733	60.6489	86.0068	0.175967	0.160549	0	0	0.130908	99.4835	0.00736032	0.0207997	0	0.00288042	0.00301815	0.0150581	0	0
169.423	278.703	2000	2	20	3	85.3816	58.9876	85.6185	0.163657	0.164383	0	0	0.13297	99.4888	0.00651611	0.0219738	0	0.00293913	0.00301094	0.0157096	0	0
181.895	278.693	2000	2	20	3	85.5154	59.515	85.835	0.151193	0.162506	0	0	0.132751	99.5079	0	0.0247118	0	0.00287337	0.00279076	0.0152872	0	0
194.424	278.689	2000	2	20	3	85.4283	60.0713	85.9108	0.154938	0.161024	0	0	0.114579	99.5131	0.0208452	0.0162409	0	0.00264786	0.00215564	0.0145184	0	0
207.212	278.687	2000	2	20	3	85.0101	60.2721	85.8674	0.0924231	0.15873	0	0	0.0919628	99.6041	0.0322966	0	0	0.00244113	0.00313242	0.0148866	0	0
220.438	252.959	2000	2	20	3	53.5397	36.1909	53.7932	0.0621186	0.599239	0	0	0.191408	99.0445	0.0544587	0	0	0.00711886	0.00752221	0.0335973	0	0
234.249	227.48	2000	2	20	3	26.4093	15.8527	23.8322	0	1.42013	0	0	0.321154	98.0579	0.086451	0	0	0.0223376	0.01849	0.0734992	0	0
263.567	227.501	2000	2	20	3	24.5871	15.6594	23.6799	0.155991	1.50425	0	0	0.358325	97.7454	0.126765	0	0	0.0227637	0.0163966	0.0700775	0	0
284.013	227.585	4000	2	20	3	17.6158	9.67752	14.6178	0.100383	2.56728	0	0	0.558919	96.5186	0.0890629	0	0	0.0417451	0.0283525	0.0956646	0	0
306.429	227.387	1000	2	20	3	39.0433	24.6016	36.9276	0.171696	0.817438	0	0	0.291173	98.5467	0.0952297	0	0	0.0139576	0.0105148	0.0532773	0	0
344.913	227.362	500	2	20	3	50.5387	40.3561	50.6172	0.267221	0.506647	0	0	0.412137	98.639	0.106867	0.0240329	0	0.0106455	0.00702888	0.0263724	0	0
