# Supplementary material for: Tuning catalysis by surface-deposition of elements on oxidation catalystsviaatomic layer deposition
Source: Royal Society of Chemistry journal article supplement (doi:10.1039/d2cy02184f), 2023-01-01
Supplement: d2cy02184f2.pdf [file d2cy02184f2.pdf]

## Supporting Information

### Tuning Catalysis by Surface-Deposition of Elements on Oxidation Catalysts via Atomic Layer Deposition

Frederik R  ther,<sup>a</sup> Robert Baumgarten,<sup>a</sup> Fabian Ebert,<sup>a</sup> Esteban Gioria,<sup>a</sup>

Raoul Naumann d'Alnoncourt,<sup>a†</sup> Annette Trunschke,<sup>b</sup> and Frank Rosowski<sup>c,a</sup>

<sup>a</sup> BasCat - UniCat BASF JointLab, Technische Universit  t Berlin, D-10623 Berlin, Germany

<sup>b</sup> Department of Inorganic Chemistry, Fritz Haber Institute of the Max Planck Society, D-14195  
Berlin, Germany

<sup>c</sup> BASF SE, Catalysis Research, D-67065 Ludwigshafen, Germany

<sup>†</sup> Corresponding Author; Email-address: [r.naumann@bascat.tu-berlin.de](mailto:r.naumann@bascat.tu-berlin.de)

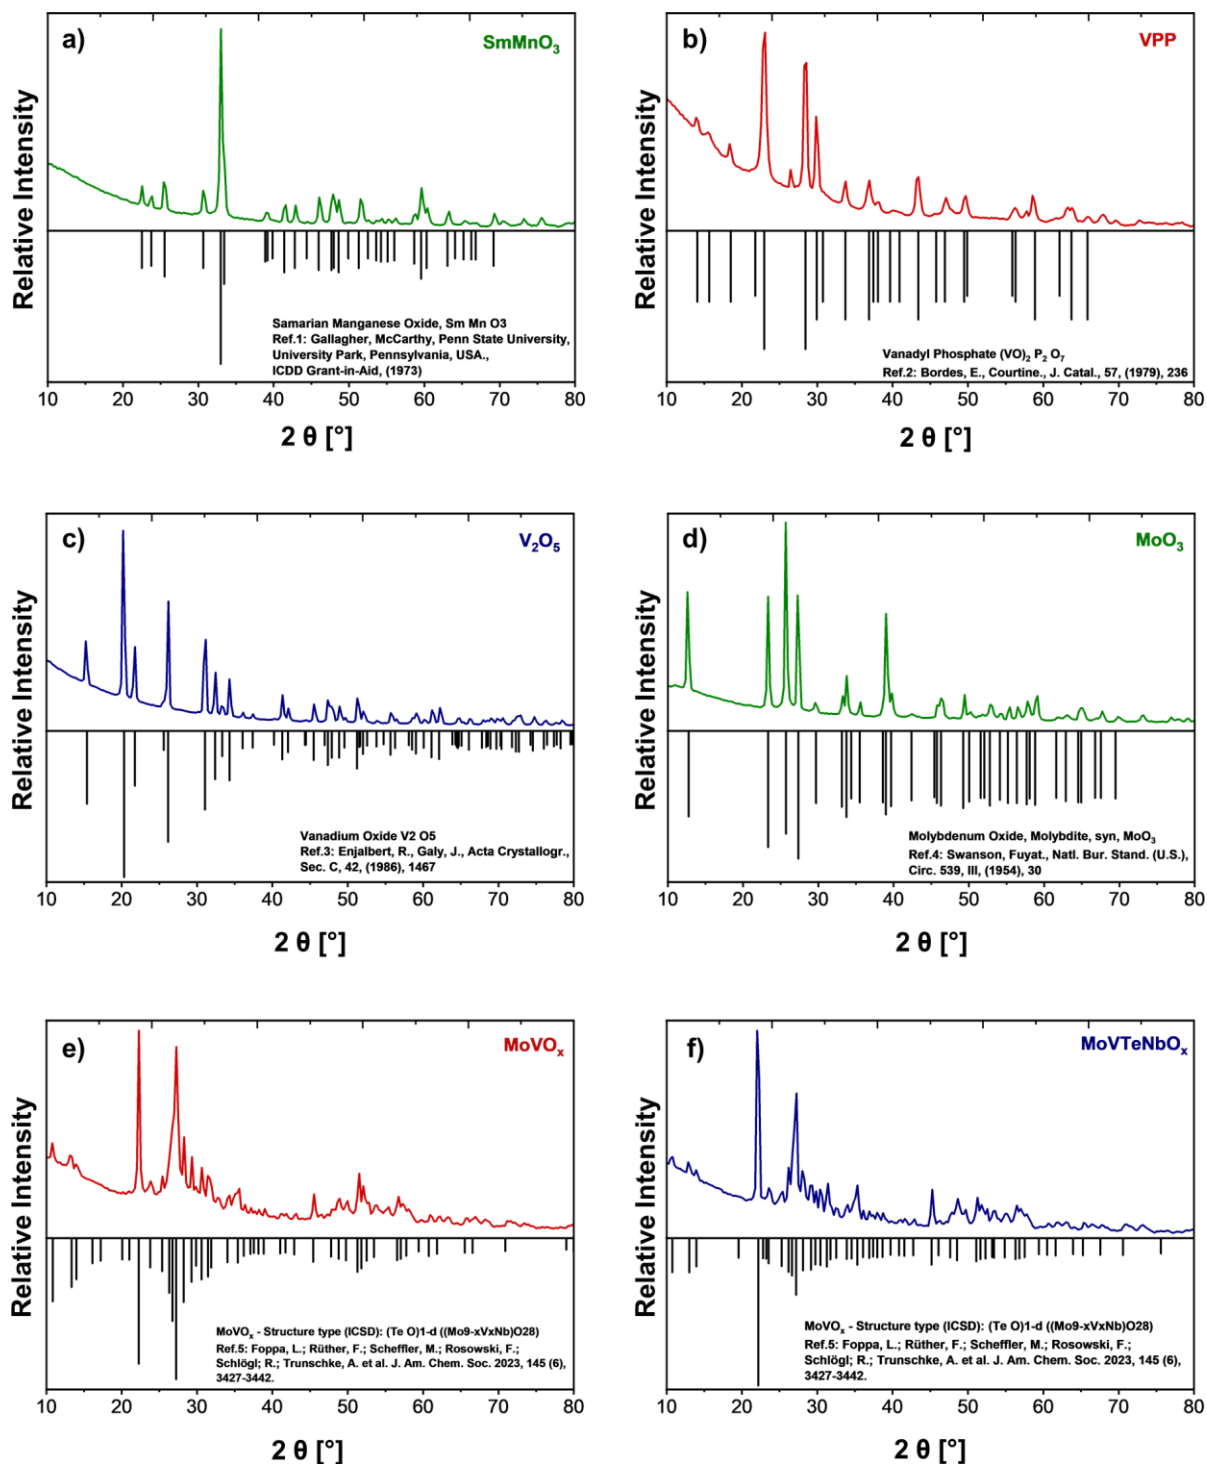

**Figure S11.** XRPD patterns of the five base catalysts (a)  $\text{SmMnO}_3$ , (b) VPP, (c)  $\text{V}_2\text{O}_5$ , (d)  $\text{MoO}_3$ , (e)  $\text{MoVO}_x$ , and (f)  $\text{MoVTenbO}_x$  before catalysis (fresh) in the angular range  $10^\circ \leq 2\theta < 80^\circ$ , main reflections of reference crystal structures (a)  $\text{SmMnO}_3$ <sup>1</sup>, (b) VPP<sup>2</sup>, (c)  $\text{V}_2\text{O}_5$ <sup>3</sup>, (d)  $\text{MoO}_3$ <sup>4</sup>, (e)  $\text{MoVO}_x$ <sup>5</sup>, and (f)  $\text{MoVTenbO}_x$ <sup>5</sup> shown below for phase identification.

**Table SI1.** Results of N<sub>2</sub>-physorption measurements of the six base catalysts MoVTenbO<sub>x</sub>, MoVO<sub>x</sub>, MoO<sub>3</sub>, V<sub>2</sub>O<sub>5</sub>, VPP, and SmMnO<sub>3</sub>: Specific BET surface area and specific pore volume of fresh samples; Calculation according to the BJH pore size distribution based on the N<sub>2</sub>-desorption.

| Catalyst                                   | MoVTenbO <sub>x</sub> | MoVO <sub>x</sub> | V <sub>2</sub> O <sub>5</sub> | VPP   | MoO <sub>3</sub> | SmMnO <sub>3</sub> |
|--------------------------------------------|-----------------------|-------------------|-------------------------------|-------|------------------|--------------------|
| BET surface area [m <sup>2</sup> /g]       | 7.7                   | 36.2              | 6.6                           | 25.6  | 3.1              | 7.5                |
| Pore-V <sub>BJH</sub> [cm <sup>3</sup> /g] | 0.016                 | 0.172             | 0.025                         | 0.181 | 0.015            | 0.028              |

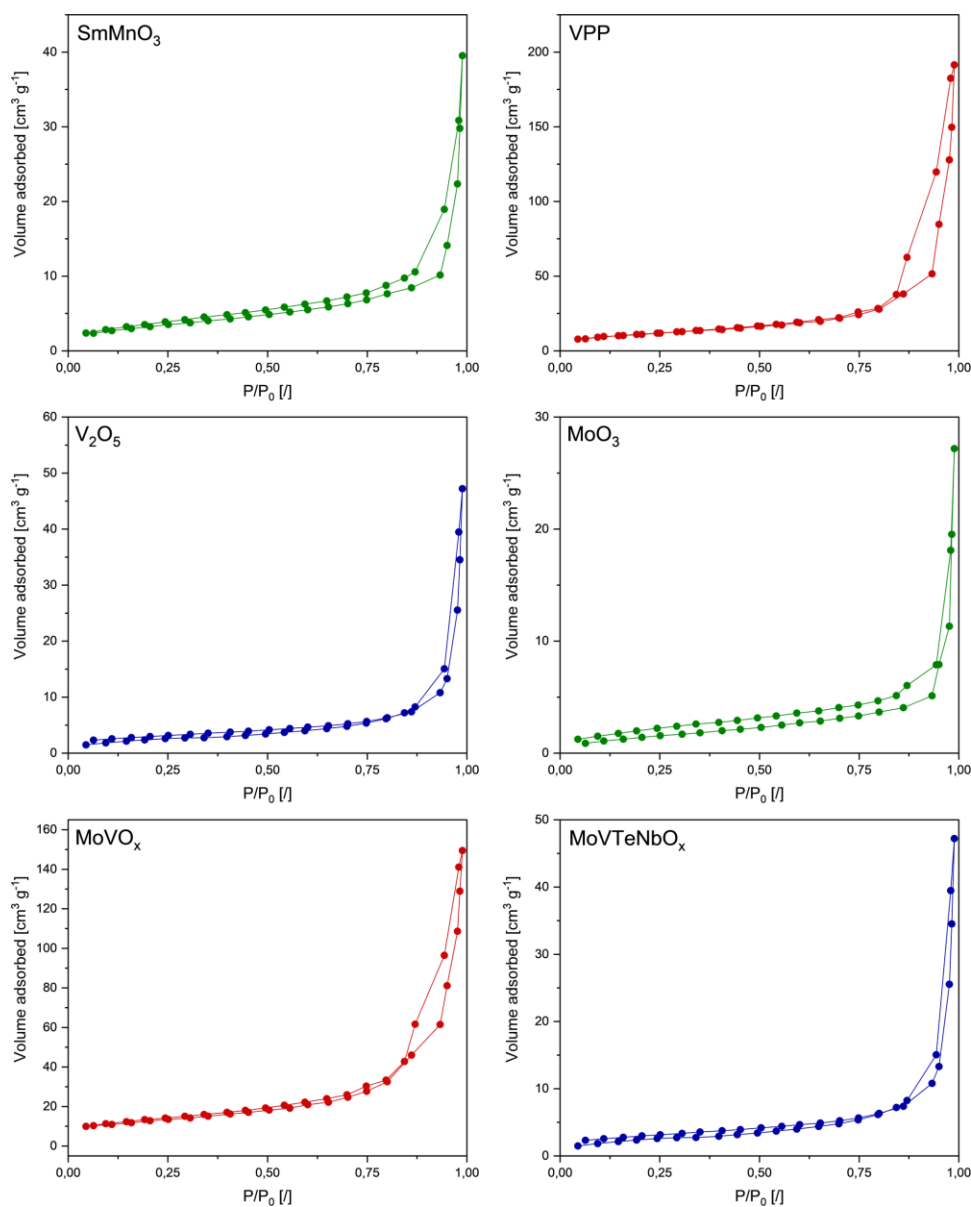

**Figure SI2.** N<sub>2</sub>-physorption measurement curves of adsorption and desorption: Comparison between the five base catalysts MoVTenbO<sub>x</sub>, MoVO<sub>x</sub>, MoO<sub>3</sub>, V<sub>2</sub>O<sub>5</sub>, VPP, and SmMnO<sub>3</sub> before catalysis (fresh).

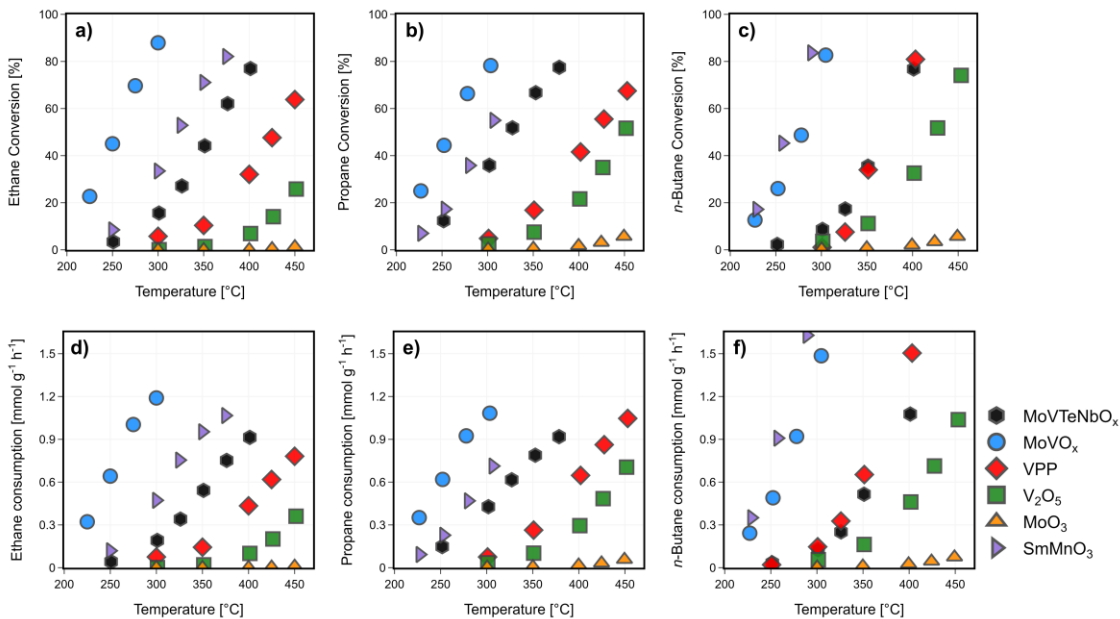

**Figure S13.** Catalytic activity of MoVTenbO<sub>x</sub>, MoVO<sub>x</sub>, MoO<sub>3</sub>, V<sub>2</sub>O<sub>5</sub>, VPP, and SmMnO<sub>3</sub>: Alkane conversion [%] and alkane consumption rates normalized to the catalyst mass [mmol g<sup>-1</sup> h<sup>-1</sup>] as a function of the reaction temperature in (a, d) ethane, (b, e) propane, and (c, f) *n*-butane oxidation; C<sub>2</sub>H<sub>6</sub>/O<sub>2</sub>/H<sub>2</sub>O=3/9/0 %vol, C<sub>3</sub>H<sub>8</sub>/O<sub>2</sub>/H<sub>2</sub>O=3/9/20 %vol, C<sub>4</sub>H<sub>10</sub>/O<sub>2</sub>/H<sub>2</sub>O=2/20/3 %vol, 1 atm, 1000 h<sup>-1</sup> (C<sub>2</sub>, C<sub>3</sub>) / 2000 h<sup>-1</sup> (C<sub>4</sub>).

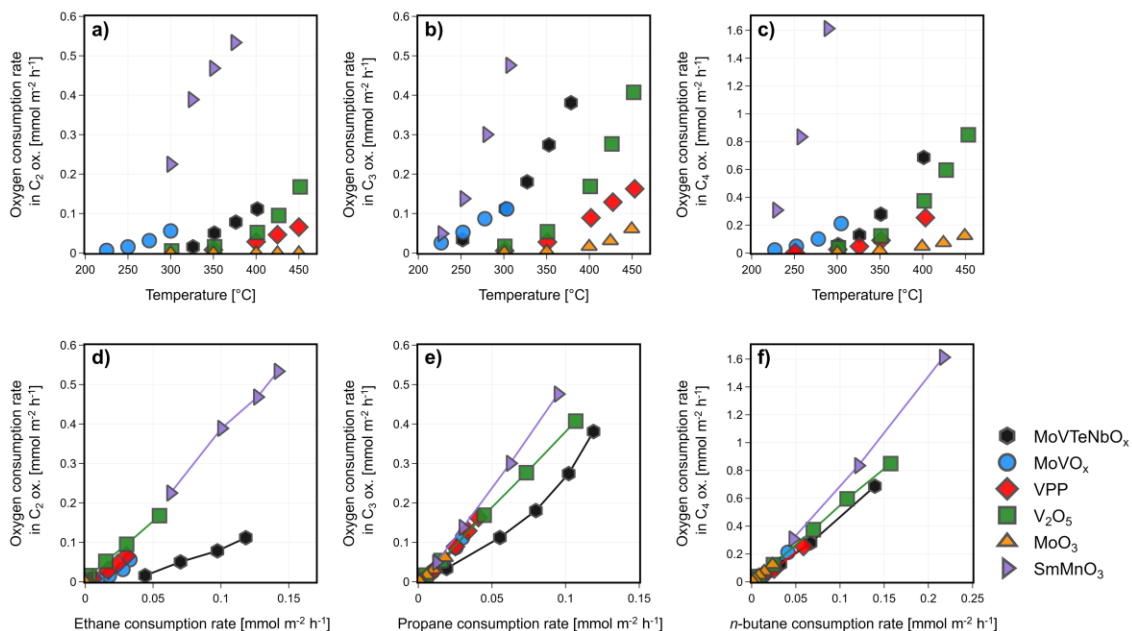

**Figure S14.** Catalytic activity of MoVTenbO<sub>x</sub>, MoVO<sub>x</sub>, MoO<sub>3</sub>, V<sub>2</sub>O<sub>5</sub>, VPP, and SmMnO<sub>3</sub>: Oxygen consumption rates normalized to the catalyst mass [mmol m<sup>-2</sup> h<sup>-1</sup>] as a function of the reaction temperature in (a) ethane, (b) propane, and (c) *n*-butane oxidation; oxygen consumption rate as a function of the consumption rate of the respective alkane (d) ethane, (e) propane, and (f) *n*-butane; C<sub>2</sub>H<sub>6</sub>/O<sub>2</sub>/H<sub>2</sub>O=3/9/0 %vol, C<sub>3</sub>H<sub>8</sub>/O<sub>2</sub>/H<sub>2</sub>O=3/9/20 %vol, C<sub>4</sub>H<sub>10</sub>/O<sub>2</sub>/H<sub>2</sub>O=2/20/3 %vol, 1 atm, 1000 h<sup>-1</sup> (C<sub>2</sub>, C<sub>3</sub>) / 2000 h<sup>-1</sup> (C<sub>4</sub>).

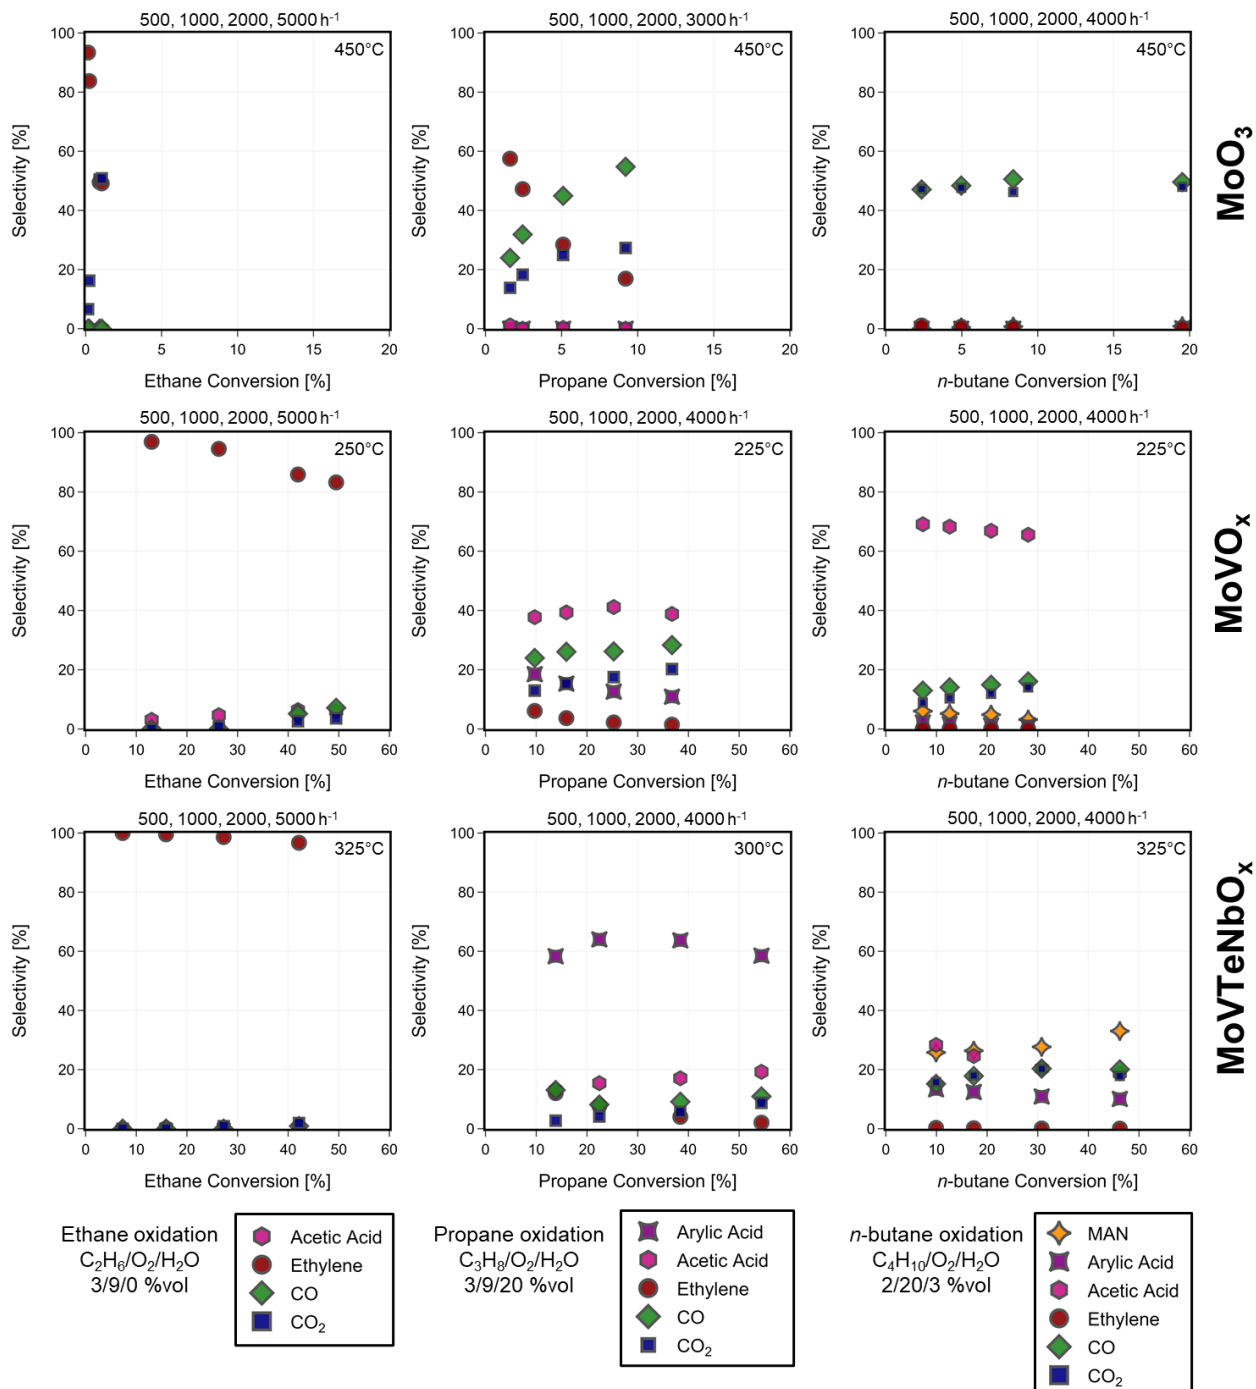

**Figure S15.** GHSV variation study of MoO<sub>3</sub>, MoVO<sub>x</sub>, and MoVTenbO<sub>x</sub>: The temperature is fixed to a setpoint of  $X_{alkane} = 15\%$  based on the previously performed temperature variation study; the temperature- and GHSV-setpoints are indicated within the diagrams;  $C_2H_6/O_2/H_2O=3/9/0$  %vol,  $C_3H_8/O_2/H_2O=3/9/20$  %vol,  $C_4H_{10}/O_2/H_2O=2/20/3$  %vol,  $500 \leq GHSV \leq 5000$ , 1 atm.

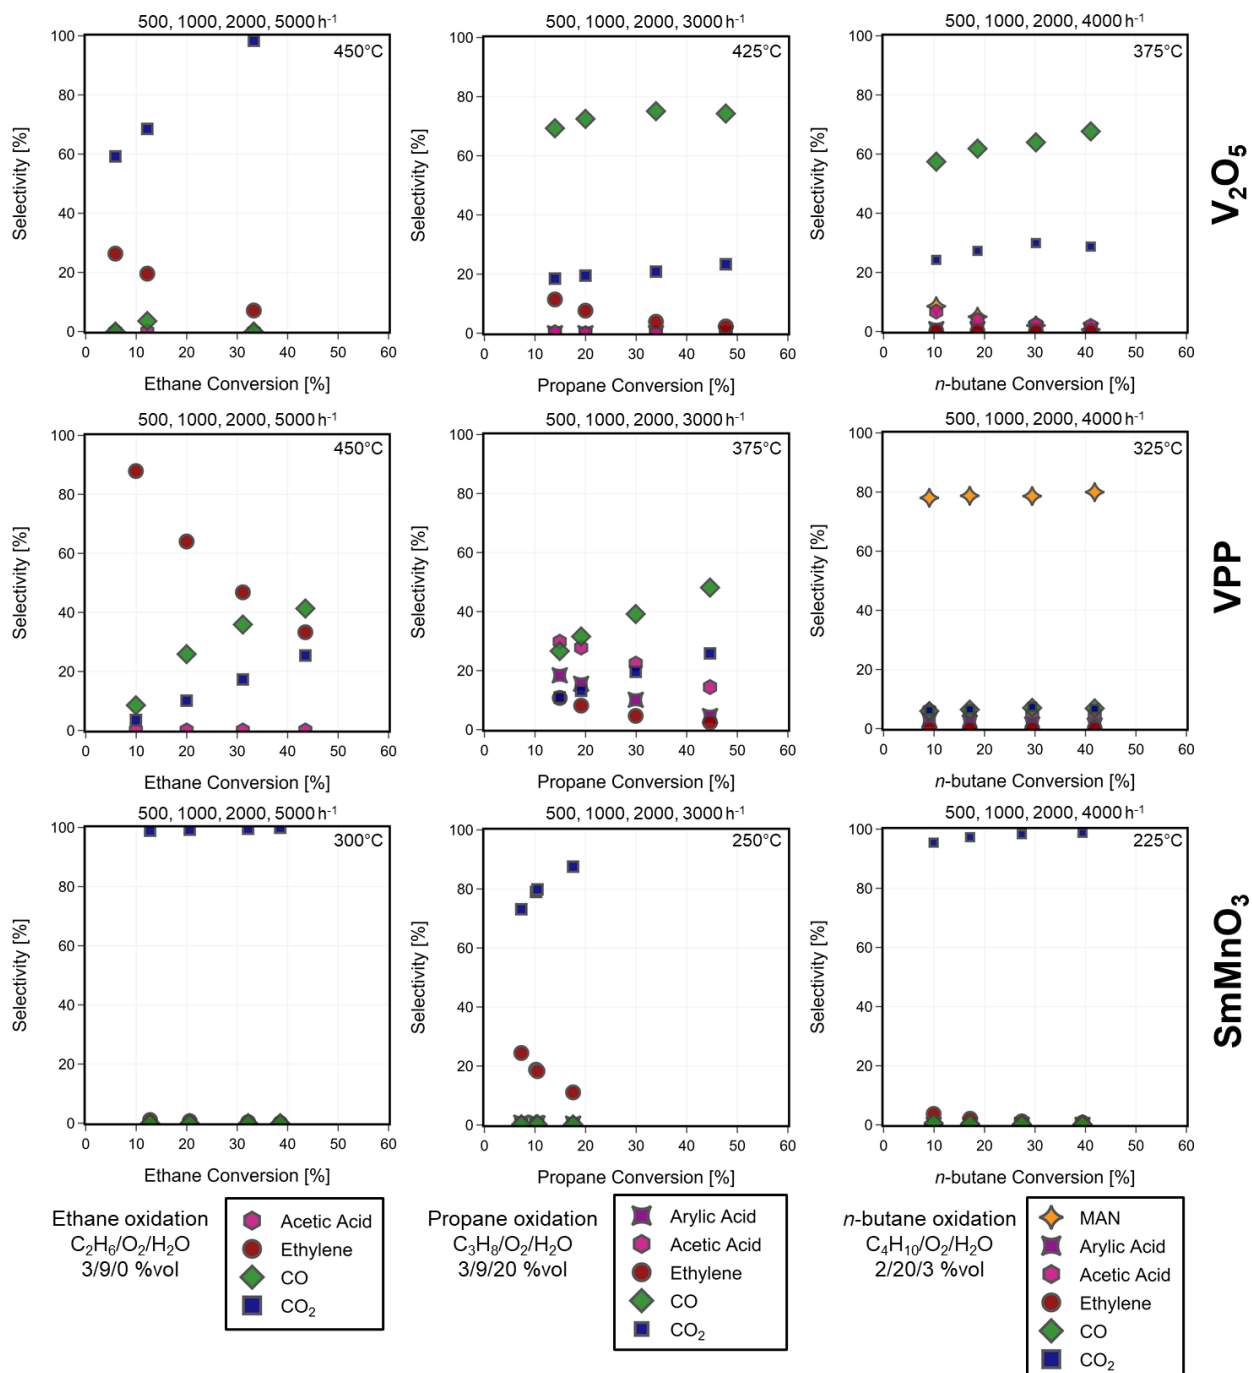

**Figure S16.** GHSV variation study of  $V_2O_5$ , VPP, and  $SmMnO_3$ : The temperature is fixed to a setpoint of  $X_{alkane} = 15\%$  based on the previously performed temperature variation study; the temperature- and GHSV-setpoints are indicated within the diagrams;  $C_2H_6/O_2/H_2O=3/9/0$  %vol,  $C_3H_8/O_2/H_2O=3/9/20$  %vol,  $C_4H_{10}/O_2/H_2O=2/20/3$  %vol,  $500 \leq GHSV \leq 5000$ , 1 atm.

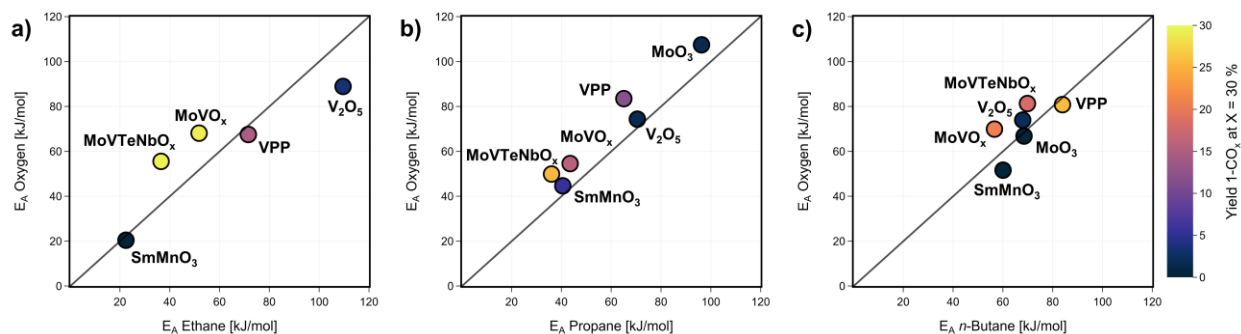

**Figure S17.** Apparent activation energies of (a) ethane, (b) propane, (c) *n*-butane, and oxygen in respective reaction calculated based on the temperature variation study; Colour-coding indicates the yield towards partial oxidation products (1-CO<sub>x</sub>); Due to the very low conversion the activation energies of MoO<sub>3</sub> in ethane oxidation are not defined; C<sub>2</sub>H<sub>6</sub>/O<sub>2</sub>/H<sub>2</sub>O=3/9/0 %vol, C<sub>3</sub>H<sub>8</sub>/O<sub>2</sub>/H<sub>2</sub>O=3/9/20 %vol, C<sub>4</sub>H<sub>10</sub>/O<sub>2</sub>/H<sub>2</sub>O=2/20/3 %vol, 1 atm, 1000 h<sup>-1</sup> (C<sub>2</sub>, C<sub>3</sub>) / 2000 h<sup>-1</sup> (C<sub>4</sub>).

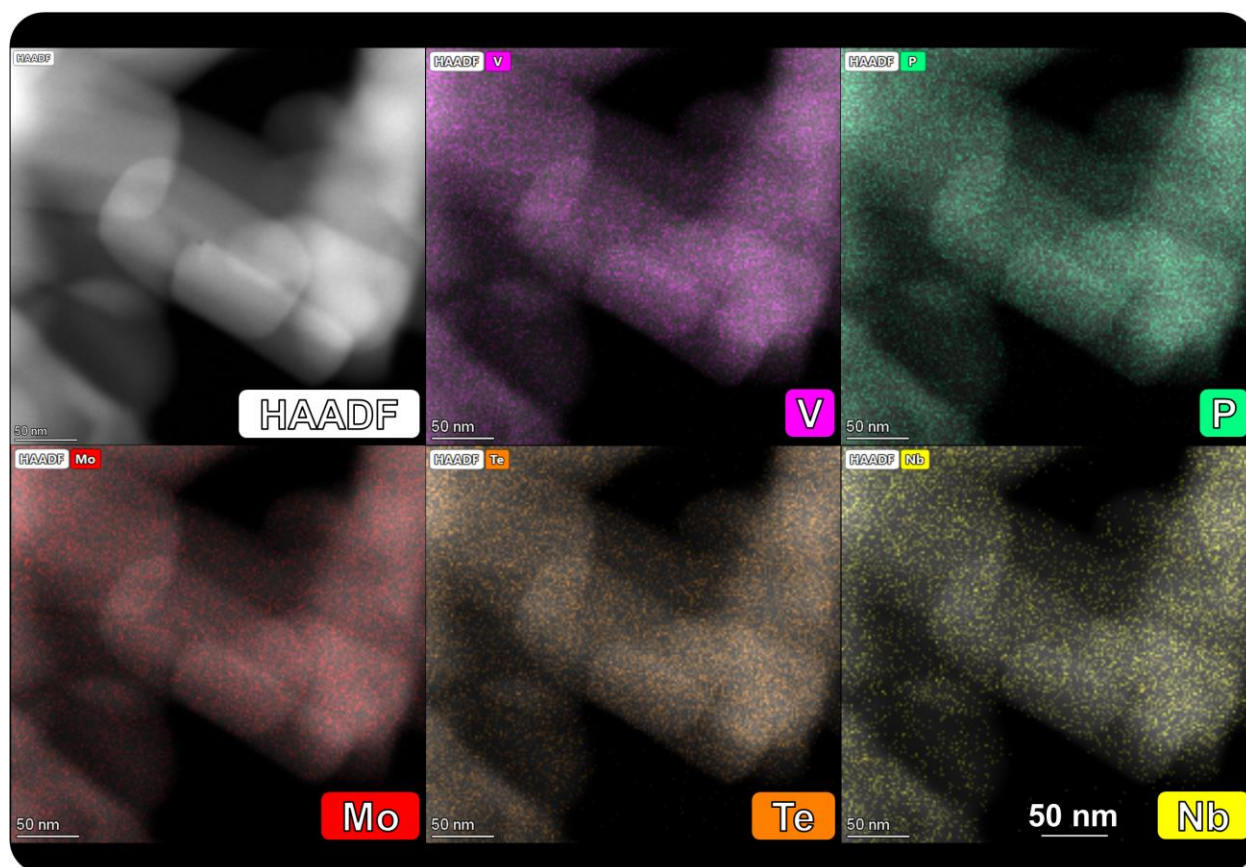

**Figure S18.** STEM-HAADF images (50 nm) of PO<sub>x</sub> surface modified MoVTeNbO<sub>x</sub> before catalysis (fresh sample): EDX-mappings show element dispersion of both bulk elements (Mo, V, Te, Nb) and the additionally deposited phosphorus (PO<sub>x</sub>).

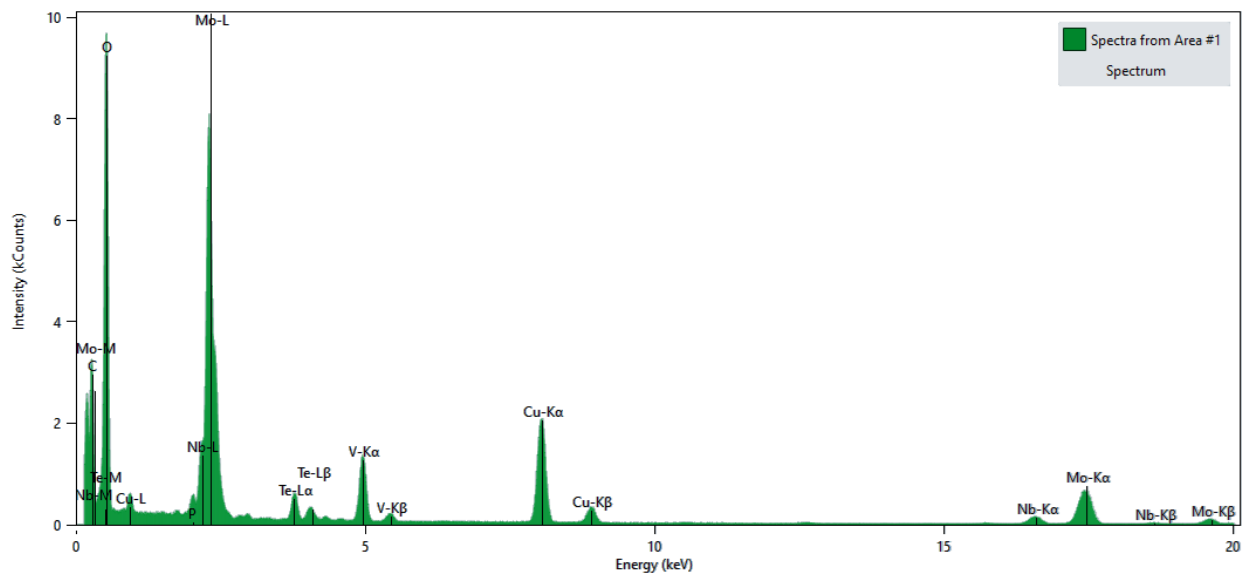

**Figure S19.** STEM-EDX mapping spectra of PO<sub>x</sub> surface modified MoVTenbO<sub>x</sub> after catalysis (spent sample).

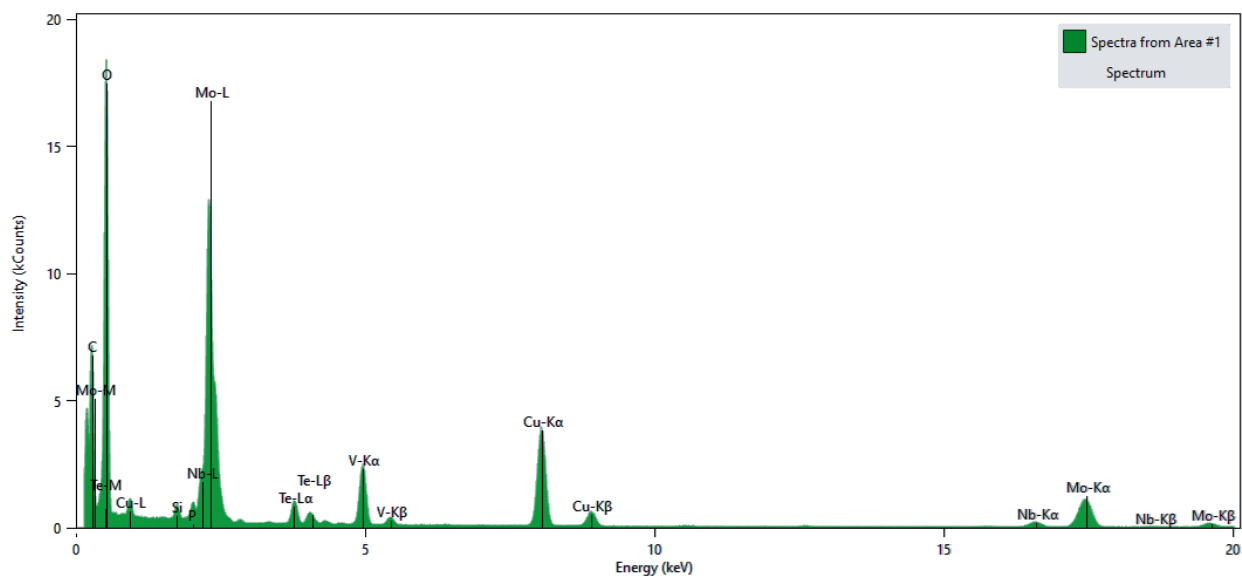

**Figure S110.** STEM-EDX mapping spectra of PO<sub>x</sub> surface modified MoVTenbO<sub>x</sub> before catalysis (fresh sample).



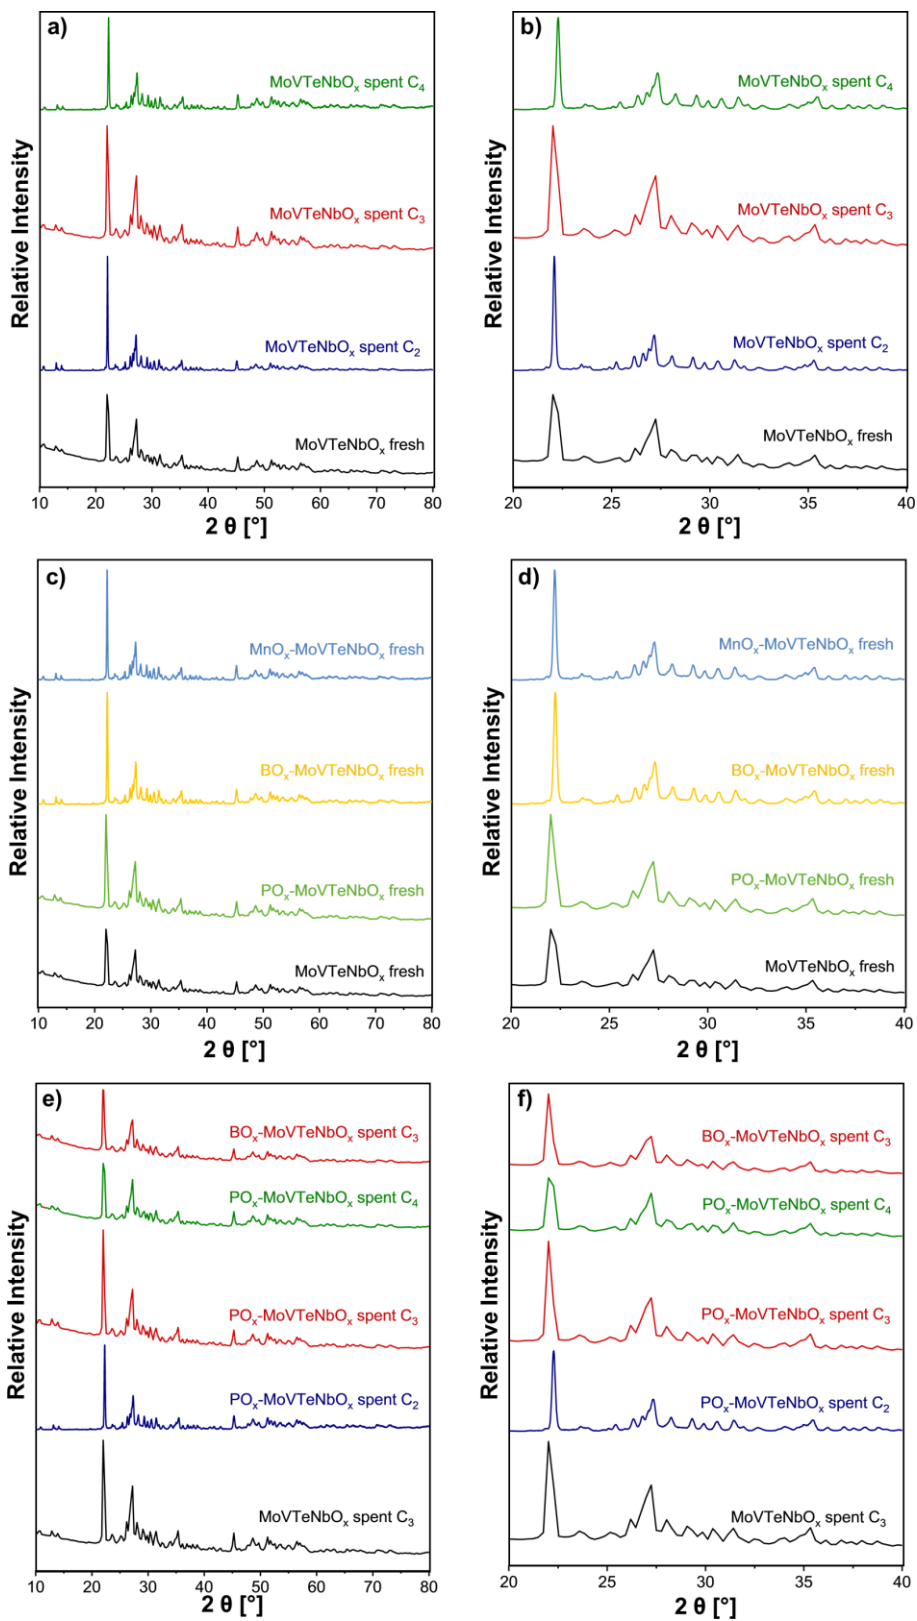

**Figure SI11.** XRPD patterns of selected, surface modified (BO<sub>x</sub><sup>-</sup>, PO<sub>x</sub><sup>-</sup>, MnO<sub>x</sub><sup>-</sup>) MoVTeNbO<sub>x</sub> samples before (fresh) and after (spent) catalysis (C<sub>2</sub>, C<sub>3</sub>, C<sub>4</sub>) in the angular range of (a, c, d) 10° ≤ 2θ < 80° and (b, d, f) 20° ≤ 2θ < 40°: Comparison between patterns of (a, b) base catalyst samples after different reactions, (c, d) surface modified (fresh) samples after ALD, (e, f) surface modified samples after catalysis.

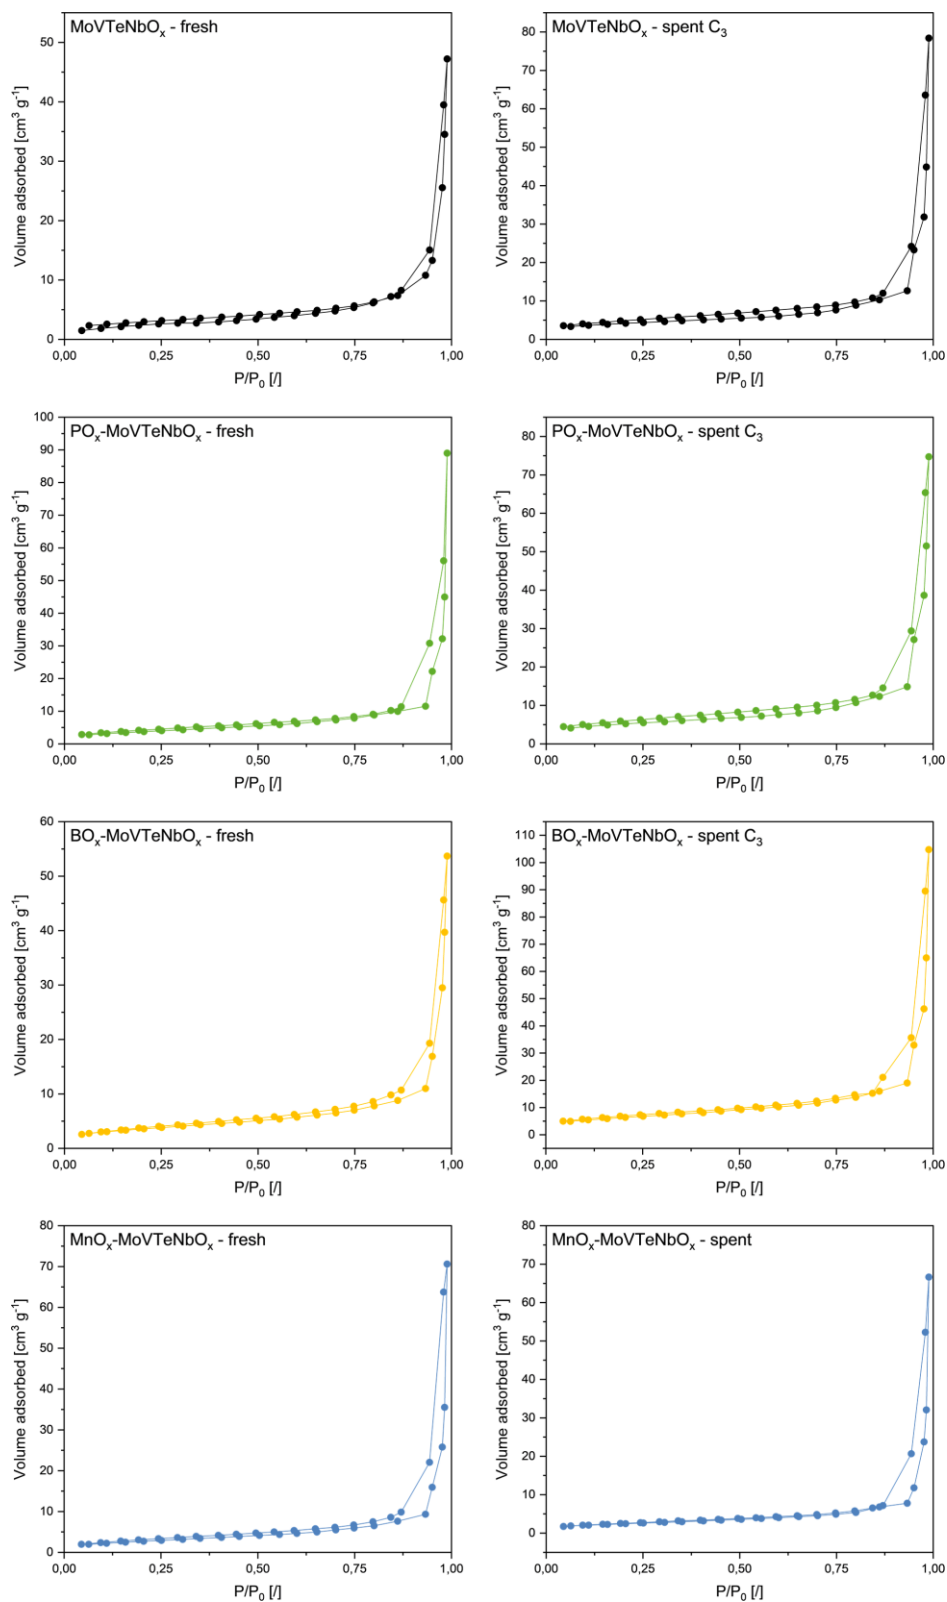

**Figure S112.**  $N_2$ -physorption measurement curves of adsorption and desorption: Comparison between the base catalyst and the surface modified ( $BO_{x-}$ ,  $PO_{x-}$ ,  $MnO_{x-}$ ) MoVTeNbO<sub>x</sub> samples before (fresh) and after (spent) catalysis.

**Table S12.** Results of N<sub>2</sub>-physisorption measurements of surface modified (BO<sub>x</sub>-, PO<sub>x</sub>-, MnO<sub>x</sub>-) MoVTenbO<sub>x</sub>: Specific BET-surface area before and after catalytic studies in the selective oxidation of propane; Pore volume calculated according to the BJH pore size distribution based on the N<sub>2</sub>-desorption.

|                                                            | MoVTenbO <sub>x</sub> | BO <sub>x</sub> -MoVTenbO <sub>x</sub> | PO <sub>x</sub> -MoVTenbO <sub>x</sub> | MnO <sub>x</sub> -MoVTenbO <sub>x</sub> |
|------------------------------------------------------------|-----------------------|----------------------------------------|----------------------------------------|-----------------------------------------|
| BET Surface area, fresh [m <sup>2</sup> /g]                | 7.7                   | 7.0                                    | 6.2                                    | 7.9                                     |
| BET Surface area, spent C <sub>3</sub> [m <sup>2</sup> /g] | 7.7                   | 7.9                                    | 7.1                                    | 7.1                                     |
| Pore-V <sub>BJH</sub> fresh [cm <sup>3</sup> /g]           | 0.016                 | 0.037                                  | 0.038                                  | 0.077                                   |
| Pore-V <sub>BJH</sub> spent [cm <sup>3</sup> /g]           | 0.050                 | 0.046                                  | 0.038                                  | 0.065                                   |

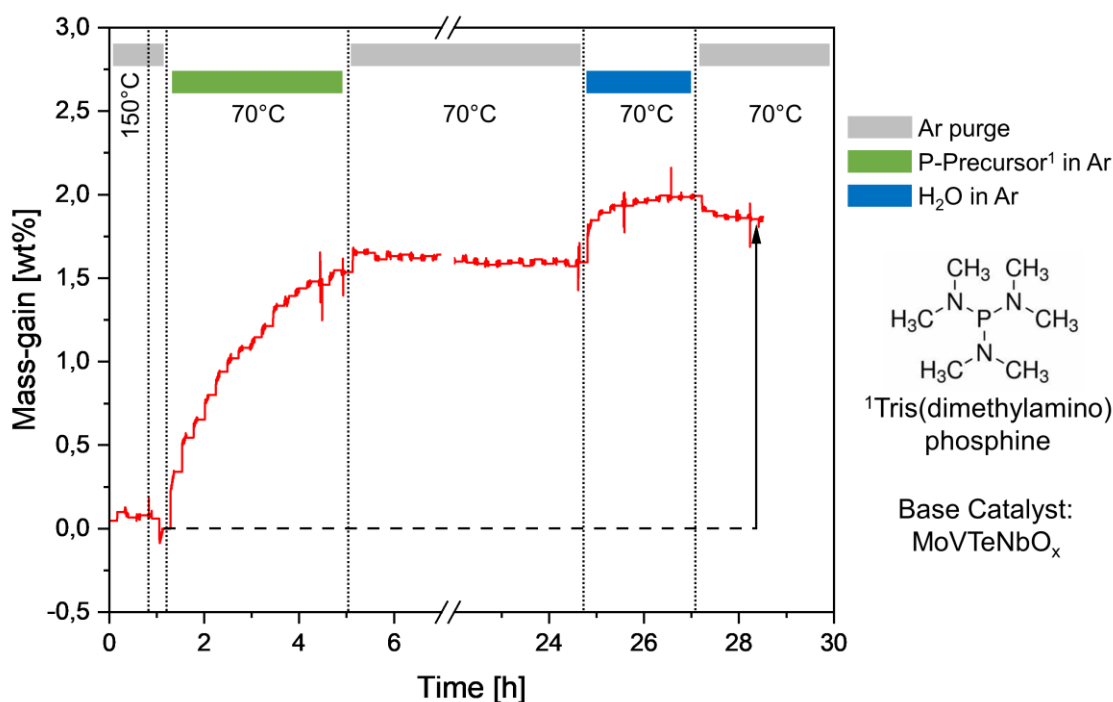

**Figure S113.** Gravimetric monitoring (*in situ*) of the PO<sub>x</sub>-ALD-process; exemplary the deposition of PO<sub>x</sub> on MoVTenbO<sub>x</sub> as base catalyst is presented. One ALD-cycle can be divided into two sequential solid-gas reactions or half-cycles, in which (1) the respective element precursor is dosed until saturation leading to a mass gain by surface deposition, then (2) the ligand is removed using water in Ar. In case of PO<sub>x</sub>-ALD all steps are proceeded at 70°C.

**Table S13.** Results of XPS measurements of surface modified (BO<sub>x</sub>-, PO<sub>x</sub>-, MnO<sub>x</sub>-)MoVTeNbO<sub>x</sub>: Near-surface composition in atomic% before and after catalytic studies in propane oxidation; Ratio R between the different oxidation states of V found at the near-surface.

| Catalyst                                       | Mo [%at] | V 2p <sub>3/2</sub> [%at] | Te [%at] | Nb 3d <sub>5/2</sub> [%at] | O 1s [%at] | B/P/Mn [%at] | R=V <sup>4+</sup> /(V <sup>4+</sup> +V <sup>5+</sup> ) |
|------------------------------------------------|----------|---------------------------|----------|----------------------------|------------|--------------|--------------------------------------------------------|
| MoVTeNbO <sub>x</sub> -fresh                   | 19.90    | 1.71                      | 2.66     | 3.21                       | 72.52      | /            | 0.55                                                   |
| MoVTeNbO <sub>x</sub> -spent                   | 19.13    | 1.80                      | 2.81     | 3.22                       | 73.04      | /            | 0.66                                                   |
| BO <sub>x</sub> -MoVTeNbO <sub>x</sub> -fresh  | 18.94    | 1.75                      | 2.64     | 3.19                       | 72.30      | 1,19         | 0.68                                                   |
| BO <sub>x</sub> -MoVTeNbO <sub>x</sub> -spent  | 19.79    | 1.73                      | 2.63     | 3.23                       | 72.62      | n.d.         | 0.56                                                   |
| PO <sub>x</sub> -MoVTeNbO <sub>x</sub> -fresh  | 16.80    | 1.50                      | 2.08     | 3.03                       | 73.16      | 3.43         | 0.58                                                   |
| PO <sub>x</sub> -MoVTeNbO <sub>x</sub> -spent  | 18.31    | 1.71                      | 2.54     | 3.01                       | 72.47      | 1.96         | 0.50                                                   |
| MnO <sub>x</sub> -MoVTeNbO <sub>x</sub> -fresh | 15.07    | 1.45                      | 2.17     | 2.48                       | 72.48      | 6.34         | 0.72                                                   |
| MnO <sub>x</sub> -MoVTeNbO <sub>x</sub> -spent | 17.81    | 1.78                      | 2.20     | 3.43                       | 72.05      | 2.72         | 0.71                                                   |

**Table S14.** Results of ICP-OES and XPS measurements of surface modified (BO<sub>x</sub>-, PO<sub>x</sub>-) MoVTeNbO<sub>x</sub>: Element composition as atomic ratios and mass fractions before and after catalytic studies in the selective oxidation of propane.

| Catalyst                                              | Mo [%at] | V [%at] | Te [%at] | Nb [%at] | O [%at] | B [%at] | P [%at] |
|-------------------------------------------------------|----------|---------|----------|----------|---------|---------|---------|
| BO <sub>x</sub> -MoVTeNbO <sub>x</sub> -fresh-ICP-OES | 19.27    | 2.93    | 2.40     | 2.36     | 70.10   | 2.94    | 0.00    |
| BO <sub>x</sub> -MoVTeNbO <sub>x</sub> -spent-ICP-OES | 18.69    | 2.92    | 2.26     | 2.31     | 72.76   | 1.05    | 0.00    |
| PO <sub>x</sub> -MoVTeNbO <sub>x</sub> -fresh-ICP-OES | 19.40    | 2.89    | 2.39     | 2.34     | 72.05   | 0.00    | 0.94    |
| PO <sub>x</sub> -MoVTeNbO <sub>x</sub> -spent-ICP-OES | 18.58    | 2.83    | 2.27     | 2.26     | 73.45   | 0.00    | 0.60    |
|                                                       | Mo [%wt] | V [%wt] | Te [%wt] | Nb [%wt] | O [%wt] | B [%wt] | P [%wt] |
| BO <sub>x</sub> -MoVTeNbO <sub>x</sub> -fresh-ICP-OES | 50.28    | 4.06    | 8.33     | 5.96     | 31.37   | 0.87    | 0.00    |
| BO <sub>x</sub> -MoVTeNbO <sub>x</sub> -spent-ICP-OES | 49.52    | 4.12    | 7.96     | 5.94     | 32.47   | 0.32    | 0.00    |
| PO <sub>x</sub> -MoVTeNbO <sub>x</sub> -fresh-ICP-OES | 50.14    | 3.97    | 8.22     | 5.85     | 31.84   | 0.00    | 0.79    |
| PO <sub>x</sub> -MoVTeNbO <sub>x</sub> -spent-ICP-OES | 49.23    | 3.99    | 8.02     | 5.81     | 32.97   | 0.00    | 0.52    |

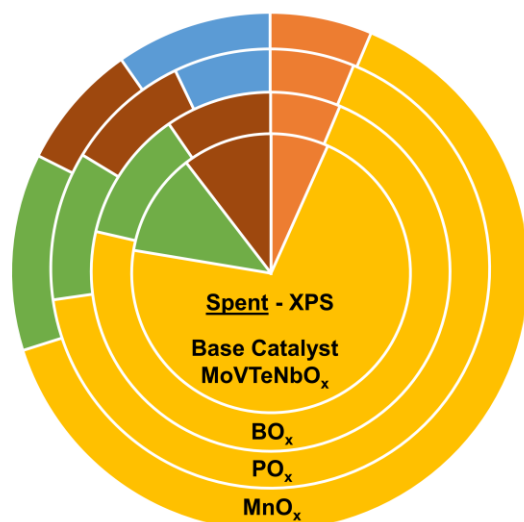

■ V ■ Mo ■ Nb ■ Te ■ ALD-Element

**Figure SI14.** Impact on near-surface composition (at%) by surface modification ( $\text{BO}_x$ -,  $\text{PO}_x$ -,  $\text{MnO}_x$ -) of the  $\text{MoVTeNbO}_x$  catalyst after propane oxidation (spent) determined by XPS measurements; the oxygen content is excluded for the visualization.

**$\text{BO}_x$  on  $\text{MoVTeNbO}_x$  fresh**

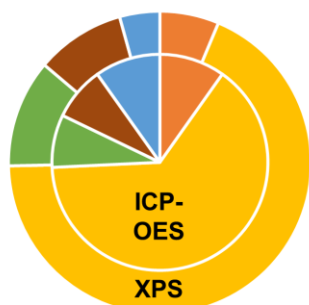

**$\text{PO}_x$  on  $\text{MoVTeNbO}_x$  fresh**

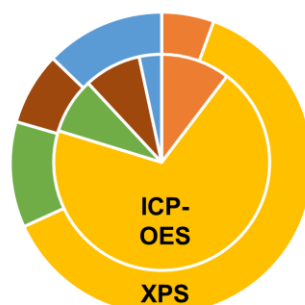

**$\text{BO}_x$  on  $\text{MoVTeNbO}_x$  spent**

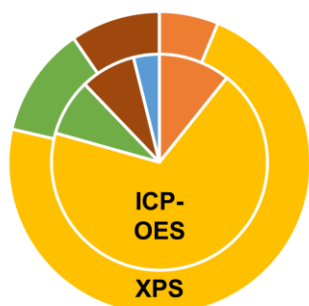

**$\text{PO}_x$  on  $\text{MoVTeNbO}_x$  spent**

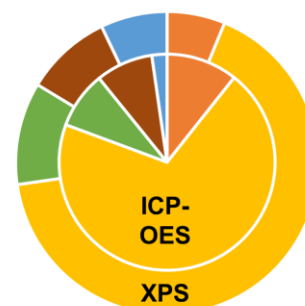

■ V ■ Mo ■ Nb ■ Te ■ ALD-Element

**Figure SI15.** Comparison between near-surface (XPS) and bulk composition (ICP-OES) (at%) of surface modified ( $\text{BO}_x$ -,  $\text{PO}_x$ -)  $\text{MoVTeNbO}_x$  catalyst before (fresh) and after propane oxidation (spent); the oxygen content is excluded for the visualization.

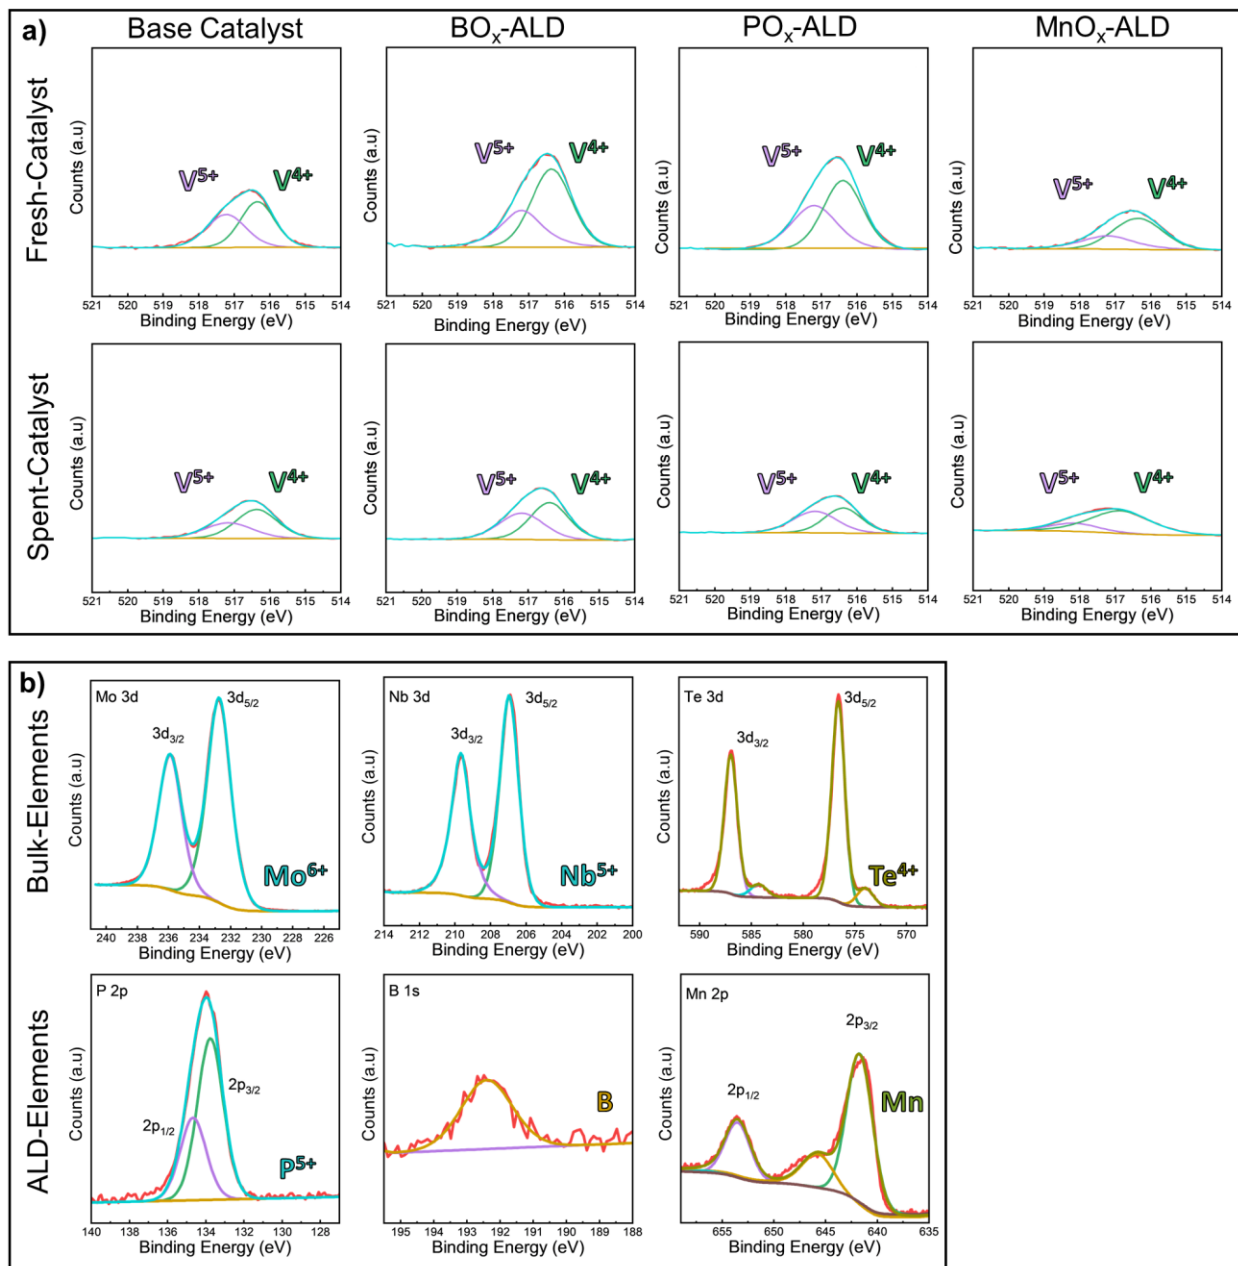

**Figure S116.** XPS spectra of surface modified ( $\text{BO}_x^-$ ,  $\text{PO}_x^-$ ,  $\text{MnO}_x^-$ )  $\text{MoVTenbO}_x$ : The two peaks located at 517.21 eV and 516.38 eV, correspond to  $\text{V}^{5+}$  and  $\text{V}^{4+}$ , respectively; The spectra for Nb 3d region depict two peaks located at 206.9 eV and 209.7 eV, correspond to  $3d_{5/2}$  and  $3d_{3/2}$  core level of  $\text{Nb}^{5+}$ , in all samples. The spectra for Mo 3d region depict two peaks located at 232.7 eV and 235.9 eV, correspond to  $3d_{5/2}$  and  $3d_{3/2}$  core level of  $\text{Mo}^{6+}$ , respectively. For all samples, the spectra for Te 3d region depicts two peaks located at 576.6 eV and 586.9 eV, correspond to  $3d_{5/2}$  and  $3d_{3/2}$  core level of  $\text{Te}^{4+}$ , together with the characteristics sub-oxide peaks at 573.9 eV and 584.3 eV. The two peaks located at 133.7 eV and 134.6 eV, correspond to  $2p_{3/2}$  and  $2p_{1/2}$  core level of  $\text{P}^{5+}$ . (a)  $2p_{3/2}$  region are shown before and after catalytic studies in propane oxidation, indicating the presence of  $\text{V}^{4+}$  and  $\text{V}^{5+}$  species. (b) Exemplary spectra for  $\text{Mo}^{6+}$ ,  $\text{Te}^{4+}$ ,  $\text{Nb}^{5+}$ , B,  $\text{P}^{5+}$  and Mn are shown due a high overall similarity.

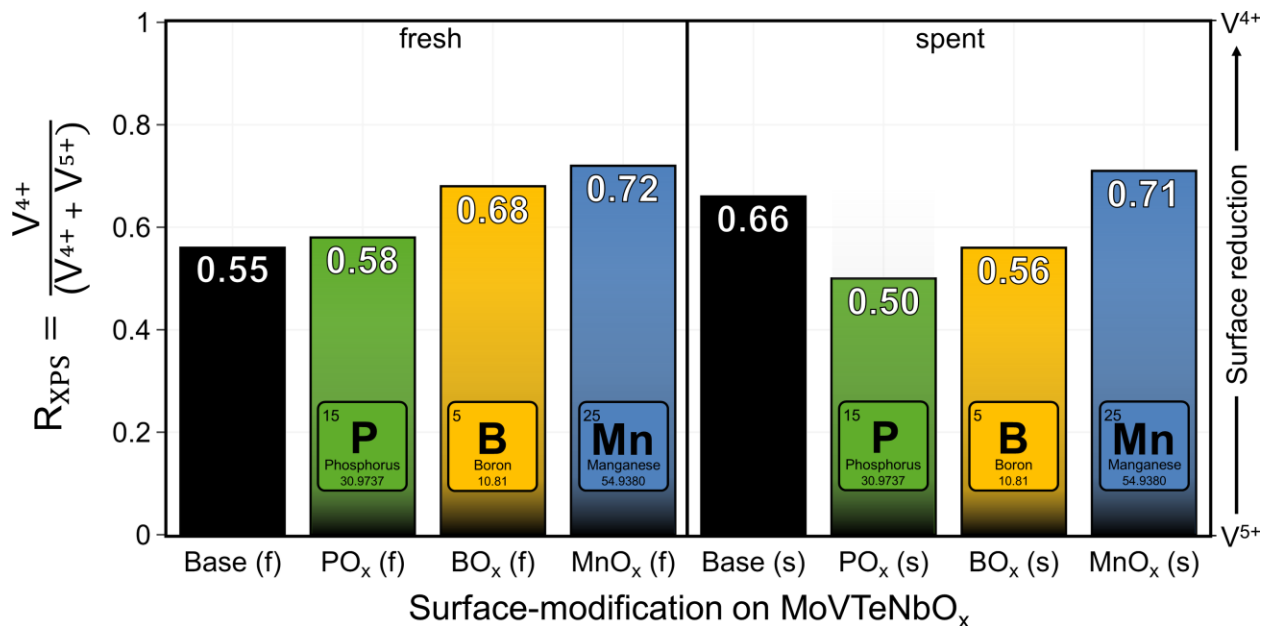

**Figure S117.** Effect of surface deposition of BO<sub>x</sub>, PO<sub>x</sub>, MnO<sub>x</sub> on the electronic environment of near-surface V-sites on MoVTenbO<sub>x</sub> before (fresh) and after catalysis in propane oxidation (spent); Ratio between reduced V<sup>4+</sup> species and the sum of V<sup>4+</sup> and V<sup>5+</sup> calculated from the XPS spectra in the of V 2p<sub>3/2</sub> region.

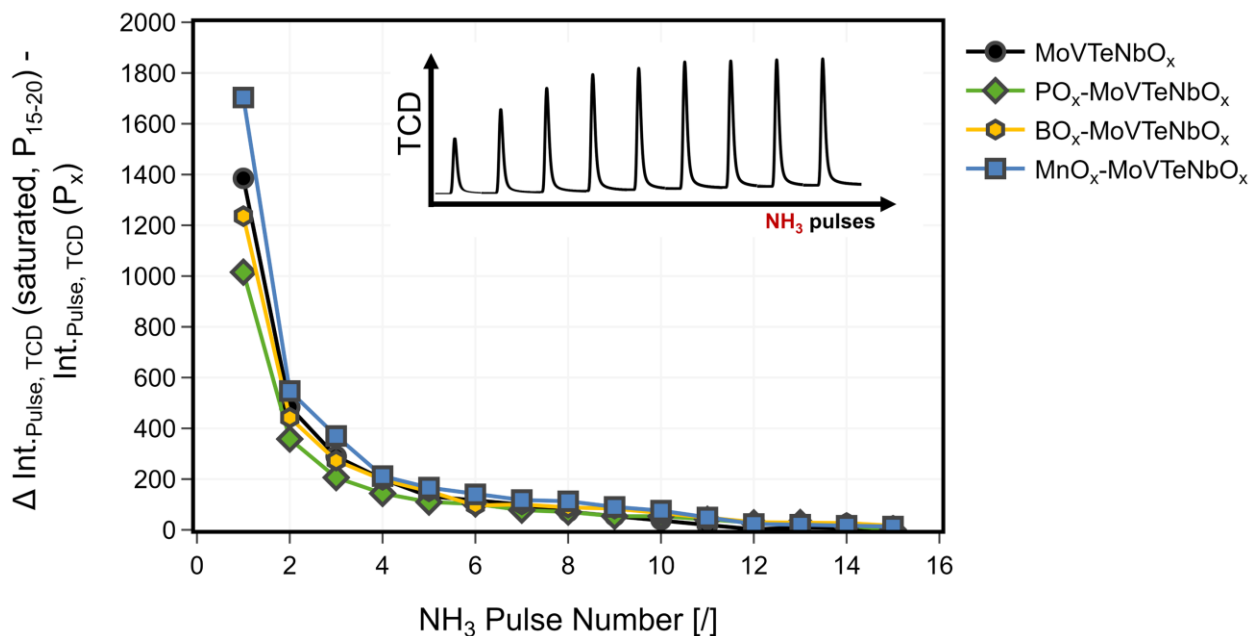

**Figure S118.** NH<sub>3</sub>-pulsing study of surface modified (BO<sub>x</sub>-, PO<sub>x</sub>-, MnO<sub>x</sub>-) MoVTenbO<sub>x</sub> samples at 90°C: Difference between the pulse integral (TCD) and the averaged pulse integral at saturation (Pulse 16 - Pulse 20) as a function of the number of the NH<sub>3</sub>-pulses.

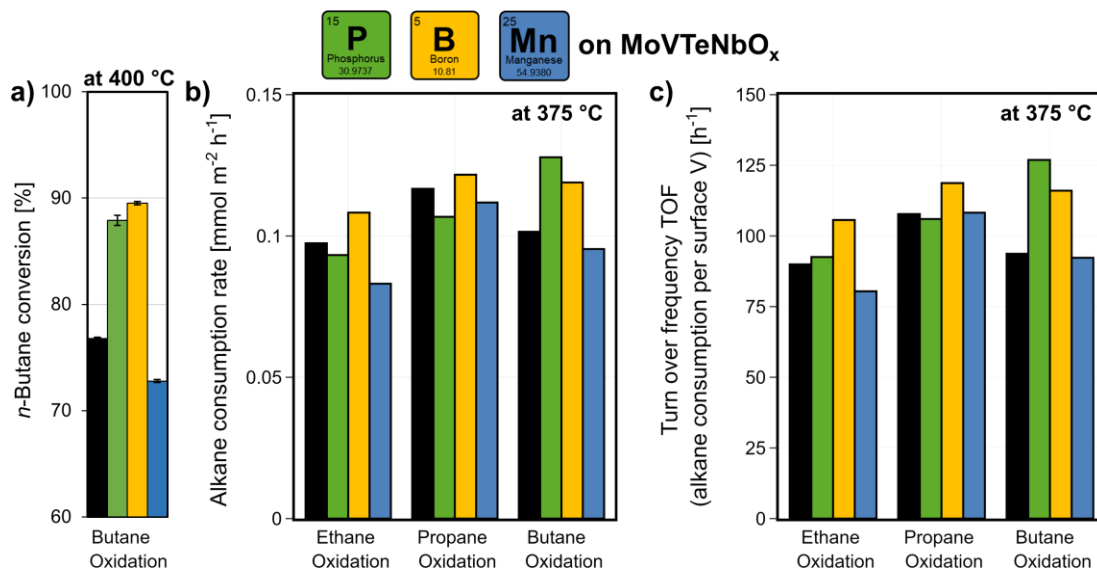

**Figure S119.** Change in catalytic activity by surface modification with BO<sub>x</sub>, PO<sub>x</sub>, MnO<sub>x</sub> on MoVTenbO<sub>x</sub>: (a) *n*-Butane conversion shown exemplary at 400°C with error-bars based on the four iteration measurements at one setpoint, (b) Alkane consumption rate at a fixed temperature setpoint of 375°C in ethane, propane, and *n*-butane oxidation; (c) Turn over frequency (TOF) of the respective alkane per V at the near-surface, determined by XPS-measurements of the spent samples at 375°C. The V-density at the near-surface was calculated based on the sum of metal atoms within the a-b plane of the unit cell of phase pure MoVTenbO<sub>x</sub> with M1-structure type <sup>6</sup>, the lattice parameter or dimensions determined <sup>7</sup>, and the amount of V determined by XPS. C<sub>2</sub>H<sub>6</sub>/O<sub>2</sub>/H<sub>2</sub>O=3/9/0 %vol, C<sub>3</sub>H<sub>8</sub>/O<sub>2</sub>/H<sub>2</sub>O=3/9/20 %vol, C<sub>4</sub>H<sub>10</sub>/O<sub>2</sub>/H<sub>2</sub>O=2/20/3 %vol, 1 atm, 1000 h<sup>-1</sup> (C<sub>2</sub>, C<sub>3</sub>) / 2000 h<sup>-1</sup> (C<sub>4</sub>).

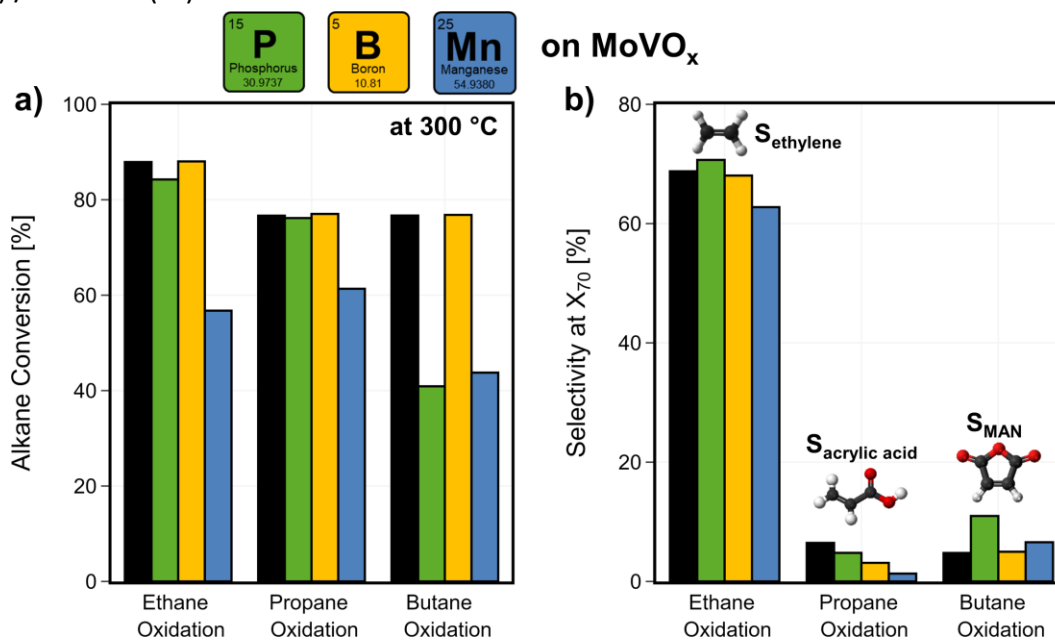

**Figure S120.** Catalytic impact of surface modification with BO<sub>x</sub>, PO<sub>x</sub>, MnO<sub>x</sub> on MoVO<sub>x</sub>: (a) Change in alkane conversion at a fixed temperature setpoint of 300°C and (b) target-product selectivity (C<sub>2</sub>: ethylene, C<sub>3</sub>: acrylic acid, C<sub>4</sub>: MAN) at a fixed conversion level of X<sub>alkane</sub> = 70% (interpolated) in ethane, propane, and *n*-butane oxidation. C<sub>2</sub>H<sub>6</sub>/O<sub>2</sub>/H<sub>2</sub>O=3/9/0 %vol, C<sub>3</sub>H<sub>8</sub>/O<sub>2</sub>/H<sub>2</sub>O=3/9/20 %vol, C<sub>4</sub>H<sub>10</sub>/O<sub>2</sub>/H<sub>2</sub>O=2/20/3 %vol, 1 atm, 1000 h<sup>-1</sup> (C<sub>2</sub>, C<sub>3</sub>) / 2000 h<sup>-1</sup> (C<sub>4</sub>).



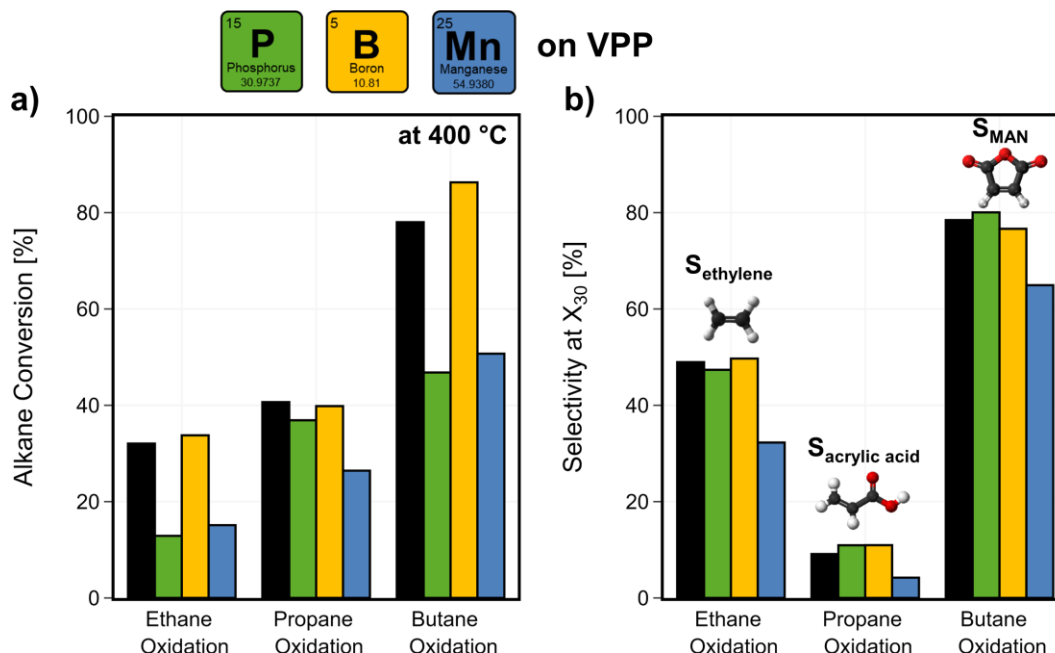

**Figure S121.** Catalytic impact of surface modification with  $\text{BO}_x$ ,  $\text{PO}_x$ ,  $\text{MnO}_x$  on VPP: (a) Change in alkane conversion at a fixed temperature setpoint of 400 °C and (b) target-product selectivity ( $\text{C}_2$ : ethylene,  $\text{C}_3$ : acrylic acid,  $\text{C}_4$ : MAN) at a fixed conversion level of  $X_{\text{alkane}} = 30\%$  (interpolated) in ethane, propane, and *n*-butane oxidation.  $\text{C}_2\text{H}_6/\text{O}_2/\text{H}_2\text{O}=3/9/0$  %vol,  $\text{C}_3\text{H}_8/\text{O}_2/\text{H}_2\text{O}=3/9/20$  %vol,  $\text{C}_4\text{H}_{10}/\text{O}_2/\text{H}_2\text{O}=2/20/3$  %vol, 1 atm, 1000  $\text{h}^{-1}$  ( $\text{C}_2$ ,  $\text{C}_3$ ) / 2000  $\text{h}^{-1}$  ( $\text{C}_4$ ).

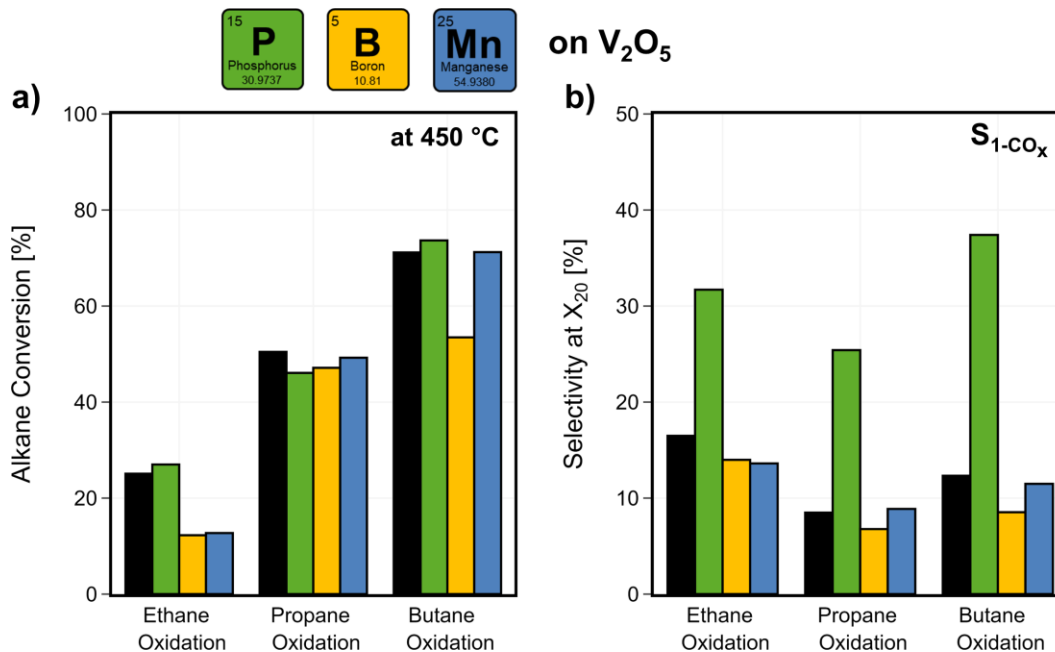

**Figure S122.** Catalytic impact of surface modification with  $\text{BO}_x$ ,  $\text{PO}_x$ ,  $\text{MnO}_x$  on  $\text{V}_2\text{O}_5$ : (a) Change in alkane conversion at a fixed temperature setpoint of 450 °C and (b) selectivity towards partial oxidation products ( $1\text{-CO}_x$ ) at a fixed conversion level of  $X_{\text{alkane}} = 20\%$  (interpolated) in ethane, propane, and *n*-butane oxidation.  $\text{C}_2\text{H}_6/\text{O}_2/\text{H}_2\text{O}=3/9/0$  %vol,  $\text{C}_3\text{H}_8/\text{O}_2/\text{H}_2\text{O}=3/9/20$  %vol,  $\text{C}_4\text{H}_{10}/\text{O}_2/\text{H}_2\text{O}=2/20/3$  %vol, 1 atm, 1000  $\text{h}^{-1}$  ( $\text{C}_2$ ,  $\text{C}_3$ ) / 2000  $\text{h}^{-1}$  ( $\text{C}_4$ ).

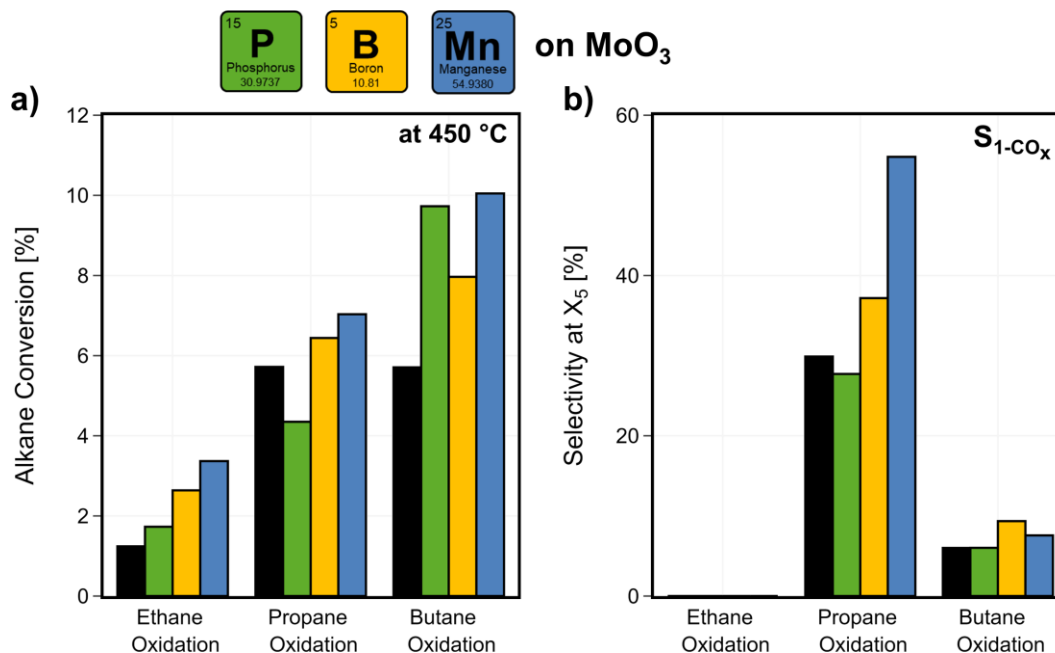

**Figure SI23.** Catalytic impact of surface modification with BO<sub>x</sub>, PO<sub>x</sub>, MnO<sub>x</sub> on MoO<sub>3</sub>: (a) Change in alkane conversion at a fixed temperature setpoint of 450 °C and (b) selectivity towards partial oxidation products (1-CO<sub>x</sub>) at a fixed conversion level of X<sub>alkane</sub> = 5% (interpolated) in ethane, propane, and *n*-butane oxidation; Selectivities in C<sub>2</sub> oxidation not shown due to low conversion. C<sub>2</sub>H<sub>6</sub>/O<sub>2</sub>/H<sub>2</sub>O=3/9/0 %vol, C<sub>3</sub>H<sub>8</sub>/O<sub>2</sub>/H<sub>2</sub>O=3/9/20 %vol, C<sub>4</sub>H<sub>10</sub>/O<sub>2</sub>/H<sub>2</sub>O=2/20/3 %vol, 1 atm, 1000 h<sup>-1</sup> (C<sub>2</sub>, C<sub>3</sub>) / 2000 h<sup>-1</sup> (C<sub>4</sub>).

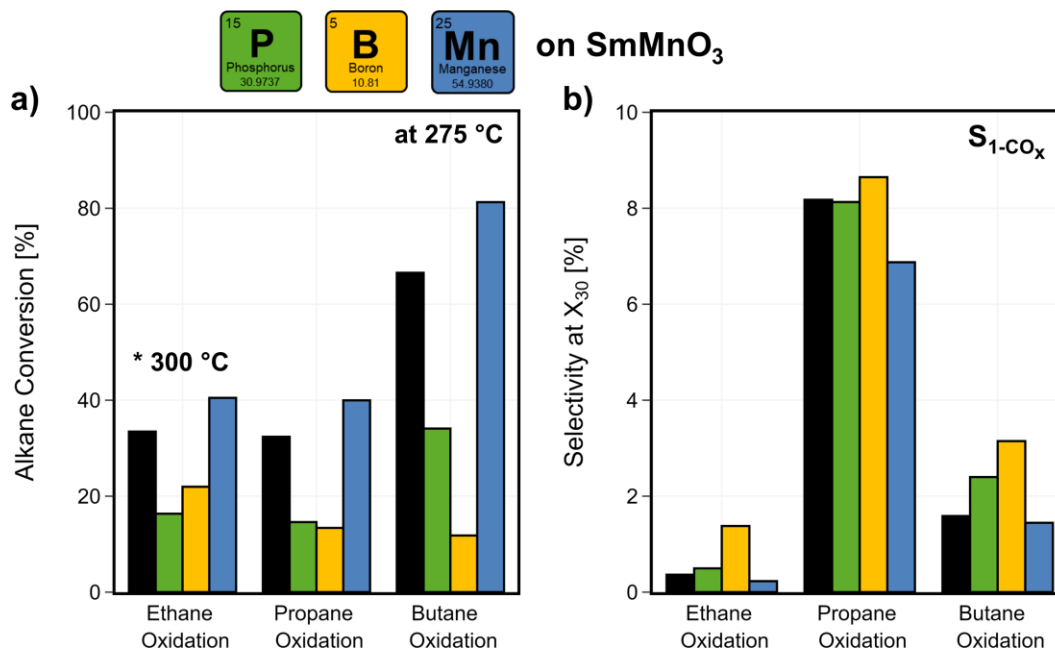

**Figure SI24.** Catalytic impact of surface modification with BO<sub>x</sub>, PO<sub>x</sub>, MnO<sub>x</sub> on SmMnO<sub>3</sub>: (a) Change in alkane conversion at fixed temperature setpoints of 275 °C and 300 °C and (b) selectivity towards partial oxidation products (1-CO<sub>x</sub>) at a fixed conversion level of X<sub>alkane</sub> = 30% (interpolated) in ethane, propane, and *n*-butane oxidation. C<sub>2</sub>H<sub>6</sub>/O<sub>2</sub>/H<sub>2</sub>O=3/9/0 %vol, C<sub>3</sub>H<sub>8</sub>/O<sub>2</sub>/H<sub>2</sub>O=3/9/20 %vol, C<sub>4</sub>H<sub>10</sub>/O<sub>2</sub>/H<sub>2</sub>O=2/20/3 %vol, 1 atm, 1000 h<sup>-1</sup> (C<sub>2</sub>, C<sub>3</sub>) / 2000 h<sup>-1</sup> (C<sub>4</sub>).

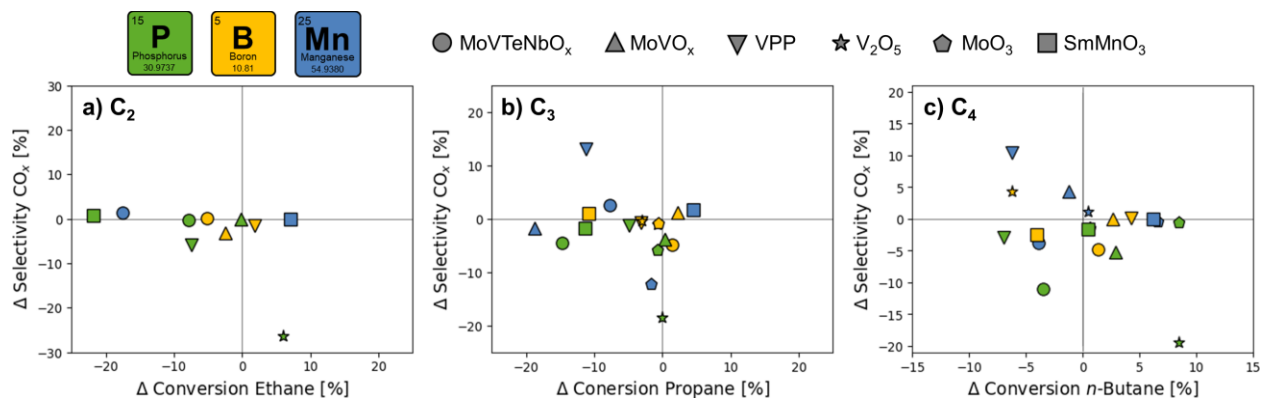

**Figure SI25.** Catalytic impact of surface modification with BO<sub>x</sub>, PO<sub>x</sub>, MnO<sub>x</sub>: Overview of changing selectivities of desired products and CO<sub>x</sub> due to tuned surfaces in (a) ethane-, (b) propane-, and (c) *n*-butane oxidation for the six studied catalysts MoVTeNbO<sub>x</sub>, MoVO<sub>x</sub>, MoO<sub>3</sub>, V<sub>2</sub>O<sub>5</sub>, VPP and SmMnO<sub>3</sub>. The data set represents the absolute change in selectivities and conversion comparing the surface modified sample with the respective base catalyst at a fixed temperature (depending on the catalyst and the reaction, see **Figure SI5** and **Figure SI6**) and fixed conversion of  $X_{\text{alkane}} = 15\%$  (exception: MoO<sub>3</sub> and SmMnO<sub>3</sub> is shown at  $X_{\text{alkane}} = 10\%$ ); the data set originates from GHSV-variation studies, in which the temperature is fixed for all samples to achieve a broad conversion range by varying the contact time in a range of 500 to 5000 h<sup>-1</sup>. The complete GHSV variation study can be found in the data set, provided in the SI. C<sub>2</sub>H<sub>6</sub>/O<sub>2</sub>/H<sub>2</sub>O=3/9/0 %vol, C<sub>3</sub>H<sub>8</sub>/O<sub>2</sub>/H<sub>2</sub>O=3/9/20 %vol, C<sub>4</sub>H<sub>10</sub>/O<sub>2</sub>/H<sub>2</sub>O=2/20/3 %vol, 1 atm.

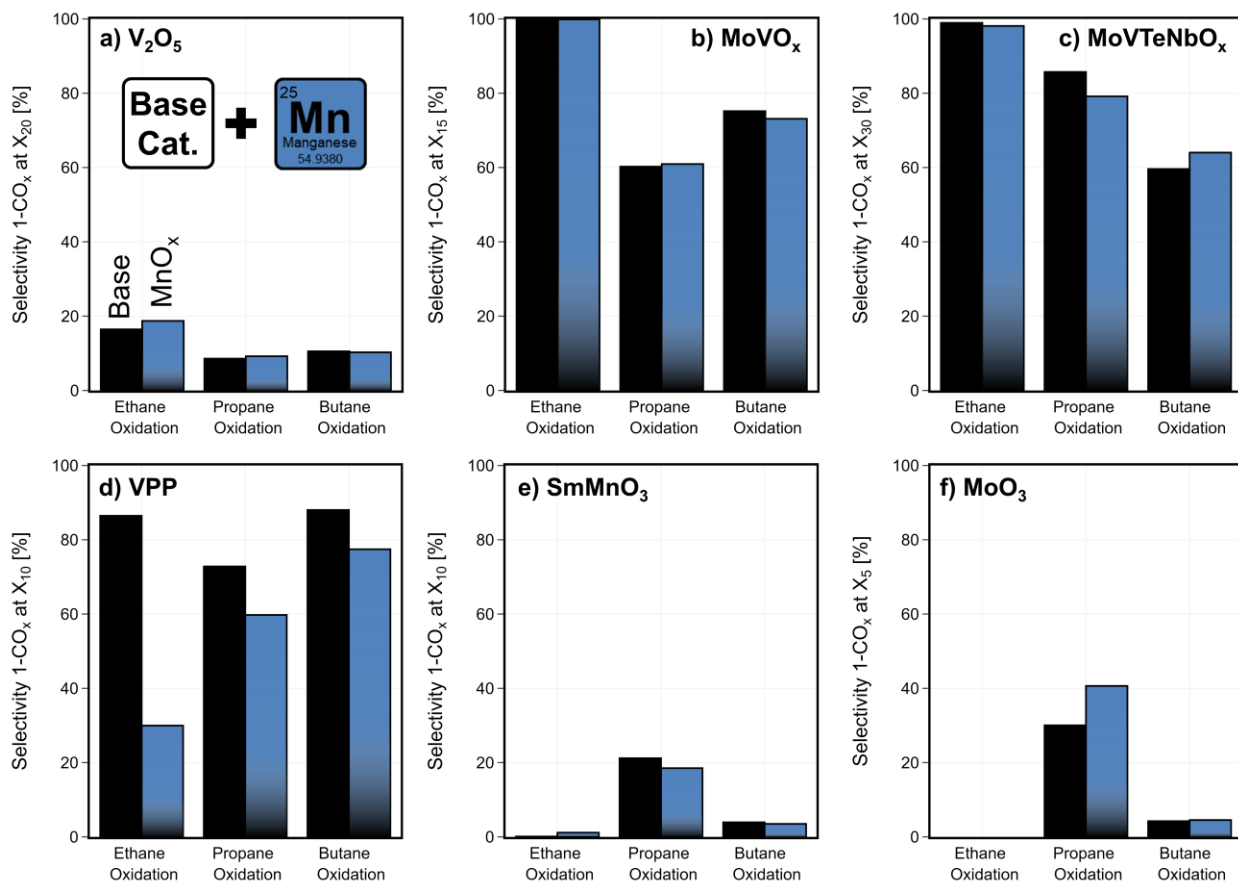

**Figure S126.** Change in product formation by the deposition of MnO<sub>x</sub> on the surface of the six studied catalysts (a) V<sub>2</sub>O<sub>5</sub>, (b) MoVO<sub>x</sub>, (c) MoVTenbO<sub>x</sub>, (d) VPP, (e) SmMnO<sub>3</sub>, (f) MoO<sub>3</sub>: Selectivity towards the sum of partial oxidation products (1-CO<sub>x</sub>) shown in ethane, propane, *n*-butane oxidation at fixed temperature setpoint for each reaction and catalyst (see contact time variation study Figure S15 and Figure S16); the product selectivity is shown at a fixed interpolated alkane conversion level by varying the contact time in a range of 500-5000 h<sup>-1</sup>; the complete contact time variation study can be found in the data set provided in the SI. C<sub>2</sub>H<sub>6</sub>/O<sub>2</sub>/H<sub>2</sub>O = 3/9/0 %vol, C<sub>3</sub>H<sub>8</sub>/O<sub>2</sub>/H<sub>2</sub>O = 3/9/20 %vol, C<sub>4</sub>H<sub>10</sub>/O<sub>2</sub>/H<sub>2</sub>O = 2/20/3 %vol, 1 atm.

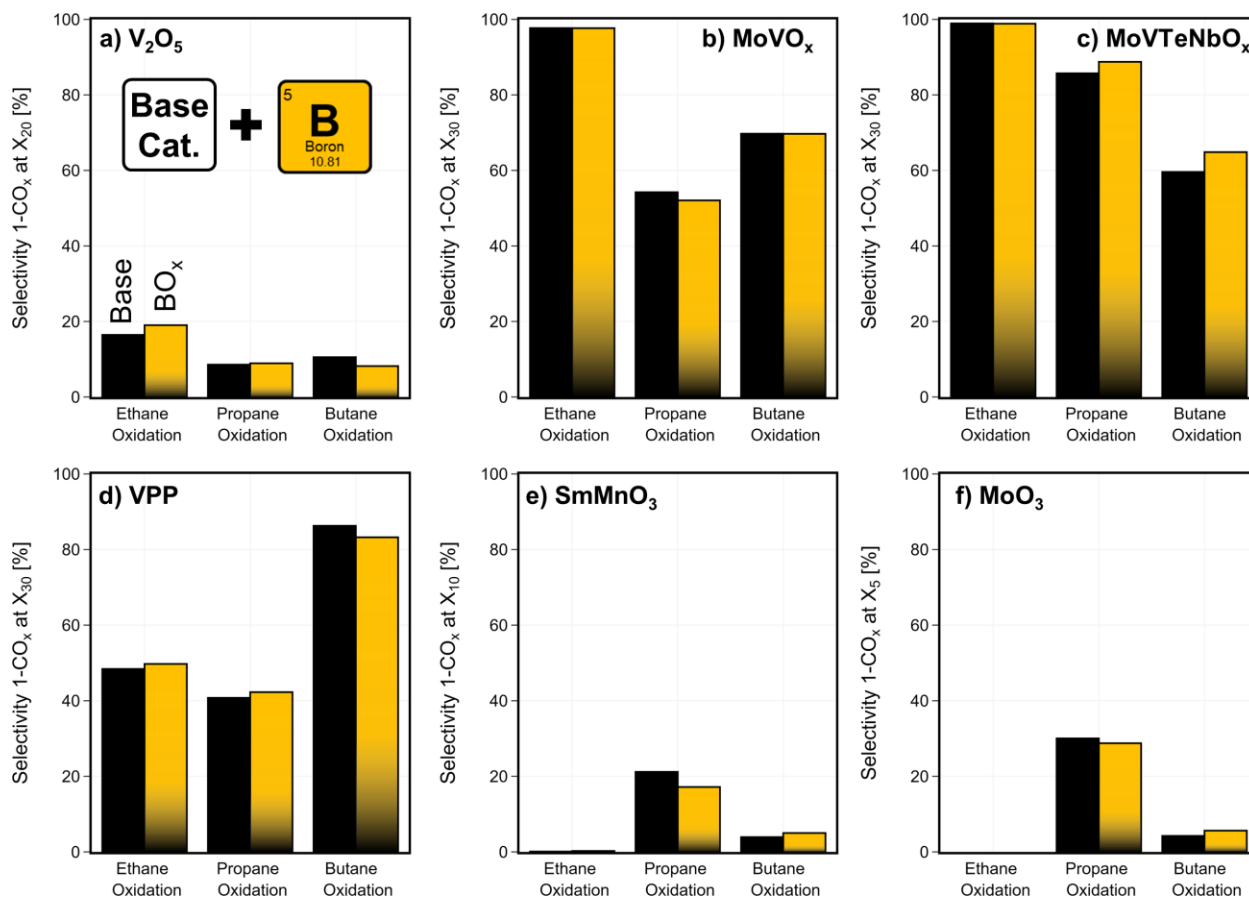

**Figure S127.** Change in product formation by the deposition of BO<sub>x</sub> on the surface of the six studied catalysts (a) V<sub>2</sub>O<sub>5</sub>, (b) MoVO<sub>x</sub>, (c) MoVTeNbO<sub>x</sub>, (d) VPP, (e) SmMnO<sub>3</sub>, (f) MoO<sub>3</sub>: Selectivity towards the sum of partial oxidation products (1-CO<sub>x</sub>) shown in ethane, propane, *n*-butane oxidation at fixed temperature setpoint for each reaction and catalyst (see contact time variation study Figure S15 and Figure S16); the product selectivity is shown at a fixed alkane conversion level by varying the contact time in a range of 500-5000 h<sup>-1</sup>; the complete contact time variation study can be found in the data set provided in the SI. C<sub>2</sub>H<sub>6</sub>/O<sub>2</sub>/H<sub>2</sub>O = 3/9/0 %vol, C<sub>3</sub>H<sub>8</sub>/O<sub>2</sub>/H<sub>2</sub>O = 3/9/20 %vol, C<sub>4</sub>H<sub>10</sub>/O<sub>2</sub>/H<sub>2</sub>O = 2/20/3 %vol, 1 atm.

## Base catalyst synthesis

**MoVTeNbO<sub>x</sub>**. Synthesis adapted from Kolen'ko Y. et al. (2011) <sup>8</sup>.

**MoVO<sub>x</sub>**. Synthesis according to Trunschke et al. (2017) <sup>9</sup>.

**MoO<sub>3</sub>**. Synthesis according to Cotter T. et al. (2013) <sup>10</sup>.

**V<sub>2</sub>O<sub>5</sub>**. Divanadium pentoxide (V<sub>2</sub>O<sub>5</sub>, purity 99.6 %, Dallan Galaxy Metal Material Co. Ltd., CAS-Nr. 1314-62-1).

**VPP**. Vanadyl(IV) pyrophosphate (VPP, (VO)<sub>2</sub>P<sub>2</sub>O<sub>7</sub>) was synthesized according to patent literature following an organic route <sup>11</sup>.

**SmMnO<sub>3</sub>**. Synthesis according to Koch et al. (2020) <sup>12</sup>.

## References

- 1 Gallagher, McCarthy. "Penn State University." *University Park, PA, USA, ICDD Grant-in-Aid* **1973**.
- 2 E. Bordes, P. Courtine, *J Catal* **1979**, 57 (2), 236–252.
- 3 R. Enjalbert, & J. E. A. N. Galy, *Acta Crystallographica Section C: Crystal Structure Communications*, **1986**, 42(11), 1467-1469.
- 4 H. E. Swanson, R. K. Fuyat, G. M. Ugrinic, Natl. Bur. Stand. (U.S.), Circ. 539, III, **1954**, 30.
- 5 L. Foppa, F. R  ther, M. Geske, G. Koch, F. Girgsdies, P. Kube, S. Carey, M. H  vecker, O. Timpe, A. Tarasov, M. Scheffler, F. Rosowski, R. Schl  gl, and A. Trunschke, *J. Am. Chem. Soc.* **2023**, 145 (6), 3427-3442.
- 6 D. Melzer, P. Xu, D. Hartmann, Y. Zhu, N. D. Browning, M. Sanchez-Sanchez, J. A. Lercher, *Angew. Chem. Int. Ed.* **2016**, 55, 8873.
- 7 P. DeSanto Jr., D. J. Buttrey, R. K. Grasselli, C. G. Lugmair, A., F. Volpe Jr., B. H. Toby, T. Vogt. *Z. Kristallogr.* **2004**, 219, 152.
- 8 Y.V. Kolen'ko, W. Zhang, R. Naumann d'Alnoncourt, F. Girgsdies, T.W. Hansen, T. Wolfram, R. Schl  gl, and A. Trunschke, *ChemCatChem*, **2011**, 3: 1597-1606.
- 9 A. Trunschke, J. Noack, S. Trojanov, F. Girgsdies, T. Lunkenbein, V. Pfeifer, M. H  vecker, P. Kube, C. Sprung, F. Rosowski and R. Schl  gl, *ACS Catalysis*, **2017**, 7, 3061–3071.
- 10 T. Cotter, B. Frank, W. Zhang, R. Schl  gl, and A. Trunschke, *Chemistry of Materials*, **2013** 25 (15), 3124-3136.
- 11 J. Weiguny, S. Storck, M. Duda, C. Dobner, European Patent 1487576(A1), **2003**.
- 12 G. Koch, M. H  vecker, D. Teschner, S. J. Carey, Y. Wang, P. Kube, W. Hetaba, T. Lunkenbein, G. Auffermann, O. Timpe, F. Rosowski, R. Schl  gl and A. Trunschke, *ACS Catalysis*, **2020**, 10, 7007–7020.
